# Supplementary material for: Variation in pnictogen–oxygen bonding unlocks greatly enhanced Brønsted basicity for the monomeric stibine oxide
Source: Royal Society of Chemistry journal article supplement (doi:10.1039/d3dt02113k), 2023-01-01
Supplement: d3dt02113k1.pdf [file d3dt02113k1.pdf]

Electronic Supplementary Information for

**Variation in pnictogen–oxygen bonding unlocks  
greatly enhanced Brønsted basicity for the  
monomeric stibine oxide**

*John S. Wenger,<sup>a</sup> Addis Getahun,<sup>a</sup> and Timothy C. Johnstone\*<sup>a</sup>*

<sup>a</sup> Department of Chemistry and Biochemistry, University of California Santa Cruz, Santa Cruz, California  
95064, United States.

## CONTENTS

|                                                                                                                                                                                            | Page |
|--------------------------------------------------------------------------------------------------------------------------------------------------------------------------------------------|------|
| General methods                                                                                                                                                                            | 3    |
| Discussion of intramolecular C–H activation product <b>3</b>                                                                                                                               | 8    |
| References                                                                                                                                                                                 | 9    |
| Figures S1 - S5: <sup>1</sup> H NMR, <sup>13</sup> C NMR, <sup>19</sup> F NMR, IR spectra, and PXRD of <b>2a</b>                                                                           | 10   |
| Figures S6 - S10: <sup>1</sup> H NMR, <sup>13</sup> C NMR, <sup>19</sup> F NMR, IR spectra, and PXRD of <b>2b</b> ·CHCl <sub>3</sub>                                                       | 12   |
| Figures S11 - S14: <sup>1</sup> H NMR, <sup>13</sup> C NMR, <sup>31</sup> P NMR, and <sup>19</sup> F NMR spectra of <b>2c</b>                                                              | 15   |
| Figures S15 - S18: <sup>1</sup> H NMR, <sup>13</sup> C NMR, <sup>31</sup> P NMR, and <sup>19</sup> F NMR of a 1:1 mixture of <b>1c</b> and triflic acid                                    | 17   |
| Figures S19 - S22: <sup>1</sup> H NMR, <sup>13</sup> C NMR, IR spectra, and PXRD of <b>4a</b>                                                                                              | 19   |
| Figures S23 - S26: <sup>1</sup> H NMR, <sup>13</sup> C NMR, IR spectra, and PXRD of <b>4b</b> · <sup>3</sup> / <sub>4</sub> (C <sub>6</sub> H <sub>12</sub> )                              | 21   |
| Figures S27 - S30: <sup>1</sup> H NMR, <sup>13</sup> C NMR, IR spectra, and PXRD of <b>5</b> ·2(CHCl <sub>3</sub> )                                                                        | 23   |
| Figures S31 - S34: <sup>1</sup> H NMR, <sup>13</sup> C NMR, IR spectra, and PXRD of <b>6</b>                                                                                               | 25   |
| Figures S35 - S42: <sup>1</sup> H NMR and <sup>19</sup> F NMR spectra of transesterification reaction mixtures                                                                             | 27   |
| Figures S43 - S52: Thermal ellipsoid plots of <b>2a-c</b> , <b>3</b> , <b>4a-b</b> , <b>5</b> , <b>6</b> , and <b>6</b> - <i>p</i> -nitrophenol                                            | 32   |
| Figures S53 - S54: Ball and stick representations of <b>1a</b> -cH <sup>+</sup> and phenols/oxides                                                                                         | 42   |
| Figures S55: Thermal ellipsoid plots of <b>3</b>                                                                                                                                           | 43   |
| Figures S56: Ball and stick representations of <b>3</b> <sup>+</sup> , <b>3</b> <sup>+</sup> (As), and <b>3</b> <sup>+</sup> (Sb)                                                          | 44   |
| Figures S57 - S59: Topological analysis of <b>1a</b> -cH <sup>+</sup>                                                                                                                      | 44   |
| Figures S60: Non-covalent interaction (NCI) analysis of <b>1a</b> -cH <sup>+</sup>                                                                                                         | 46   |
| Figures S61: Space-filling diagrams of <b>1a</b> -cH <sup>+</sup>                                                                                                                          | 47   |
| Table S1: Calculated reaction enthalpies and Gibbs free energies for H <sub>2</sub> elimination from <b>1a</b> -cH <sup>+</sup>                                                            | 47   |
| Tables S2 - S4: Crystallographic parameters                                                                                                                                                | 48   |
| Tables S5 - S7: Select data from NMR monitoring of titration of <b>2a</b> with triethylamine                                                                                               | 51   |
| Tables S8 - S10: Select data from NMR monitoring of titration of <b>2b</b> with acridine                                                                                                   | 54   |
| Table S11: Natural population analysis of <b>1a</b> -cH <sup>+</sup>                                                                                                                       | 57   |
| Tables S12 - S24: Optimized coordinates of <b>1a</b> -cH <sup>+</sup> , phenols/oxides, <b>3</b> <sup>+</sup> , <b>3</b> <sup>+</sup> (As), <b>3</b> <sup>+</sup> (Sb), and H <sub>2</sub> | 57   |

**General methods.** Reagents and solvents were purchased from commercial vendors and used as received unless otherwise specified. 1-Bromo-2,6-diisopropylbenzene, *p*-nitrophenyl acetate, iodosobenzene, Dipp<sub>3</sub>SbO (**1a**), Dipp<sub>3</sub>AsO (**1b**), and Dipp<sub>3</sub>PO (**1c**) were prepared using established procedures.<sup>1-3</sup> **Picric acid is explosive and should be handled with caution.** Triethylamine was freshly distilled before use. Dichloromethane (DCM) was purified using an Innovative Technology PURE-SOLV solvent purification system. All solvents were dried over 3-Å molecular sieves. NMR spectra were collected using a Bruker Avance III HD 500 spectrometer equipped with a multinuclear Smart Probe. Signals in the <sup>1</sup>H and <sup>13</sup>C NMR spectra are reported in ppm as chemical shifts from tetramethylsilane and were referenced using the CHCl<sub>3</sub> (<sup>1</sup>H, 7.26 ppm), CHD<sub>2</sub>CN (<sup>1</sup>H, 1.94 ppm), CDCl<sub>3</sub> (<sup>13</sup>C, 77.16 ppm), and CD<sub>3</sub>CN (<sup>13</sup>C, 118.26 ppm) solvent signals. The frequencies of <sup>19</sup>F NMR signals are reported in ppm as chemical shifts from CFCl<sub>3</sub> (referenced to BF<sub>3</sub>·Et<sub>2</sub>O at -152.8 ppm). <sup>31</sup>P NMR spectra were reported as chemical shifts from 85% H<sub>3</sub>PO<sub>4</sub> and were referenced using triphenylphosphine (-5.35 ppm). Infrared (IR) spectra were collected on KBr pellets using a PerkinElmer Spectrum One FT-IR spectrometer. Mass spectrometry measurements were collected using an LTQ-Orbitrap Velos Pro MS instrument.

**Synthesis of tris(2,6-diisopropylphenyl)hydroxystibonium trifluoromethanesulfonate ([Dipp<sub>3</sub>SbOH][O<sub>3</sub>SCF<sub>3</sub>] (2a).** Triflic acid (9.3 μL, 0.11 mmol) was added to a solution of **1a** (66 mg, 0.11 mmol) in DCM (2 mL). The reaction mixture was transferred under a layer of hexanes. Colorless crystals suitable for X-ray diffraction formed overnight, and the mixture was cooled to -20 °C for 1 h to drive crystallization. The mother liquor was decanted and the product was washed with pentane (3 x 5 mL). Yield: 69 mg (85%). M.p. 308 °C (decomposed). **MS (m/z) [M-O<sub>3</sub>SCF<sub>3</sub>]<sup>+</sup>** 621.305 (calc 621.305). **<sup>1</sup>H NMR (500 MHz, CD<sub>3</sub>CN)** δ 7.72 (t, *J* = 7.7 Hz, 3H), 7.59 (dd, *J* = 7.7, 1.1 Hz, 3H), 7.53 (dd, *J* = 7.7, 1.1 Hz, 3H), 4.71 (br s, 1H), 2.87 (sept, *J* = 6.4 Hz, 3H), 2.78 (sept, *J* = 6.3 Hz, 3H), 1.37 (d, *J* = 6.4 Hz, 9H), 1.25 (d, *J* = 6.5 Hz, 9H), 1.03 (d, *J* = 6.5 Hz, 9H), 0.90 (d, *J* = 6.4 Hz, 9H). **<sup>13</sup>C{<sup>1</sup>H} NMR (125 MHz, CD<sub>3</sub>CN)** δ 155.76, 153.75, 137.78, 135.49, 129.58, 128.43, 40.56, 37.81, 26.21, 25.26, 24.73, 24.22. **<sup>19</sup>F NMR (470 MHz, CDCl<sub>3</sub>)** δ -77.88.

**Synthesis of tris(2,6-diisopropylphenyl)hydroxyarsonium trifluoromethanesulfonate chloroform solvate ([Dipp<sub>3</sub>AsOH][O<sub>3</sub>SCF<sub>3</sub>]·CHCl<sub>3</sub>) (2b·CHCl<sub>3</sub>).** Triflic acid (8.3 μL, 0.093 mmol) was added to a solution of **1b** (53.7 mg, 0.093 mmol) in CHCl<sub>3</sub> (1 mL). Pentane was allowed to transfer into the reaction mixture by vapor diffusion. Colorless crystals suitable for X-ray diffraction formed overnight. The mother liquor was decanted and the product was washed with pentane (3 x 3 mL). Yield: 44 mg (56%). M.p. 249 °C (decomposed). **MS (m/z) [M-O<sub>3</sub>SCF<sub>3</sub>]<sup>+</sup>** 575.323 (calc 575.323). **<sup>1</sup>H NMR (500 MHz, CDCl<sub>3</sub>)** δ 7.63 (t, *J* = 7.8 Hz, 3H), 7.48 (d, *J* = 7.8 Hz, 3H), 7.34 (d, *J* = 7.7 Hz, 3H), 7.01 (s, 1H), 3.09 (sept, *J* = 6.3 Hz, 3H), 2.90 (sept, *J* = 6.4 Hz, 3H), 1.41 (d, *J* = 6.4 Hz, 9H), 1.19 (d, *J* = 6.6 Hz, 9H), 0.97 (d, *J* = 6.5 Hz, 9H), 0.83 (d, *J* = 6.4 Hz, 9H). **<sup>13</sup>C{<sup>1</sup>H} NMR (125 MHz, CDCl<sub>3</sub>)** δ 154.26, 150.80, 135.69, 134.33, 129.06, 126.99, 35.42, 33.88, 26.07, 25.32, 24.88, 23.82. **<sup>19</sup>F NMR (470 MHz, CDCl<sub>3</sub>)** δ -77.80.

**Crystal growth of tris(2,6-diisopropylphenyl)hydroxyphosphonium trifluoromethanesulfonate (2c).** Triflic acid (8 μL, 0.09 mmol) was added to a solution of **1c** (49.2 mg, 0.09 mmol) in DCM (0.7 mL). Colorless crystals of **2c** were grown by allowing the solution to slowly concentrate by evaporation, but not to dryness. The product was characterized by single-crystal X-ray diffraction. A portion of the crystals of **2c** grown in this manner were dissolved in CDCl<sub>3</sub> and characterized by NMR spectroscopy. **<sup>1</sup>H NMR (500 MHz, CDCl<sub>3</sub>)** δ 7.61 (td, *J* = 7.8, 1.6 Hz, 3H), 7.46 (ddd, *J* = 7.8, 4.5, 1.1 Hz, 3H), 7.37 – 7.30 (m, 3H), 5.12 (s, 4H), 3.26 (sept, *J* = 6.4 Hz, 3H), 2.82 (sept, *J* = 6.4 Hz, 3H), 1.36 (d, *J* = 6.5 Hz, 9H), 1.14 (d, *J* = 6.6 Hz, 9H), 0.96 (d, *J* = 6.5 Hz, 9H), 0.75 (d, *J* = 6.4 Hz, 9H). **<sup>13</sup>C{<sup>1</sup>H} NMR (125 MHz, CDCl<sub>3</sub>)** δ 156.26 (d, *J* = 9.0 Hz), 152.23 (d, *J* = 15.5 Hz), 134.35 (d, *J* = 2.6 Hz), 130.52 (d, *J* = 95.5 Hz), 128.30 (d, *J* = 11.2 Hz),

126.52 (d,  $J = 12.2$  Hz), 33.85 (d,  $J = 7.6$  Hz), 33.16 (d,  $J = 4.3$  Hz), 26.08, 25.19, 24.85, 23.91.  $^{19}\text{F}$  NMR (470 MHz,  $\text{CDCl}_3$ )  $\delta -78.09$ .  $^{31}\text{P}$  NMR (470 MHz,  $\text{CDCl}_3$ )  $\delta 52.15$ . NMR spectra were also collected on a mixture of **1c** (5 mg, 9  $\mu\text{mol}$ ) and triflic acid (0.8  $\mu\text{L}$ , 9  $\mu\text{mol}$ ) in  $\text{CDCl}_3$  (550  $\mu\text{L}$ ) and are consistent with the formation of **2c** in solution. When pentane was allowed to diffuse into a solution of triflic acid (7.8  $\mu\text{L}$ , 0.089  $\mu\text{mol}$ ) and **1c** (47 mg, 0.089 mmol) in chloroform (1 mL), an oil was produced. The oil was redissolved in DCM and addition of hexanes produced a small batch of crystals of **3**, which were characterized by single-crystal X-ray diffraction.

**Synthesis of tris(2,6-diisopropylphenyl)hydroxystibonium 2,4,6-trinitrophenoxide ([Dipp<sub>3</sub>SbOH][OPh(NO<sub>2</sub>)<sub>3</sub>]) (4a).** Picric acid (20 mg, 0.088 mmol) was added to a solution of **1a** (55 mg, 0.088 mmol) in  $\text{CHCl}_3$  (1 mL) to form a bright yellow solution. Pentane was allowed to transfer into the reaction mixture by vapor diffusion. Yellow crystals suitable for X-ray diffraction formed overnight. The mother liquor was decanted and the product was washed with pentane (3 x 3 mL). Yield: 51 mg (71%). The melting point was not measured because of the known exothermic reactivity of picric acid and picrate salts. **MS (m/z) [M-(O<sub>2</sub>N)<sub>3</sub>PhO]<sup>+</sup>** 621.305 (calc 621.305).  $^1\text{H}$  NMR (500 MHz,  $\text{CDCl}_3$ )  $\delta$  8.75 (s, 2H), 7.59 (t,  $J = 7.7$  Hz, 3H), 7.39 (dd,  $J = 7.7, 1.2$  Hz, 3H), 7.35 (dd,  $J = 7.7, 1.2$  Hz, 3H), 3.19 (sept,  $J = 6.3$  Hz, 3H), 2.86 (sept,  $J = 6.4$  Hz, 3H), 1.31 (d,  $J = 6.3$  Hz, 9H), 1.24 (d,  $J = 6.6$  Hz, 9H), 0.96 (d,  $J = 6.5$  Hz, 9H), 0.91 (d,  $J = 6.4$  Hz, 9H).  $^{13}\text{C}\{^1\text{H}\}$  NMR (125 MHz,  $\text{CDCl}_3$ )  $\delta$  161.04, 155.98, 152.35, 141.71, 137.67, 133.93, 128.33, 126.89, 126.75, 126.42, 39.05, 36.65, 26.27, 25.29, 24.94, 24.23.

**Synthesis of tris(2,6-diisopropylphenyl)hydroxyarsonium 2,4,6-trinitrophenoxide cyclohexane solvate ([Dipp<sub>3</sub>AsOH][OPh(NO<sub>2</sub>)<sub>3</sub>]· $\frac{3}{4}$ (C<sub>6</sub>H<sub>12</sub>)) (4b· $\frac{3}{4}$ (C<sub>6</sub>H<sub>12</sub>)).** Picric acid (24 mg, 0.11 mmol) was added to a solution of **1b** (60 mg, 0.11 mmol) in DCM (2 mL) to form a bright yellow solution. The reaction mixture was transferred under a layer of cyclohexane. Yellow crystals suitable for X-ray diffraction formed overnight. The mother liquor was decanted and the product was washed with pentane (3 x 3 mL). Yield: 45 mg (50%). The melting point was not measured because of the known exothermic reactivity of picric acid and picrate salts. **MS (m/z) [M-(O<sub>2</sub>N)<sub>3</sub>PhO]<sup>+</sup>** 575.323 (calc 575.323).  $^1\text{H}$  NMR (500 MHz,  $\text{CDCl}_3$ )  $\delta$  8.76 (s, 2H), 7.57 (t,  $J = 7.7$  Hz, 3H), 7.38 (d,  $J = 7.2$  Hz, 3H), 7.34 (d,  $J = 7.7$  Hz, 3H), 3.15 (sept,  $J = 6.3$  Hz, 3H), 3.12 (sept,  $J = 6.3$  Hz, 3H), 1.42 (s, 8H), 1.27 (d,  $J = 6.4$  Hz, 9H), 1.19 (d,  $J = 6.6$  Hz, 9H), 0.89 (d,  $J = 6.5$  Hz, 9H), 0.85 (d,  $J = 6.4$  Hz, 9H).  $^{13}\text{C}\{^1\text{H}\}$  NMR (125 MHz,  $\text{CDCl}_3$ )  $\delta$  160.23, 154.67, 150.77, 141.55, 136.35, 133.82, 128.45, 127.51, 126.83, 126.36, 35.09, 33.44, 27.06, 26.05, 25.41, 25.16, 23.84.

**Synthesis of tris(2,6-diisopropylphenyl)hydroxystibonium 2,4-dinitrophenoxide chloroform disolvate ([Dipp<sub>3</sub>SbOH][OPh(NO<sub>2</sub>)<sub>2</sub>]·2(CHCl<sub>3</sub>)) (5·2(CHCl<sub>3</sub>)).** 2,4-Dinitrophenol (14.8 mg, 0.080 mmol) and **1a** (50 mg, 0.080 mmol) were dissolved in  $\text{CHCl}_3$  (1.5 mL). The bright yellow solution was transferred under a layer of cyclohexane (18 mL). Yellow crystals suitable for X-ray diffraction grew overnight. The solvent was decanted and the crystals were washed with pentane (5 mL). Yield: 41 mg (49%). M.p. 186 °C (decomposed). **MS (m/z) [M-(O<sub>2</sub>N)<sub>2</sub>PhO]<sup>+</sup>** 621.305 (calc 621.305).  $^1\text{H}$  NMR (500 MHz,  $\text{CDCl}_3$ )  $\delta$  8.80 (d,  $J = 3.0$  Hz, 1H), 7.86 (dd,  $J = 9.6, 3.0$  Hz, 1H), 7.57 (t,  $J = 7.7$  Hz, 3H), 7.40 (d,  $J = 6.9$  Hz, 3H), 7.32 (d,  $J = 7.6$  Hz, 3H), 6.30 (d,  $J = 9.6$  Hz, 1H), 3.40 (sept,  $J = 5.9$  Hz, 3H), 2.88 (sept,  $J = 6.3$  Hz, 3H), 1.34 (d,  $J = 6.3$  Hz, 9H), 1.23 (d,  $J = 6.5$  Hz, 9H), 0.96 (d,  $J = 6.5$  Hz, 9H), 0.86 (d,  $J = 6.4$  Hz, 9H).  $^{13}\text{C}\{^1\text{H}\}$  NMR (125 MHz,  $\text{CDCl}_3$ )  $\delta$  156.25, 152.32, 138.28, 136.55, 133.57, 128.41, 128.26, 126.51, 124.92, 124.35, 38.51, 36.28, 27.06, 26.52, 25.17, 24.73, 24.48.

**Synthesis of tris(2,6-diisopropylphenyl)stibine oxide 4-nitrophenol adduct (Dipp<sub>3</sub>SbO·HOPhNO<sub>2</sub>) (6).** 4-Nitrophenol (3.3 mg, 0.024 mmol) and **1a** (15 mg, 0.024 mmol) were dissolved in  $\text{CHCl}_3$  (1 mL). The bright yellow solution was transferred under a layer of cyclohexane (18 mL). Yellow crystals suitable for

X-ray diffraction grew overnight. The solvent was decanted and the crystals were washed with pentane (5 mL). Yield: 6 mg (32%). M.p. 224 °C (decomposed). **MS (*m/z*) [M–O<sub>2</sub>NPhO]<sup>+</sup>** 621.305 (calc 621.305). **<sup>1</sup>H NMR (500 MHz, CDCl<sub>3</sub>)** δ 8.00 (d, *J* = 9.2 Hz, 2H), 7.48 (t, *J* = 7.7 Hz, 3H), 7.36 (d, *J* = 7.5 Hz, 3H), 7.23 (d, *J* = 7.6 Hz, 3H), 6.90 (d, *J* = 9.2 Hz, 2H), 3.99 (br sept, *J* = 6.3 Hz, 3H), 2.95 (sept, *J* = 6.3 Hz, 3H), 1.35 (d, *J* = 5.7 Hz, 9H), 1.19 (d, *J* = 6.1 Hz, 9H), 0.96 (d, *J* = 6.3 Hz, 9H), 0.77 (d, *J* = 6.0 Hz, 9H). **<sup>13</sup>C{<sup>1</sup>H} NMR (125 MHz, CDCl<sub>3</sub>)** δ 156.69, 152.21, 140.38, 138.32, 132.43, 128.23, 127.52, 126.22, 125.82, 116.58, 37.48, 34.77, 26.78, 25.07, 24.69.

**Titration of 2a with triethylamine.** A solution of **2a** (2.5 mg, 4.0 μmol) in d<sub>3</sub>-MeCN (600 μL) was prepared. Triethylamine (100 μL) was diluted in d<sub>3</sub>-MeCN (900 μL). NMR spectra were collected after addition of aliquots of the triethylamine solution or pure triethylamine (Tables S5 - S7). The experiment was performed in triplicate.

**Titration of 2b with acridine.** A solution of **2b** (1.5 mg, 2.6 μmol) in d<sub>3</sub>-MeCN (500 μL) was prepared. A separate solution of acridine (37.1 mg, 0.2 mmol) in d<sub>3</sub>-MeCN (750 μL) was prepared. NMR spectra were collected after addition of aliquots of the acridine solution (Table S8 - S10). For the final data points, solid acridine was added to the sample. The experiment was performed in triplicate.

**General transesterification reaction.** A solution of *p*-nitrophenyl acetate (13.4 mg, 0.074 mmol), 2,2,2-trifluoroethanol (10 equiv, 53.2 μL, 0.74 mmol), and catalyst (0.2 equiv, 0.015 mmol) in CDCl<sub>3</sub> (500 μL) was prepared and transferred to an NMR tube. The NMR tube was heated to 50 °C in an oil bath. <sup>1</sup>H and <sup>19</sup>F NMR spectra were collected on the samples to monitor the reaction after 26 h (Figures S35 - S42).

**X-ray crystallography: Independent Atom Model (IAM).** Crystals of **2a**, **2b**·CHCl<sub>3</sub>, **2c**, **3**, **4a**, **4b**·<sup>3</sup>/<sub>4</sub>(C<sub>6</sub>H<sub>12</sub>), **5**·2(CHCl<sub>3</sub>), **6**, and **6**·*p*-nitrophenol were grown as described above, selected under a microscope, loaded onto a MiTeGen polyimide sample loop using Paratone-N, and mounted onto a Rigaku XtaLAB Synergy-S single-crystal diffractometer. Each crystal was cooled to 100 K under a stream of nitrogen. Diffraction of Mo Kα or Cu Kα radiation from a PhotonJet-S microfocus source was detected using a HyPix6000HE hybrid photon counting detector. Screening, indexing, data collection, and data processing were performed with CrysAlisPro.<sup>4</sup> The structures were solved using SHELXT and refined using SHELXL following established strategies.<sup>5-7</sup> All non-H atoms were refined anisotropically. C-bound H atoms were placed at calculated positions and refined with a riding model and coupled isotropic displacement parameters (1.2 × U<sub>eq</sub> for aryl and methylene groups and 1.5 × U<sub>eq</sub> for methyl groups). O-bound H atoms were located in the Fourier difference map and refined semi-freely, employing distance restraints. Disordered atoms were treated with distance, similarity, and rigid-bond restraints.

**X-ray crystallography: Hirshfeld atom refinement (HAR).** The IAM results for **6** and **6**·*p*-nitrophenol were used as input for the *NoSpherA2* implementation of HAR in *Olex2* (version 1.5).<sup>8</sup> The quantum chemistry calculations were performed by ORCA (version 5.0.1).<sup>9, 10</sup> A wavefunction was calculated with high integration accuracy and tight SCF convergence criteria using the PBE0 hybrid functional and the x2c-TZVPP all-electron relativistically contracted basis set.<sup>11-14</sup> The effects of relativity were introduced using the second-order Douglass-Kroll-Hess formalism.<sup>15</sup> Least-squares crystallographic refinement was carried out with the *olex2.refine* engine.<sup>16</sup> The ADPs and positions of non-H atoms were freely refined using the aspherical atomic form factors obtained from Hirshfeld stockholder partitioning of the theoretical electron density obtained from the computed wavefunction.<sup>17</sup> C-bound H-atom positions were refined semi-freely; distance restraints were applied to chemically similar C–H bond lengths. H-atom isotropic thermal parameters were refined freely. The positional and isotropic thermal parameters of O-bound H atoms were refined freely. The newly refined atomic coordinates were used as the input

for a new density functional theory (DFT) calculation, from which new aspherical form factors were obtained. This procedure was iterated until it had converged.

**Powder X-ray diffraction (PXRD).** Bulk samples of were ground using an agate mortar and pestle. The fine white powders were each loaded onto a MiTeGen polyimide sample loop using Paratone-N and mounted onto a Rigaku XtaLAB Synergy-S single-crystal diffractometer. The powder was cooled to 100 K under a stream of nitrogen. The diffraction of Cu K $\alpha$  radiation was collected while the sample underwent a Gandolfi scan. Data collection and processing were performed using CrysAlisPro. Simulated PXRD diffractograms were generated from the crystal structures of **2a**, **2b**·CHCl<sub>3</sub> triclinic, **2c**, **3**, **4a**, **4b**· $\frac{3}{4}$ (C<sub>6</sub>H<sub>12</sub>), **5**·2(CHCl<sub>3</sub>), and **6** using Mercury and compared to the experimentally determined diffractograms.

**Computational experiments.** Geometry optimizations were performed on **1a-c**, **1a-cH<sup>+</sup>**, *p*-nitrophenol, *p*-nitrophenoxide, 2,4-dinitrophenol, 2,4-dinitrophenoxide, picric acid, picrate, **3<sup>+</sup>**, **3<sup>+</sup>(As)**, and **3<sup>+</sup>(Sb)** at the PBE0/def2-TZVPP level of theory with the RIJCOSX approximation and def2/J auxiliary basis set in the gas phase.<sup>11-13, 18, 19</sup> Frequency calculations were performed at the same level of theory for **1a-c**, **1a-cH<sup>+</sup>**, **3<sup>+</sup>**, **3<sup>+</sup>(As)**, and **3<sup>+</sup>(Sb)** in the gas phase. Proton affinities of **1a-c** were calculated by subtracting the enthalpy of the deprotonated species from that of the protonated species. Frequency calculations were then performed on **1a-c**, **1a-cH<sup>+</sup>**, *p*-nitrophenol, *p*-nitrophenoxide, 2,4-dinitrophenol, 2,4-dinitrophenoxide, picric acid, and picrate at the same level of theory including implicit DCM solvation. Isodesmic reaction free energies in DCM were calculated by subtracting the sum of the free energies of the products from that of the reactants. Energetic analysis of the elimination of H<sub>2</sub> from cations **1a-cH<sup>+</sup>** to form cyclized alkoxyphosphonium cations **3<sup>+</sup>(Sb)**, **3<sup>+</sup>(As)**, and **3<sup>+</sup>**, respectively, were performed by subtracting the sum of the Gibbs free energies of the cyclized alkoxyphosphonium and H<sub>2</sub> from that of the corresponding hydroxyphosphonium cation. Single point energy calculations were performed using ORCA 5.0.0 or ORCA 5.0.1 on the optimized structures using the PBE0 hybrid functional and the old-DKH-TZVPP all-electron basis set using the RIJCOSX approximation and the SARC/J auxiliary basis set.<sup>20-23</sup> The effects of relativity were introduced using the second-order Douglas-Kroll-Hess formalism (DKH).<sup>15</sup> Single point energy calculations were used to generate wavefunctions that were subject to topological and Natural Bond Orbital (NBO) analyses. Topological analysis of the electron density was performed in MultiWFN (version 3.7).<sup>24</sup> Bond paths were visualized in MultiWFN (version 3.7). The values of the real space functions  $\rho$ ,  $\nabla^2\rho$ , and  $\epsilon$  along interatomic vectors were visualized using R (version 4.0.2) through RStudio (version 1.3.1073). The following R packages were used for analysis and visualization: ggplot2, tidyverse, gridExtra, ggtext, scales, ggbreak, and grid.<sup>25</sup> NBO analysis was performed using the NBO program (version 7.0.7).<sup>26</sup> Non-covalent interactions (NCI) were calculated using MultiWFN and the results were visualized in VMD.<sup>27, 28</sup>

**pK<sub>a</sub> determination from titration data.** The observed chemical shift of the Pn-proximal benzylic proton resonance (the benzylic proton resonance that appears most downfield in pure pnictine oxide) was used to determine the percentage of deprotonated pnictine oxide in solution according to Equation 1. The percentage of pnictine oxide in solution, the initial moles of hydroxyphosphonium in the sample, and the total volume can be used to determine the concentrations of pnictine oxide, hydroxyphosphonium, free base titrant, and protonated titrant in the sample according to Equations 2-7. The equilibrium constant of Equations 8 and 9 ( $K_8$ ) was obtained by non-linear regression of the data by the nls function in R of Equation 10. The known pK<sub>a</sub> value of the titrant was then used to determine the pK<sub>a</sub> of hydroxyphosphonium, following equations 11-20.

1. 
$$\frac{[\text{PnO}]}{[\text{PnO}] + [\text{PnOH}^+]} = \frac{\delta(\text{observed}) - \delta(\text{PnOH}^+)}{\delta(\text{PnO}) - \delta(\text{PnOH}^+)}$$
2. 
$$\text{Base} + \text{PnOH}^+ \rightleftharpoons \text{PnO} + \text{BaseH}^+$$
3. 
$$\text{mole PnO} = \text{mole PnOH}^+_0 * \frac{[\text{PnO}]}{[\text{PnO}] + [\text{PnOH}^+]}$$
4. 
$$[\text{PnO}] = \frac{\text{mole PnO}}{\text{Total Volume}}$$
5. 
$$[\text{PnOH}^+] = \frac{\text{mole PnOH}^+_0 - \text{mole PnO}}{\text{Total Volume}}$$
6. 
$$[\text{Base}] = \frac{\text{mole Based added} - \text{mole PnO}}{\text{Total Volume}}$$
7. 
$$[\text{BaseH}^+] = [\text{PnO}]$$
8. 
$$K_8 = \frac{[\text{PnO}][\text{BaseH}^+]}{[\text{Base}][\text{PnOH}^+]}$$
9. 
$$K_8 = \frac{[\text{PnO}]^2}{[\text{Base}][\text{PnOH}^+]}$$
10. 
$$[\text{PnO}] = \sqrt{K_8[\text{Base}][\text{PnOH}^+]}$$
11. 
$$\text{PnOH}^+ \rightleftharpoons \text{PnO} + \text{H}^+$$
12. 
$$\text{Base} + \text{H}^+ \rightleftharpoons \text{BaseH}^+$$
13. 
$$\Delta G_8 = \Delta G_{11} + \Delta G_{12}$$
14. 
$$-RT \ln K_8 = -RT \ln K_{11} + (-RT \ln K_{12})$$
15. 
$$\ln K_8 = \ln(K_{11} K_{12})$$
16. 
$$K_8 = K_{11} K_{12}$$
17. 
$$\frac{K_8}{K_{12}} = K_{11}$$
18. 
$$K_a = 10^{-\text{p}K_a}$$
19. 
$$K_{12} = \frac{1}{10^{-\text{p}K_a \text{ of base}}}$$
20. 
$$\text{p}K_a \text{ of PnO} = -\log(K_{11})$$

**Discussion of intramolecular C–H activation product 3.** Compound **3** (Figure S55) is the result of the formal elimination of H<sub>2</sub> from **2c**. Although we were unable to independently synthesize **3**, its formation prompted a further investigation of the computationally optimized structures **1a-cH**<sup>+</sup>. As noted in the main text, the hydroxy groups of **1a-cH**<sup>+</sup> are buried to a greater or lesser extent within the pocket created by the Dipp groups. A close inspection of the intramolecular interactions in which these hydroxyl groups engage revealed that a dihydrogen bond between the protic H atom and a methyl H atom is present in each case; **1cH**<sup>+</sup> features the shortest computed OH...HC distance at 1.786 Å, suggesting a bond strength comparable to conventional hydrogen bonds.<sup>29</sup> Although the heavier congeners engage in similar hydroxy-methyl interactions, the OH group of **1cH**<sup>+</sup> uniquely features a bifurcated dihydrogen bonding interaction in which the benzylic H atom appears at 1.833 Å. Topological analysis of the theoretical electron density (DKH-PBE0/old-DKH-TZVPP) of the isolated **1a-cH**<sup>+</sup> cations confirms the presence of a bond critical point between the dihydrogen-bonding H atoms in each case. The magnitude of  $\rho$  at the bond critical point becomes smaller as the pnictogen becomes heavier (Figures S57-S59). Furthermore, non-covalent interaction analysis<sup>28</sup> of **1a-cH**<sup>+</sup> reveals singularities in the reduced density gradient between the dihydrogen-bonding H atoms, but only in **1cH**<sup>+</sup> do the dihydrogen bonds appear at a negative sign( $\lambda_2$ ) $\rho$ , indicating the strongest dihydrogen-bonding interaction in the series (Figure S60). As noted in the main text, natural population analysis reveals a systematic increase in the charge of the protic H atom from **1aH**<sup>+</sup> < **1bH**<sup>+</sup> < **1cH**<sup>+</sup>. The increasing trend in dihydrogen bond strength from **1aH**<sup>+</sup> < **1bH**<sup>+</sup> < **1cH**<sup>+</sup> can be rationalized by multiple factors. First, the lower Brønsted basicity of the O atom in **1c** attenuates charge transfer to the proton, thus the corresponding O–H group of **1cH**<sup>+</sup> is a more polarized, potent H-bond donor. Second, as the pnictogen becomes smaller, the Dipp groups impose greater steric pressure on the hydroxyl group, shielding the hydroxyl group from intermolecular, stabilizing H-bonding interactions and positioning the isopropyl substituents in close contact with the protic H atom. Importantly, we verified that the dihydrogen bonding is not only present in the computed structures, but that it is borne out in the crystallography as well. Specifically, in the structure of **2c**, the triflate anion cannot donate to the extremely protic H atom because of the steric shielding from the Dipp groups, but an isopropyl substituent is poised to act as an H-bond acceptor. It is noteworthy that this arrangement is observed in both of the crystallographically independent units of the hydroxyphosphonium cation present in the crystal structure. The dihydrogen bond can be thought of as a pre-arrangement necessary for the reaction whereby **2c** produces **3** and H<sub>2</sub>. Energetic analysis of the elimination of H<sub>2</sub> from cations **1a-cH**<sup>+</sup> to form cyclized alkoxyphosphonium cations **3**<sup>+</sup>(Sb), **3**<sup>+</sup>(As), and **3**<sup>+</sup>, respectively, was performed computationally (Table S1). In all cases,  $\Delta G_{rxn} > 0$ , but the lowest positive number was obtained in the case of **1cH**<sup>+</sup>, consistent with the crystallographic observation of **3** but not the As or Sb analogs. Although the variations in Brønsted basicity/acidity that are the focus of this paper have informed our initial interpretation of this result as arising from a closed-shell process, we highlight that the final product could also be obtained via an open-shell mechanism. We have tried repeatedly to effect this transformation on a preparative scale without success, but efforts in this direction are ongoing.



## References

1. M. Warsitz and S. Doye, *Chem.–Eur. J.*, 2020, **26**, 15121-15125.
2. K. Li, A. E. Weber, L. Tseng and S. J. Malcolmson, *Org. Lett.*, 2017, **19**, 4239-4242.
3. D. Chakraborty and R. Das, *Synthesis*, 2011, **2011**, 1621-1625.
4. Rigaku Oxford Diffraction, *CrysAlis<sup>Pro</sup>*, 2020.
5. G. M. Sheldrick, *Acta Crystallogr. Sect. A*, 2015, **71**, 3-8.
6. G. M. Sheldrick, *Acta Crystallogr. Sect. C*, 2015, **71**, 3-8.
7. P. Müller, *Crystallogr. Rev.*, 2009, **15**, 57-83.
8. F. Kleemiss, O. V. Dolomanov, M. Bodensteiner, N. Peyerimhoff, L. Midgley, L. J. Bourhis, A. Genoni, L. A. Malaspina, D. Jayatilaka, J. L. Spencer, F. White, B. Grundkötter-Stock, S. Steinhauer, D. Lentz, H. Puschmann and S. Grabowsky, *Chem. Sci.*, 2021, **12**, 1675-1692.
9. F. Neese, *Wiley Interdiscip. Rev.-Comput. Mol. Sci.*, 2012, **2**, 73-78.
10. F. Neese, *WIREs Comput. Mol. Sci.*, 2018, **8**, e1327.
11. F. Weigend and R. Ahlrichs, *Phys. Chem. Chem. Phys.*, 2005, **7**, 3297-3305.
12. J. P. Perdew, M. Ernzerhof and K. Burke, *J. Chem. Phys.*, 1996, **105**, 9982-9985.
13. J. P. Perdew, K. Burke and M. Ernzerhof, *Phys. Rev. Lett.*, 1996, **77**, 3865-3868.
14. P. Pollak and F. Weigend, *J. Chem. Theory Comput.*, 2017, **13**, 3696-3705.
15. A. Wolf, M. Reiher and B. A. Hess, *J. Chem. Phys.*, 2002, **117**, 9215-9226.
16. O. V. Dolomanov, L. J. Bourhis, R. J. Gildea, J. A. K. Howard and H. Puschmann, *J. Appl. Crystallogr.*, 2009, **42**, 339-341.
17. F. L. Hirshfeld, *Theor. Chim. Acta*, 1977, **44**, 129-138.
18. F. Weigend, *Phys. Chem. Chem. Phys.*, 2006, **8**, 1057.
19. F. Neese, F. Wennmohs, A. Hansen and U. Becker, *Chem. Phys.*, 2009, **356**, 98-109.
20. D. A. Pantazis, X.-Y. Chen, C. R. Landis and F. Neese, *J. Chem. Theory Comput.*, 2008, **4**, 908-919.
21. D. A. Pantazis and F. Neese, *J. Chem. Theory Comput.*, 2009, **5**, 2229-2238.
22. D. A. Pantazis and F. Neese, *J. Chem. Theory Comput.*, 2011, **7**, 677-684.
23. D. A. Pantazis and F. Neese, *Theor. Chem. Acc.*, 2012, **131**, 1292.
24. T. Lu and F. Chen, *J. Comput. Chem.*, 2012, **33**, 580-592.
25. S. Xu, M. Chen, T. Feng, L. Zhan, L. Zhou and G. Yu, *Front. Genet.*, 2021, **12**, 774846.
26. E. D. Glendening, C. R. Landis and F. Weinhold, *J. Comput. Chem.*, 2019, **40**, 2234-2241.
27. W. Humphrey, A. Dalke and K. Schulten, *J. Mol. Graph.*, 1996, **14**, 33-38.
28. E. R. Johnson, S. Keinan, P. Mori-Sánchez, J. Contreras-García, A. J. Cohen and W. Yang, *J. Am. Chem. Soc.*, 2010, **132**, 6498-6506.
29. H. Cybulski, E. Tyimińska and J. Sadlej, *ChemPhysChem*, 2006, **7**, 629-639.

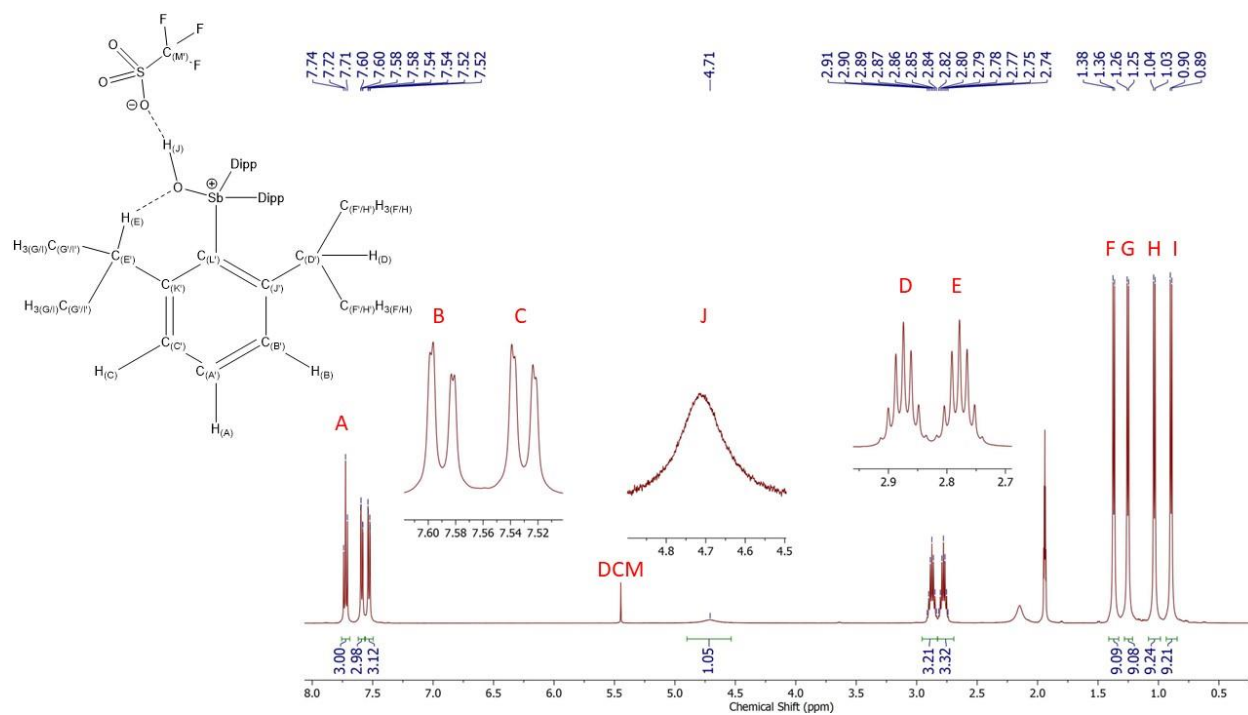

Figure S1.  $^1\text{H}$  NMR spectrum (CD<sub>3</sub>CN, 500 MHz) of **2a** at room temperature.

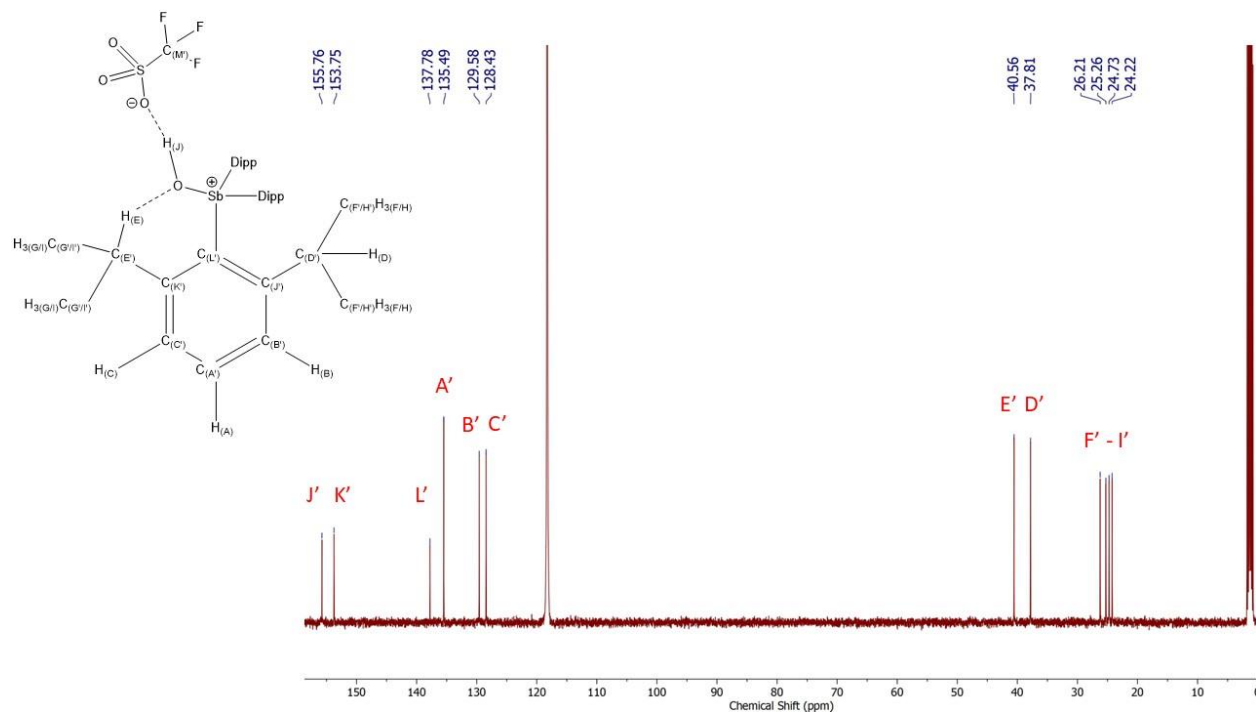

Figure S2.  $^{13}\text{C}\{^1\text{H}\}$  NMR spectrum (CD<sub>3</sub>CN, 125 MHz) of **2a** at room temperature.

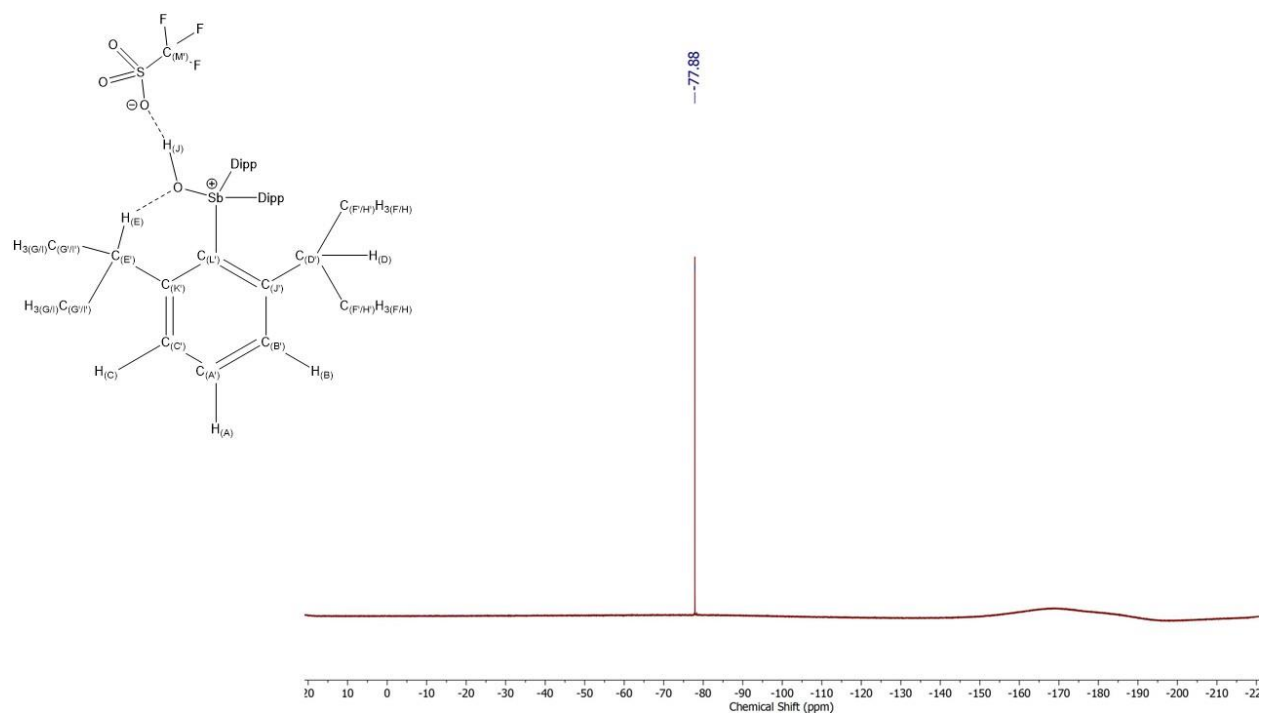

**Figure S3.**  $^{19}\text{F}$  NMR spectrum ( $\text{CDCl}_3$ , 470 MHz) of **2a** at room temperature.

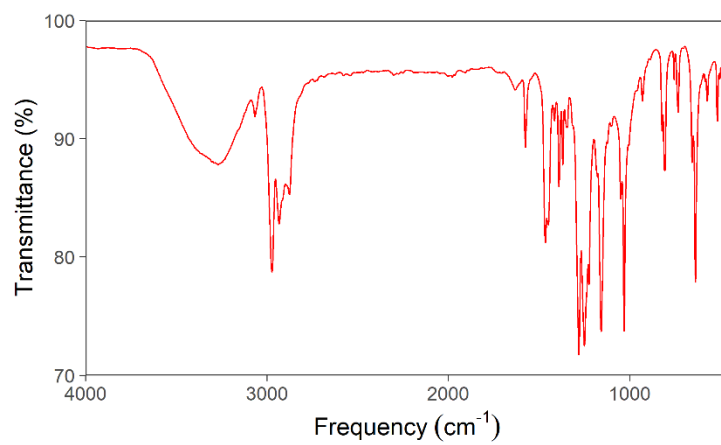

**Figure S4.** Experimental IR spectrum (KBr pellet) of **2a**.

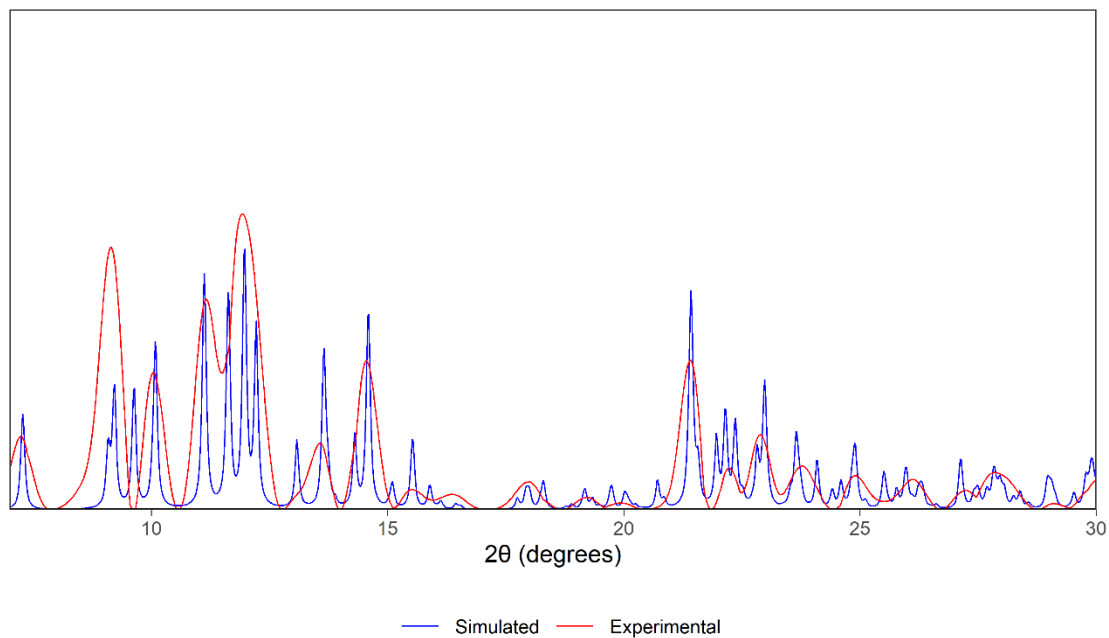

Figure S5. Simulated and experimental PXRD diffractograms of **2a**.

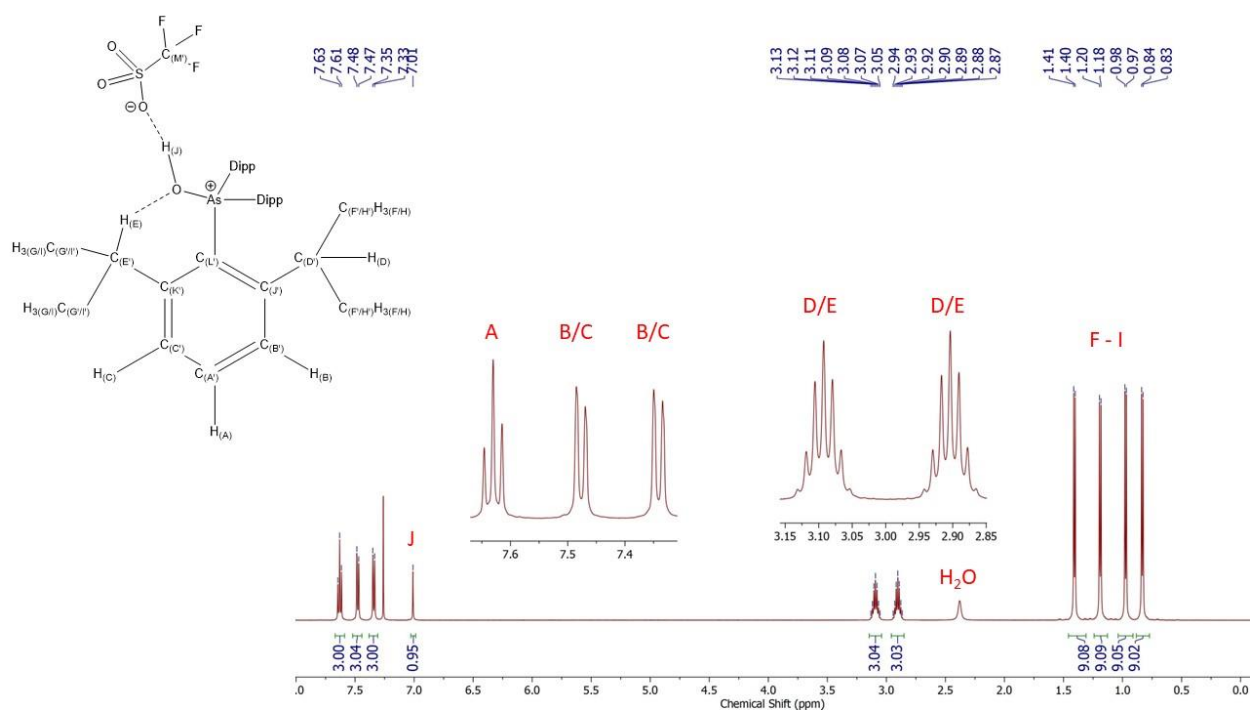

Figure S6.  $^1\text{H}$  NMR spectrum ( $\text{CDCl}_3$ , 500 MHz) of **2b**· $\text{CHCl}_3$  at room temperature.

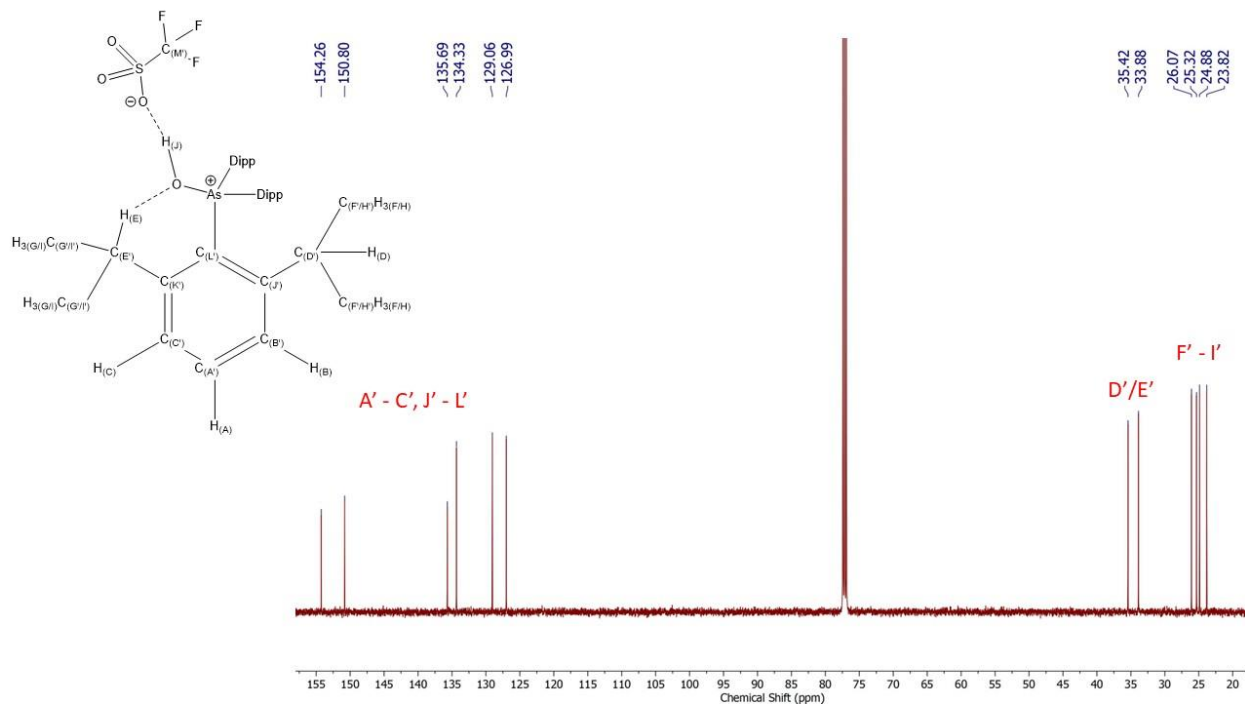

**Figure S7.** <sup>13</sup>C{<sup>1</sup>H} NMR spectrum (CDCl<sub>3</sub>, 125 MHz) of **2b**-CHCl<sub>3</sub> at room temperature.

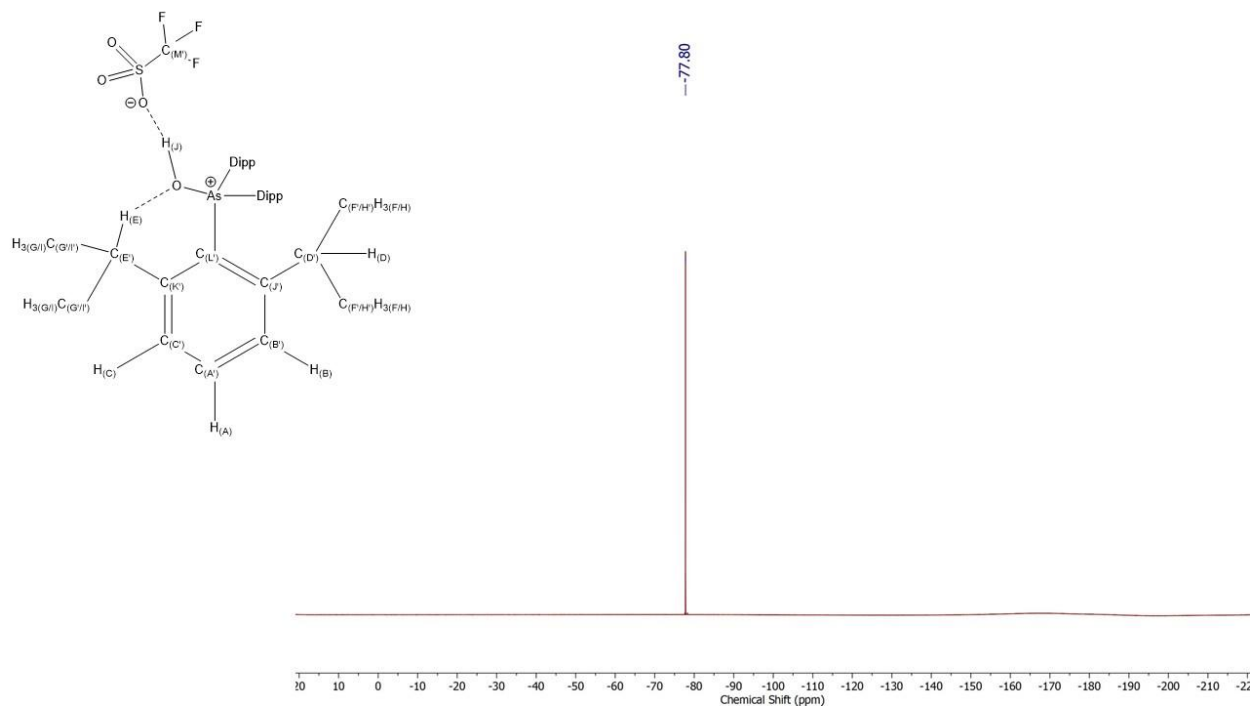

**Figure S8.** <sup>19</sup>F NMR spectrum (CDCl<sub>3</sub>, 470 MHz) of **2b**-CHCl<sub>3</sub> at room temperature.

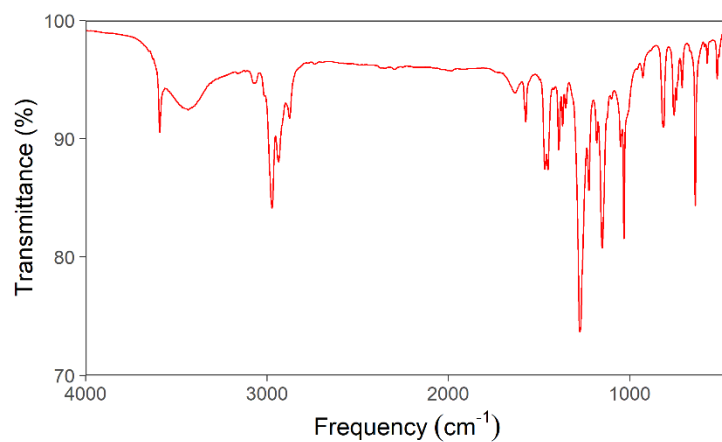

**Figure S9.** Experimental IR spectrum (KBr pellet) of **2b**·CHCl<sub>3</sub>.

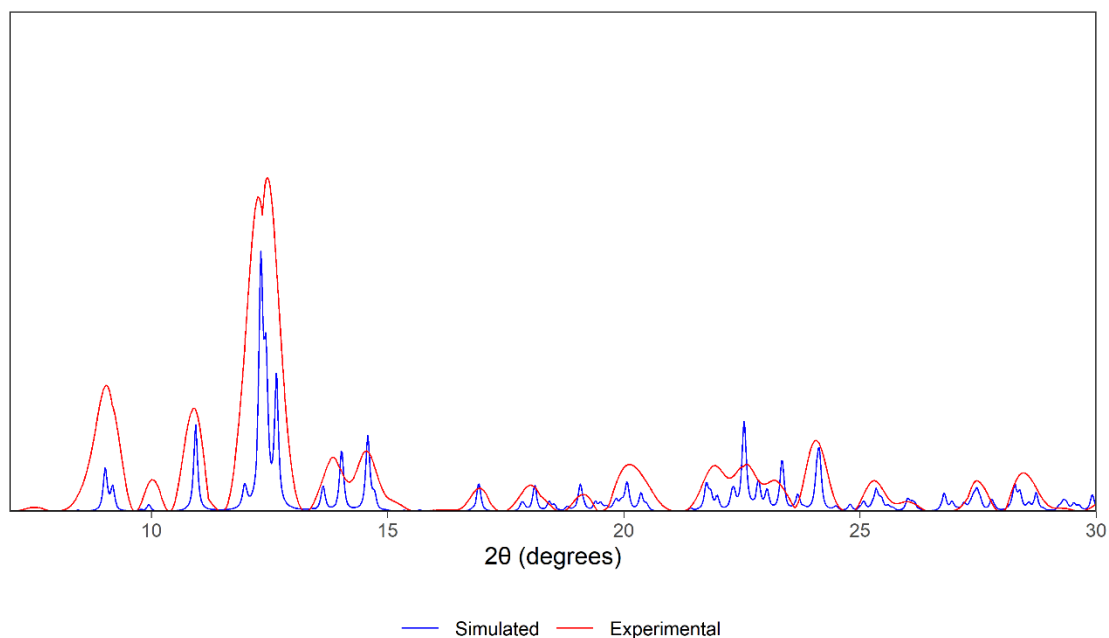

**Figure S10.** Simulated and experimental PXRD diffractogram of **2b**·CHCl<sub>3</sub>. The simulated diffractogram is of the triclinic polymorph of **2b**·CHCl<sub>3</sub>.

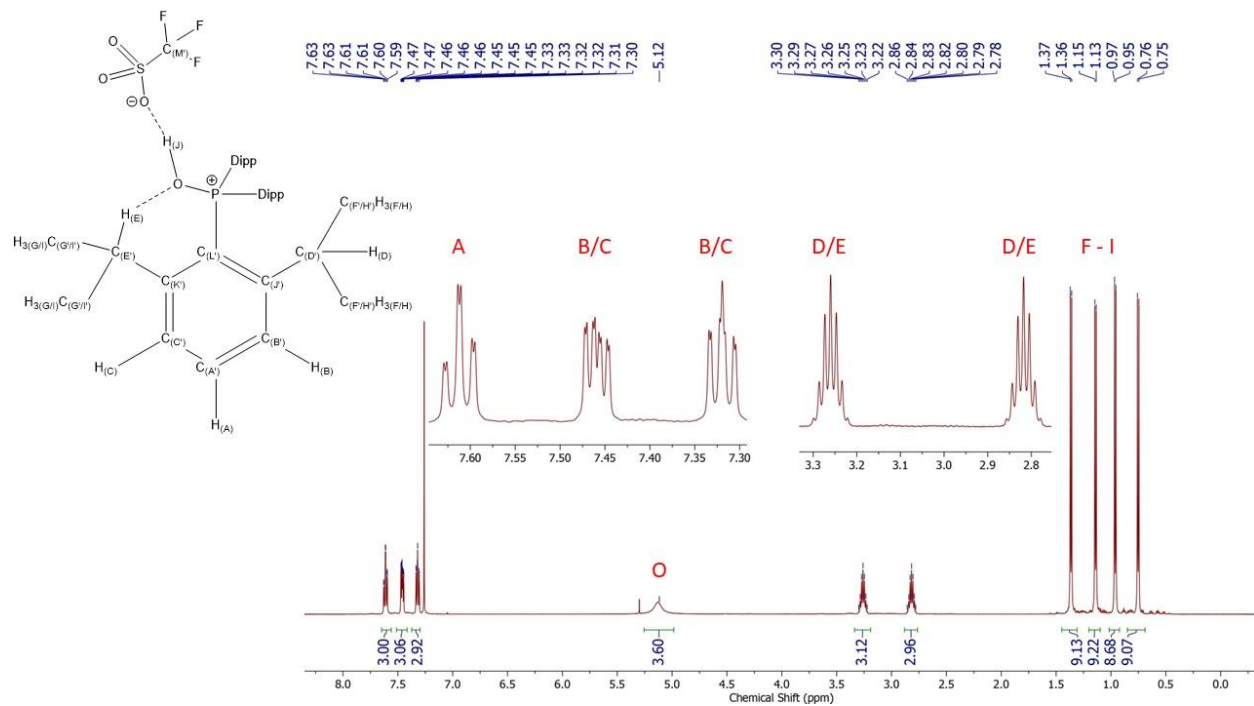

**Figure S11.**  $^1\text{H}$  NMR spectrum ( $\text{CDCl}_3$ , 500 MHz) of **2c** at room temperature.

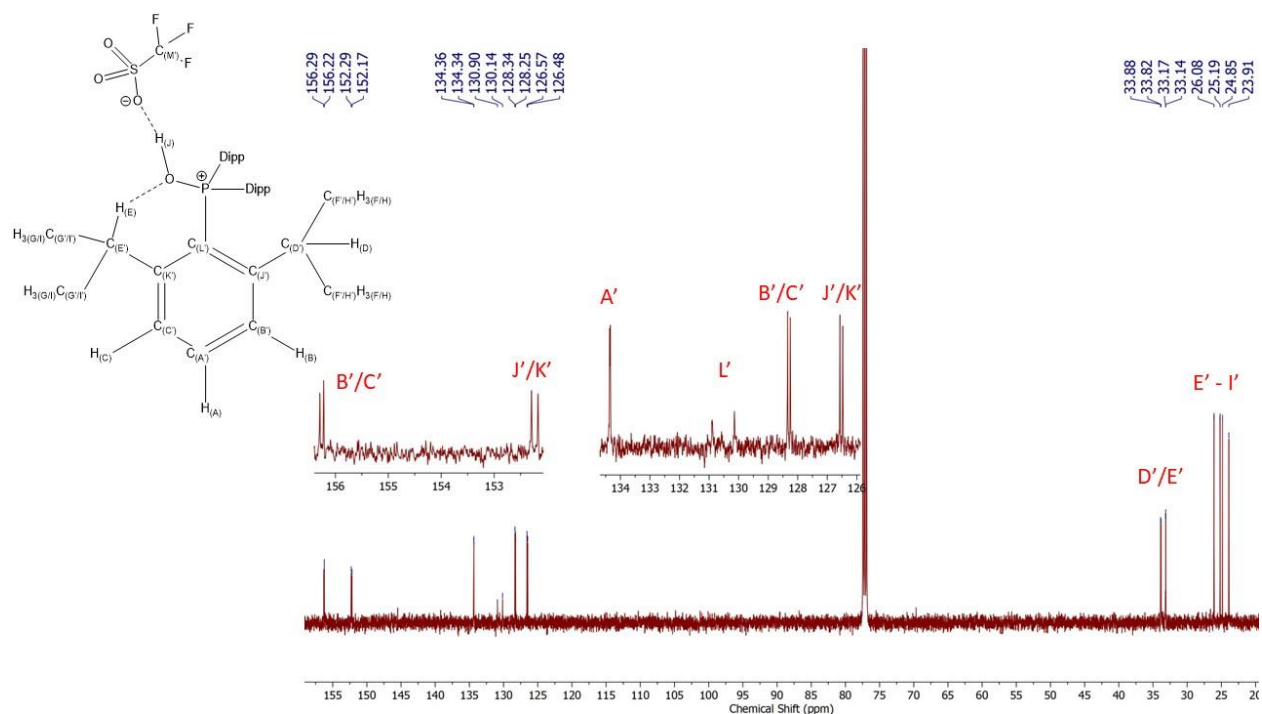

**Figure S12.**  $^{13}\text{C}\{^1\text{H}\}$  NMR spectrum ( $\text{CDCl}_3$ , 125 MHz) of **2c** at room temperature. Aryl signals were assigned positions relative to  $^{31}\text{P}$  nucleus based on coupling constants.

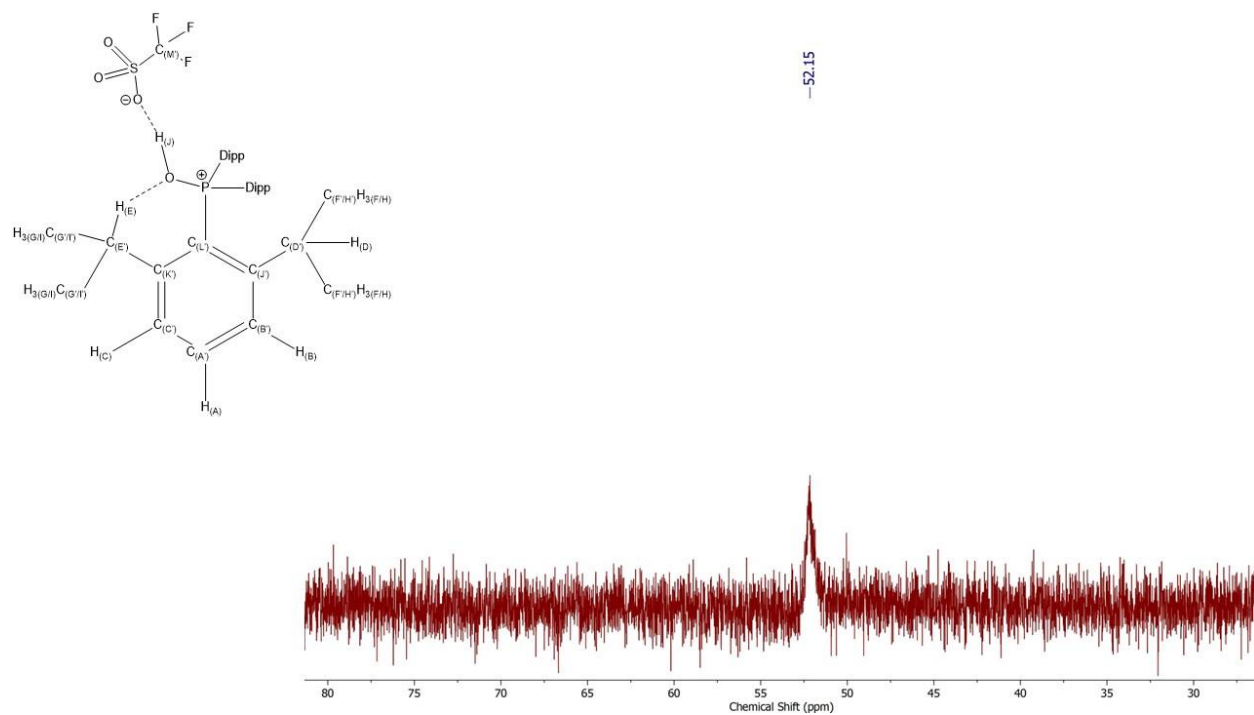

**Figure S13.**  $^{31}\text{P}$  NMR spectrum ( $\text{CDCl}_3$ , 470 MHz) of **2c** at room temperature.

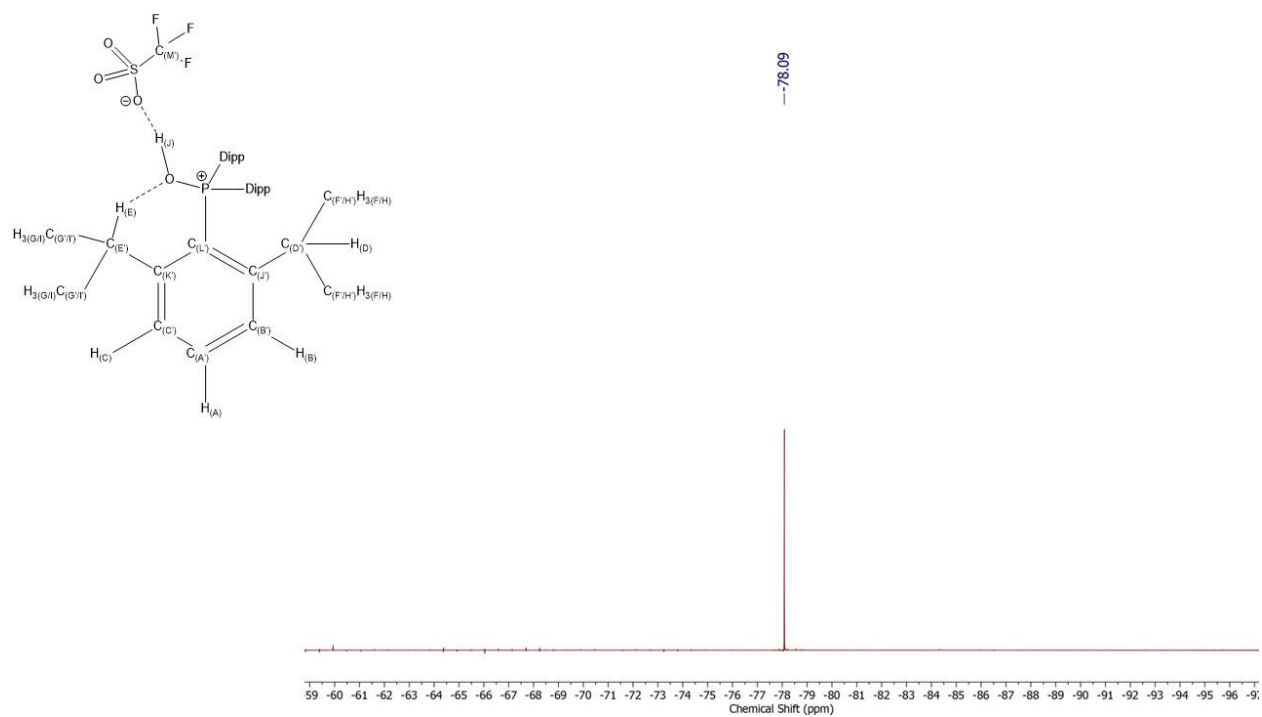

**Figure S14.**  $^{19}\text{F}$  NMR spectrum ( $\text{CDCl}_3$ , 470 MHz) of **2c** at room temperature.



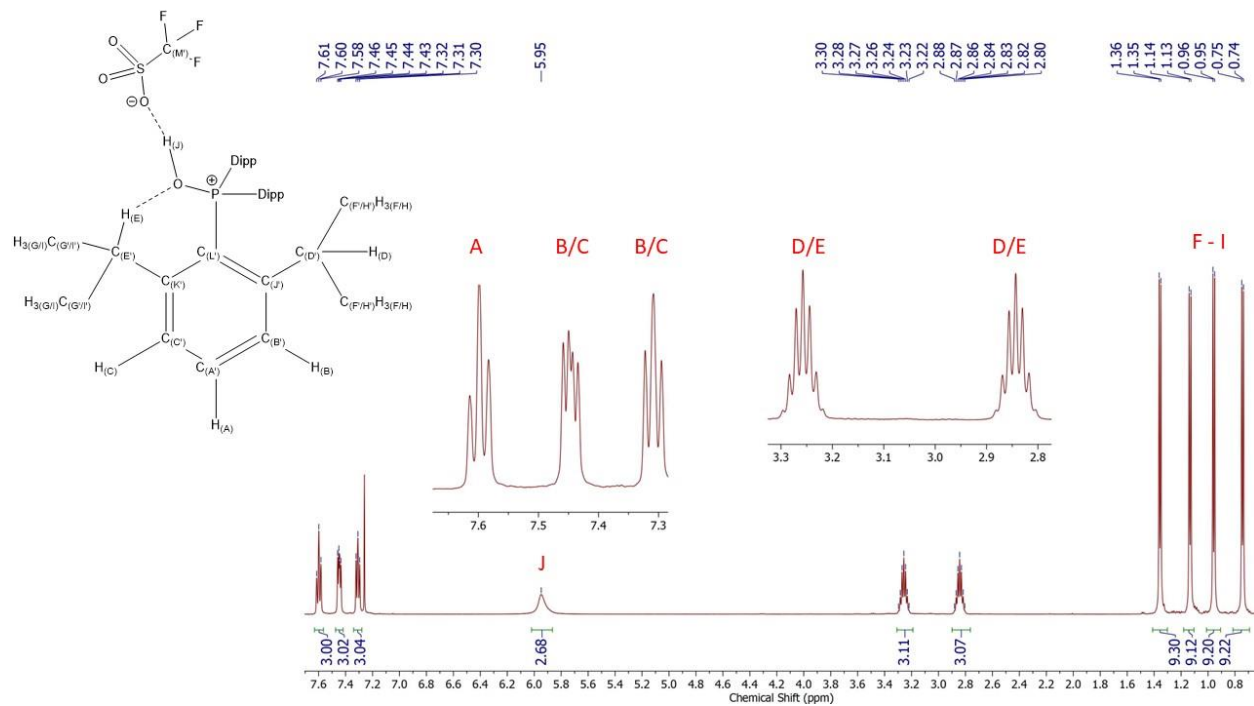

**Figure S15.**  $^1\text{H}$  NMR spectrum (CDCl<sub>3</sub>, 500 MHz) of a 1:1 mixture of **1c** and triflic acid at room temperature.

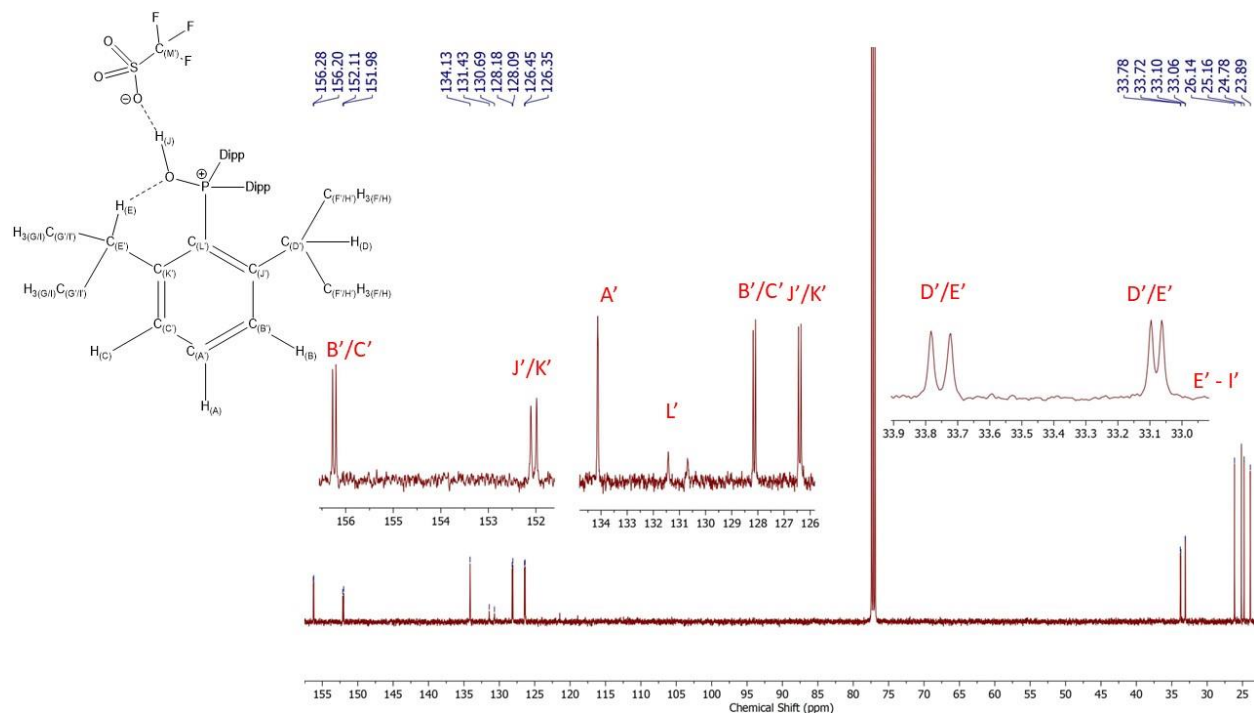

**Figure S16.**  $^{13}\text{C}\{^1\text{H}\}$  NMR spectrum (CDCl<sub>3</sub>, 125 MHz) of a 1:1 mixture of **1c** and triflic acid at room temperature. Aryl signals were assigned positions relative to  $^{31}\text{P}$  nucleus based on coupling constants.

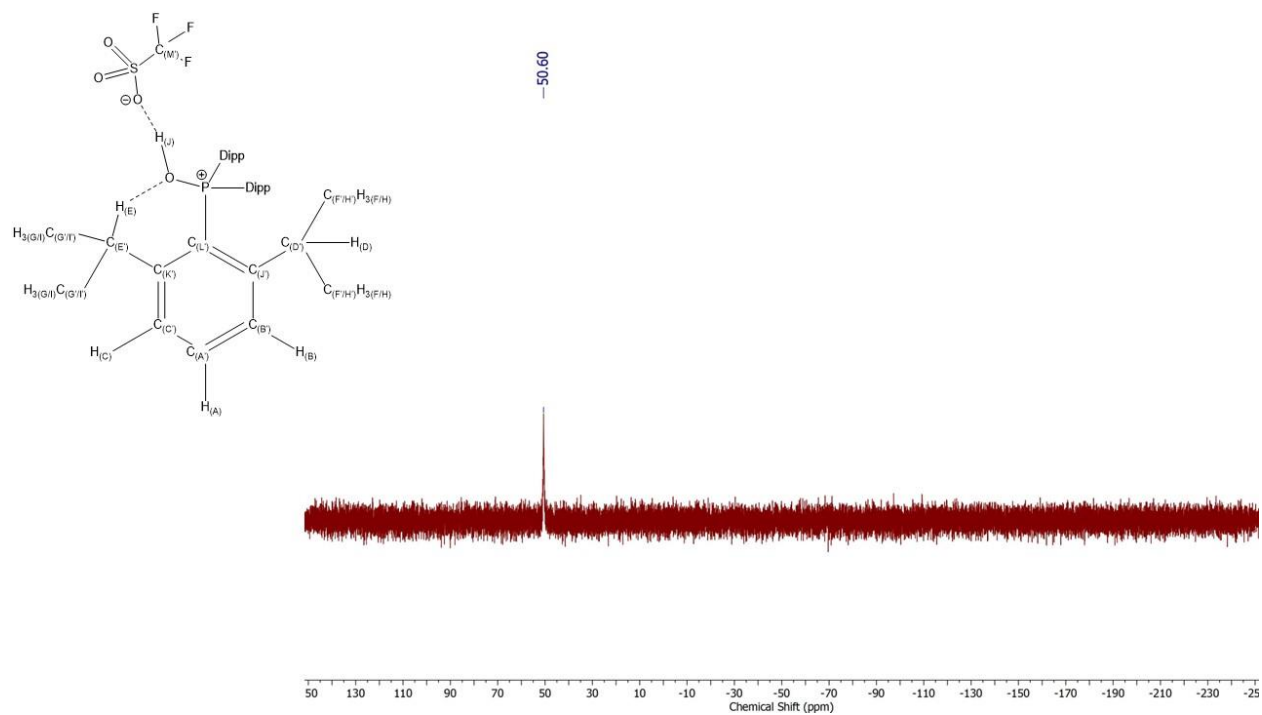

**Figure S17.**  $^{31}\text{P}$  NMR spectrum ( $\text{CDCl}_3$ , 470 MHz) of a 1:1 mixture of **1c** and triflic acid at room temperature.

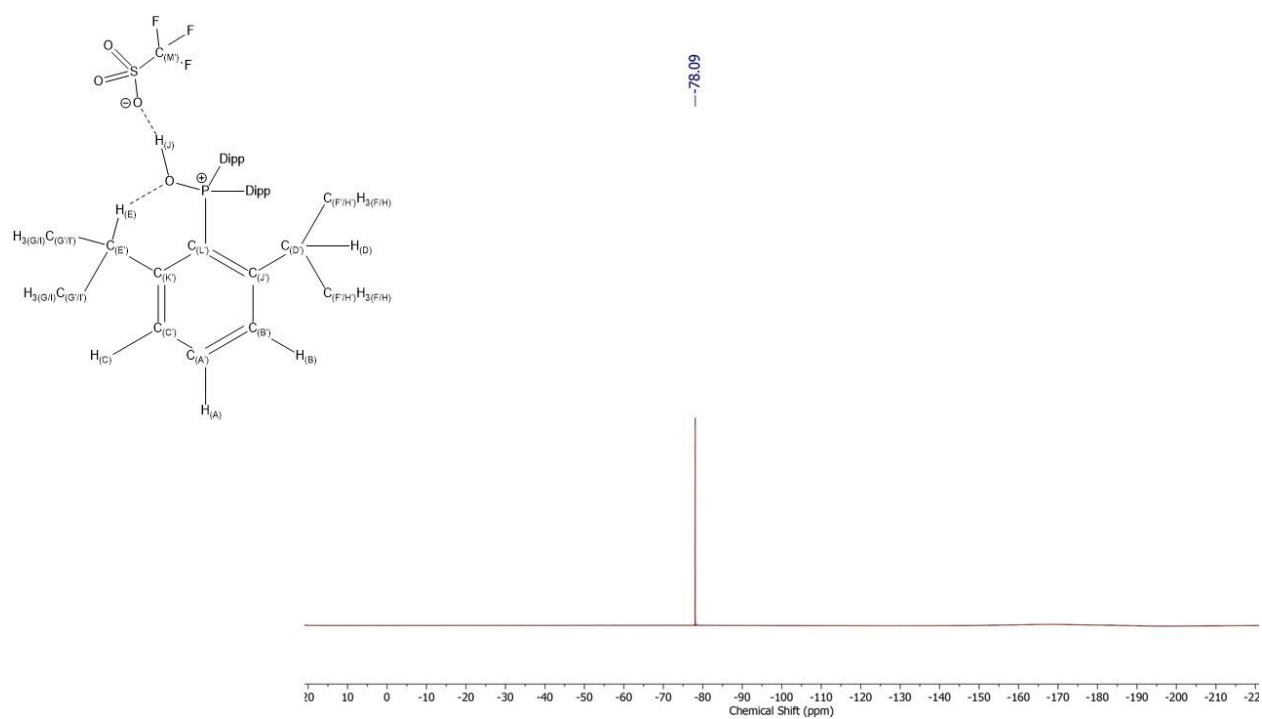

**Figure S18.**  $^{19}\text{F}$  NMR spectrum ( $\text{CDCl}_3$ , 470 MHz) of a 1:1 mixture of **1c** and triflic acid at room temperature.

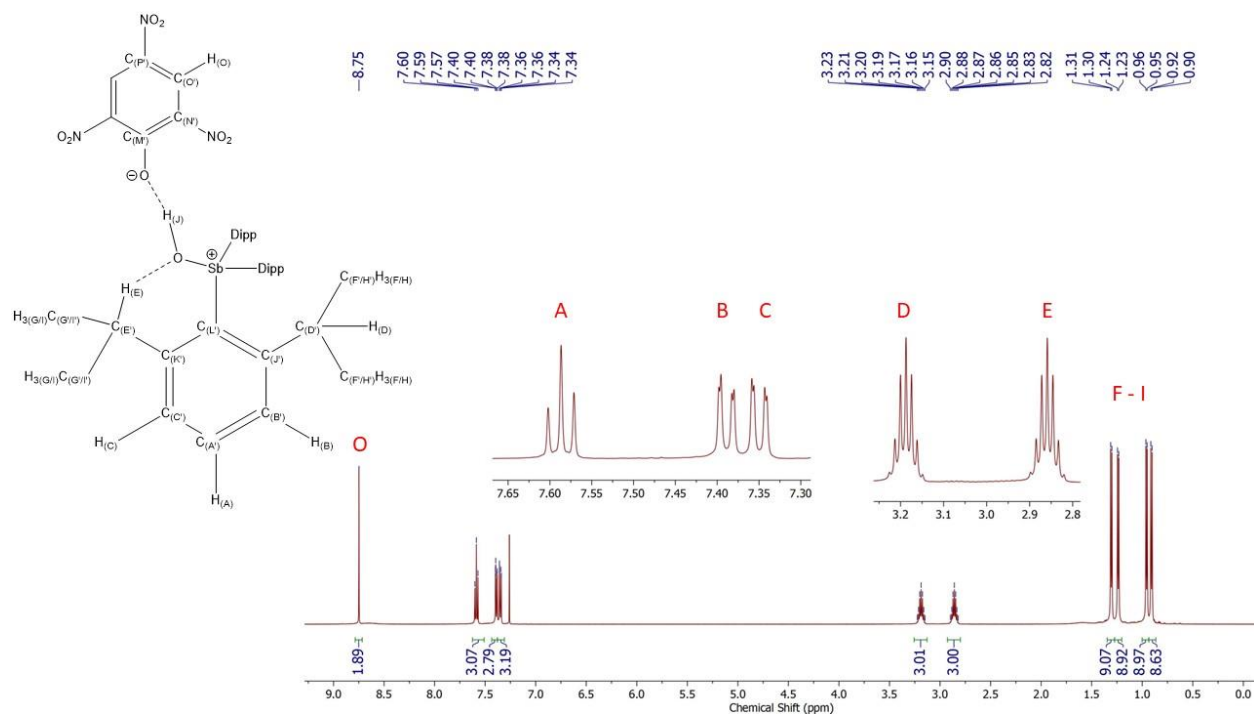

Figure S19.  $^1\text{H}$  NMR spectrum ( $\text{CDCl}_3$ , 500 MHz) of **4a** at room temperature.

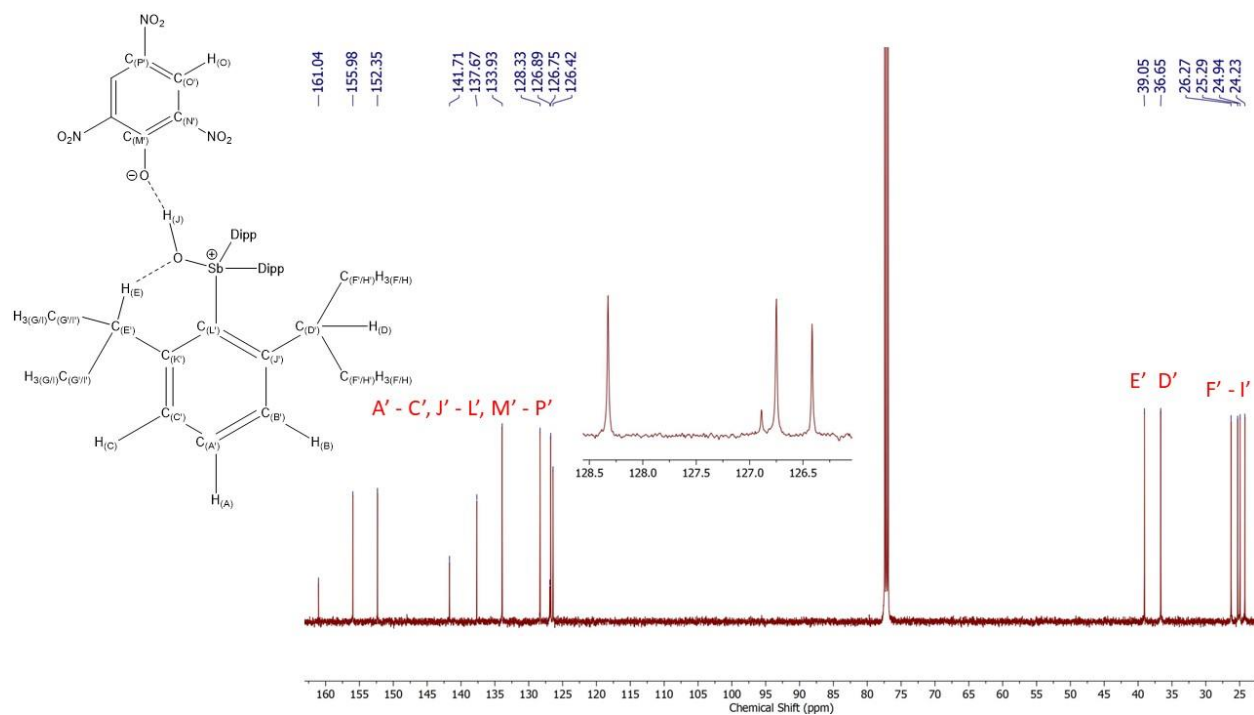

Figure S20.  $^{13}\text{C}\{^1\text{H}\}$  NMR spectrum ( $\text{CDCl}_3$ , 125 MHz) of **4a** at room temperature.

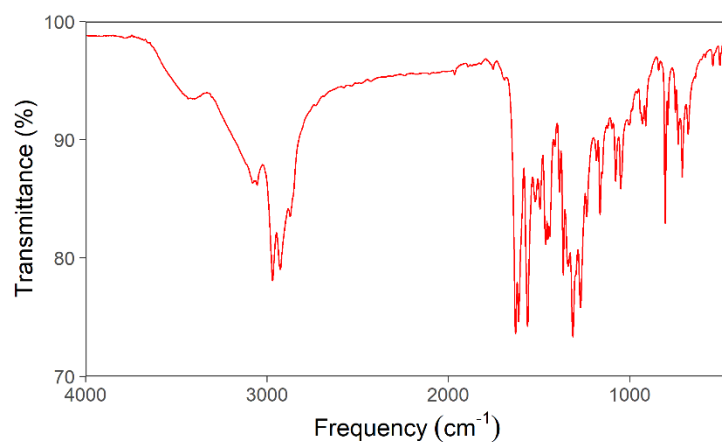

**Figure S21.** Experimental IR spectrum (KBr pellet) of **4a**.

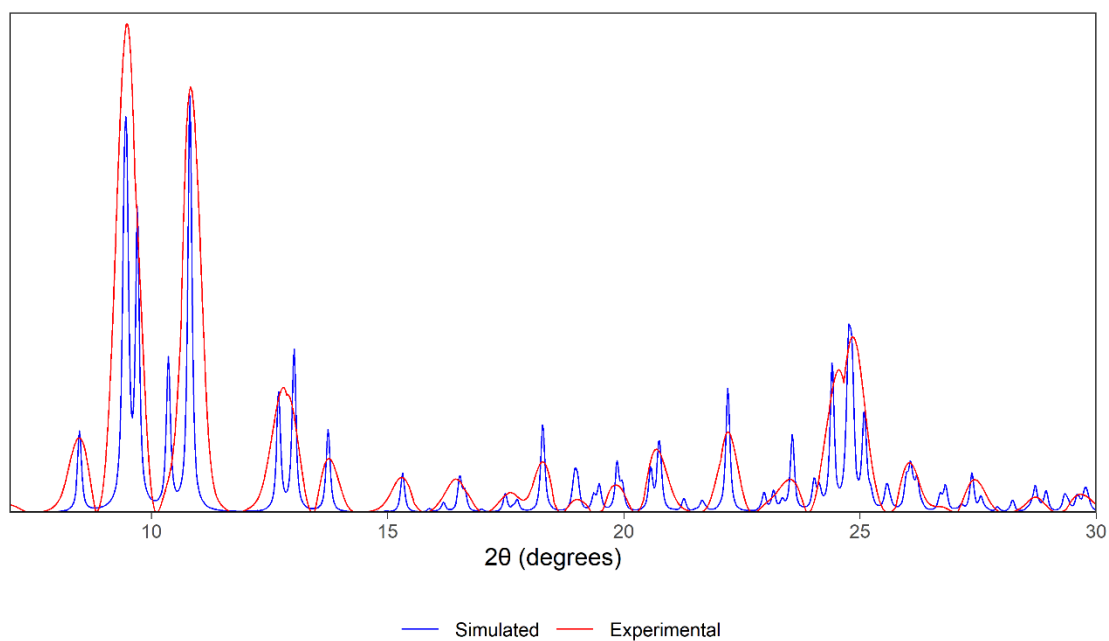

**Figure S22.** Simulated and experimental PXRD diffractogram of **4a**.

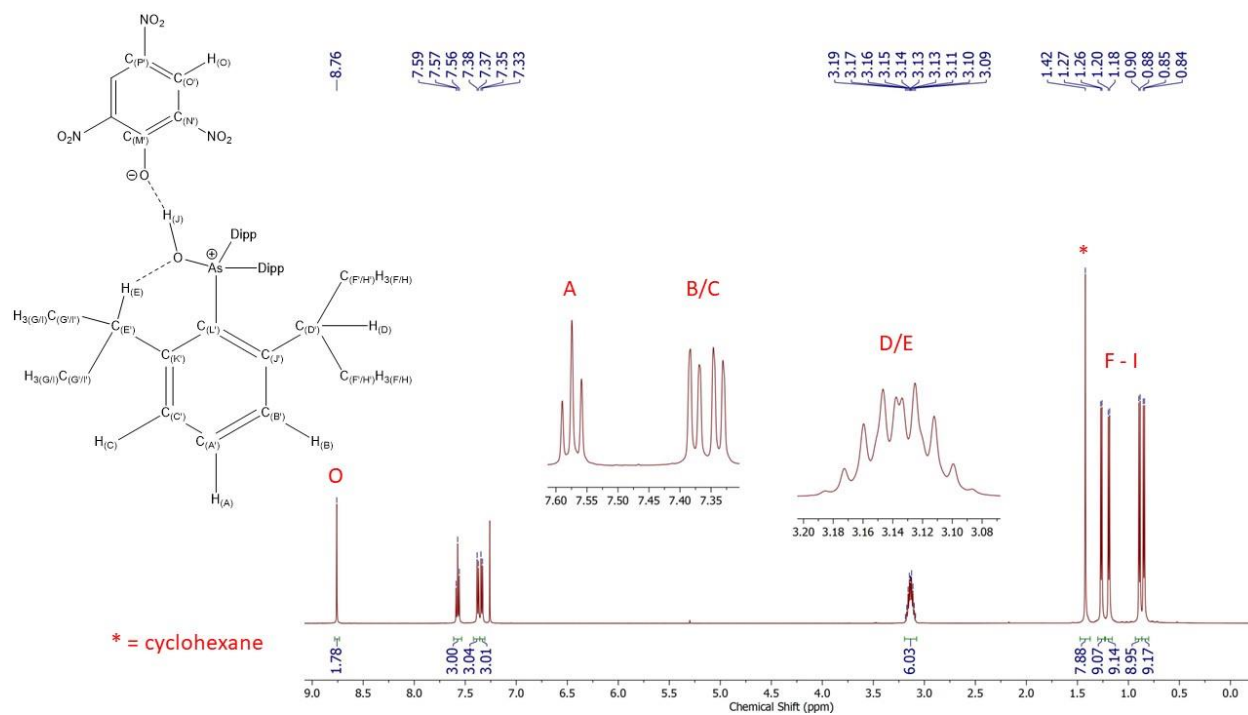

Figure S23.  $^1H$  NMR spectrum (CDCl<sub>3</sub>, 500 MHz) of  $4b \cdot \frac{3}{4}(C_6H_{12})$  at room temperature.

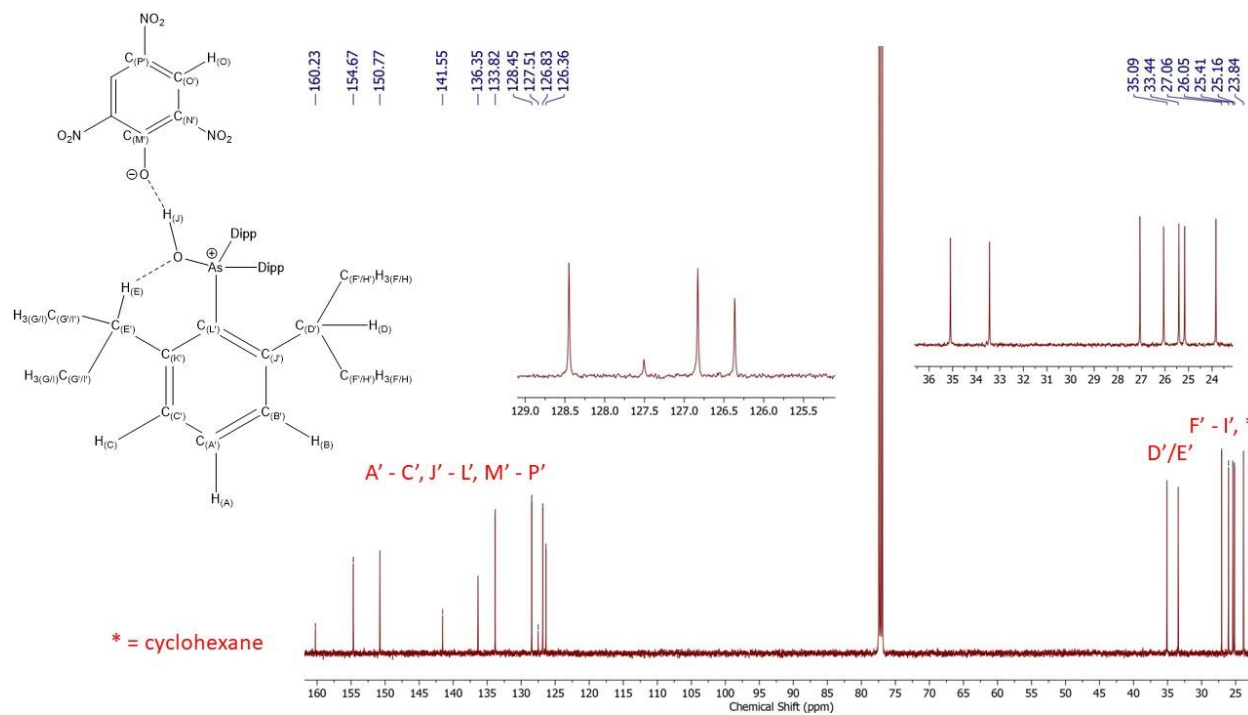

Figure S24.  $^{13}C\{^1H\}$  NMR spectrum (CDCl<sub>3</sub>, 125 MHz) of  $4b \cdot \frac{3}{4}(C_6H_{12})$  at room temperature.

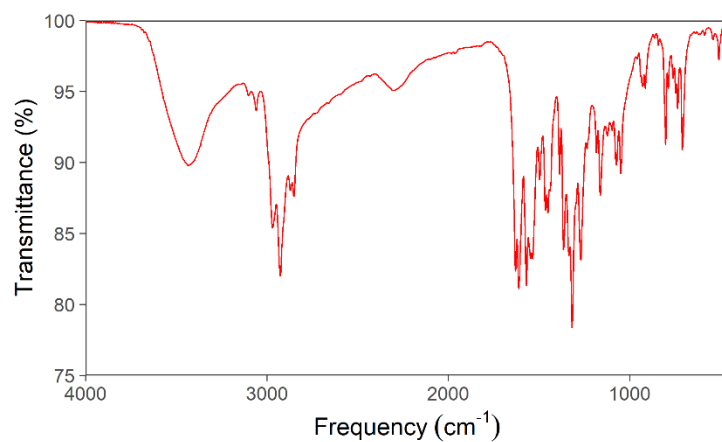

**Figure S25.** Experimental IR spectrum (KBr pellet) of  $4b \cdot \frac{3}{4}(C_6H_{12})$ .

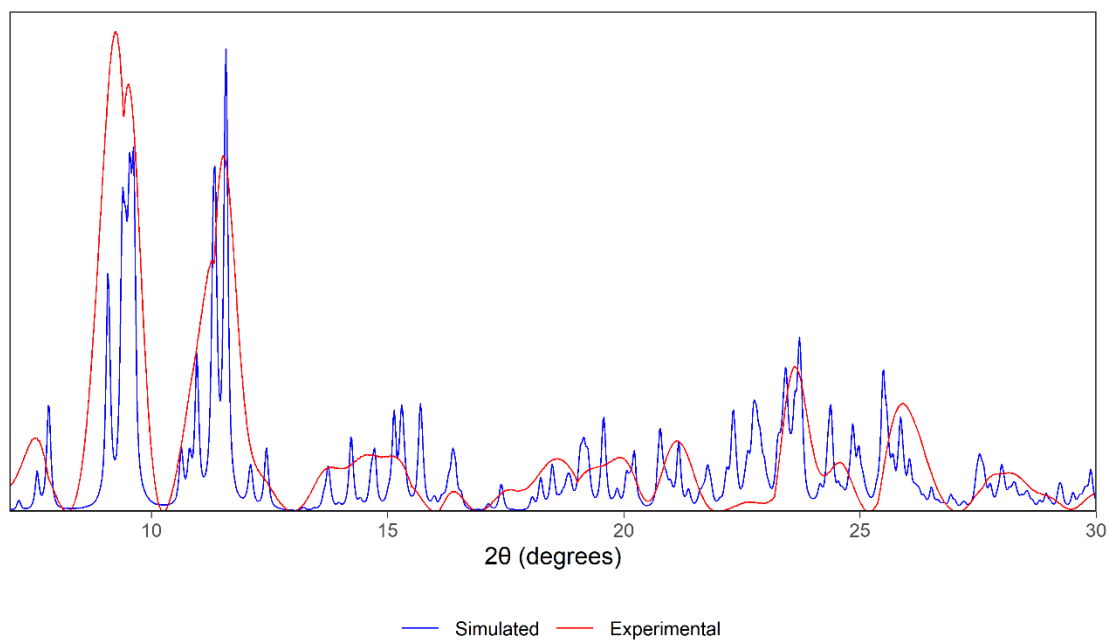

**Figure S26.** Simulated and experimental PXRD diffractogram of  $4b \cdot \frac{3}{4}(C_6H_{12})$ .

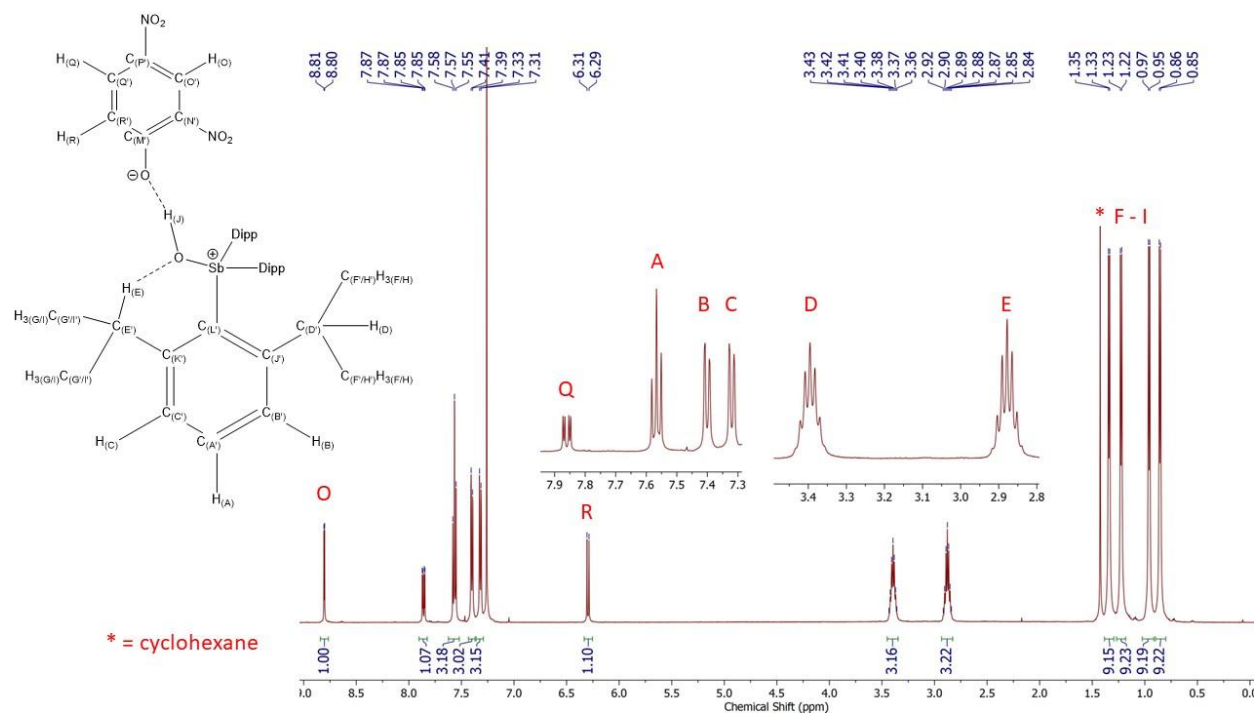

Figure S27. <sup>1</sup>H NMR spectrum (CDCl<sub>3</sub>, 500 MHz) of 5-2(CHCl<sub>3</sub>) at room temperature.

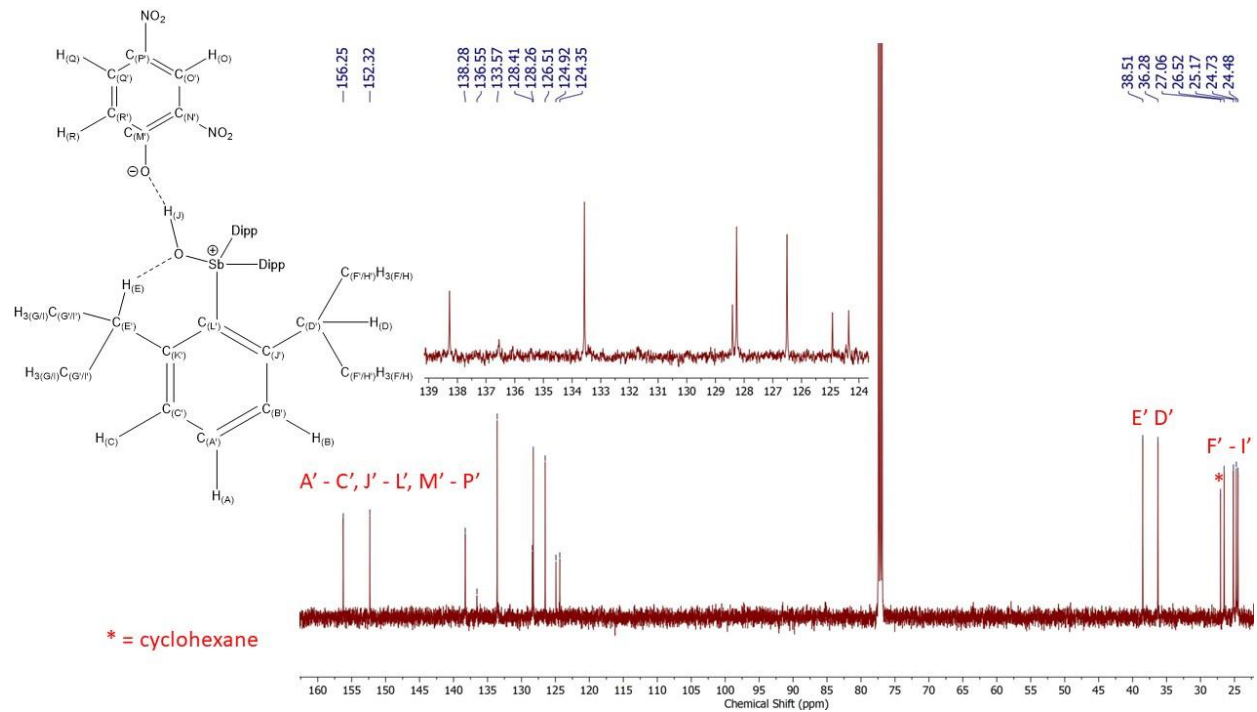

Figure S28. <sup>13</sup>C{<sup>1</sup>H} NMR spectrum (CDCl<sub>3</sub>, 125 MHz) of 5-2(CHCl<sub>3</sub>) at room temperature.

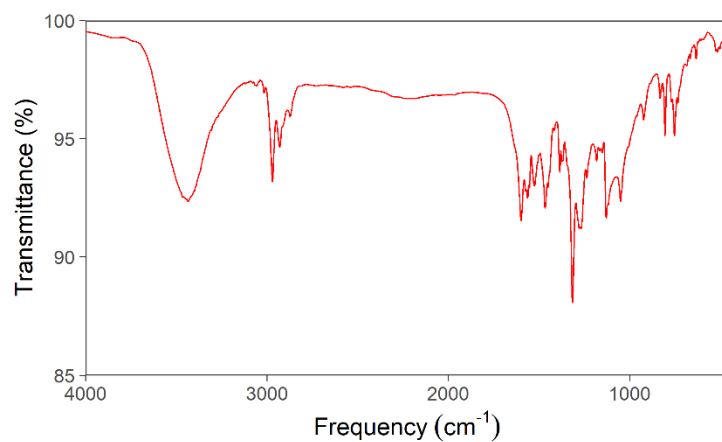

**Figure S29.** Experimental IR spectrum (KBr pellet) of 5·2(CHCl<sub>3</sub>).

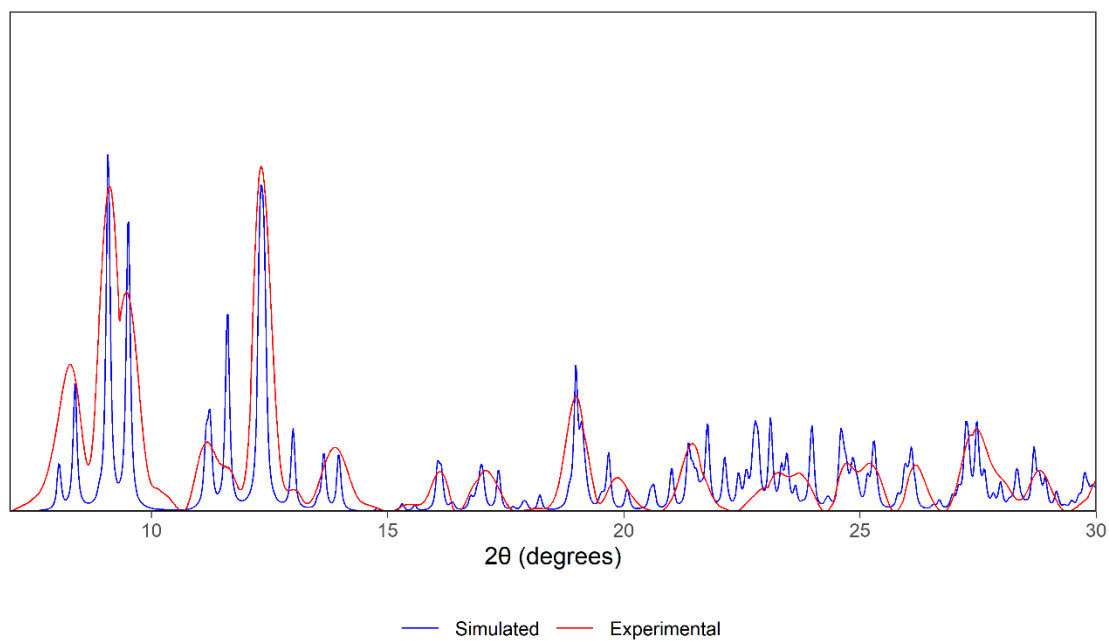

**Figure S30.** Simulated and experimental PXRD diffractogram of 5·2(CHCl<sub>3</sub>).



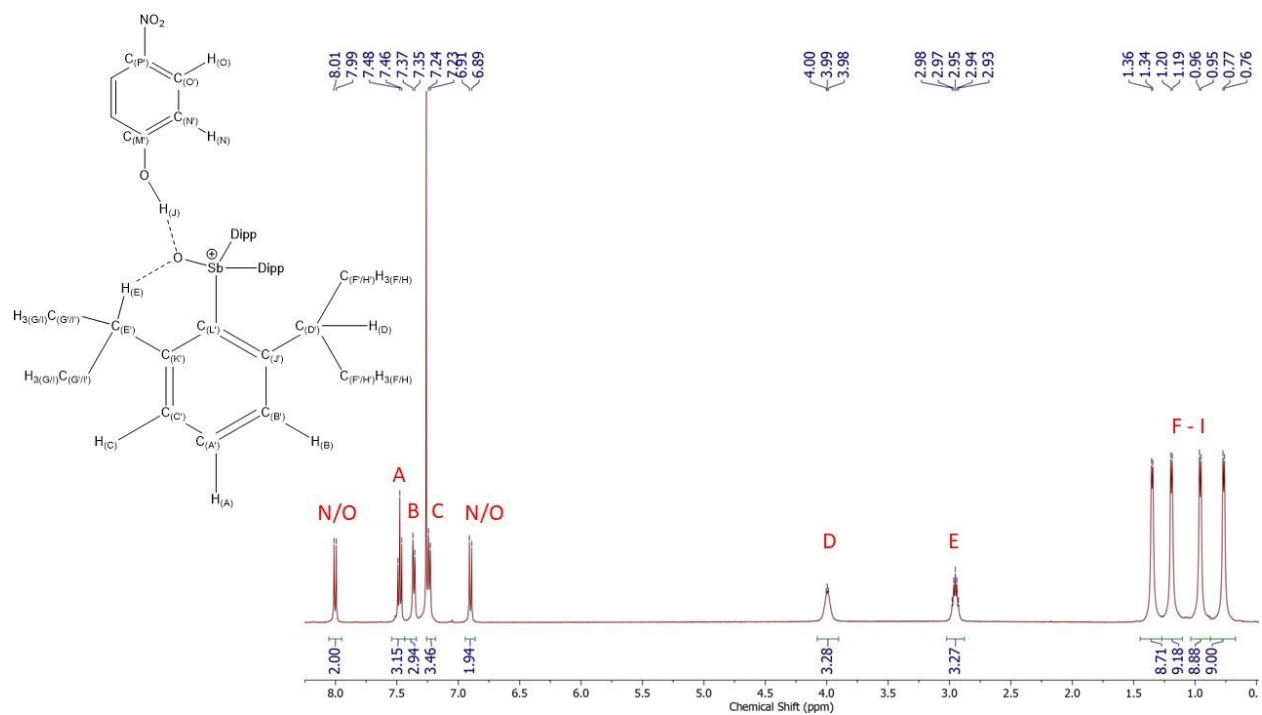

Figure S31.  $^1\text{H}$  NMR spectrum ( $\text{CDCl}_3$ , 500 MHz) of **6** at room temperature.

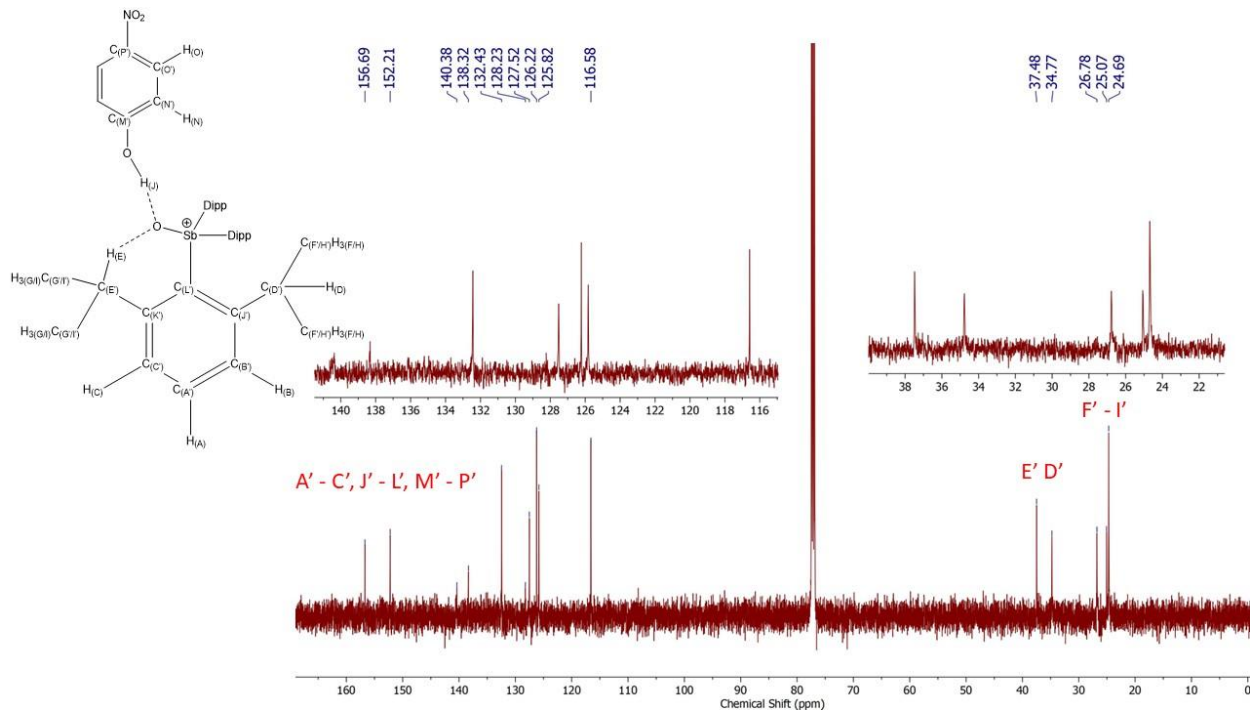

Figure S32.  $^{13}\text{C}\{^1\text{H}\}$  NMR spectrum ( $\text{CDCl}_3$ , 125 MHz) of **6** at room temperature.

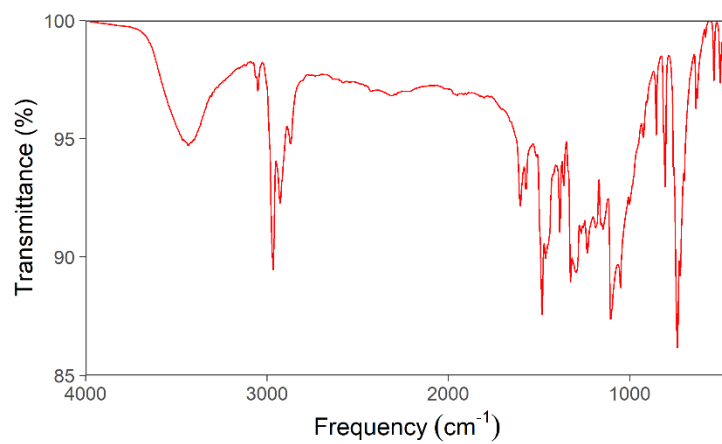

**Figure S33.** Experimental IR spectrum (KBr pellet) of **6**.

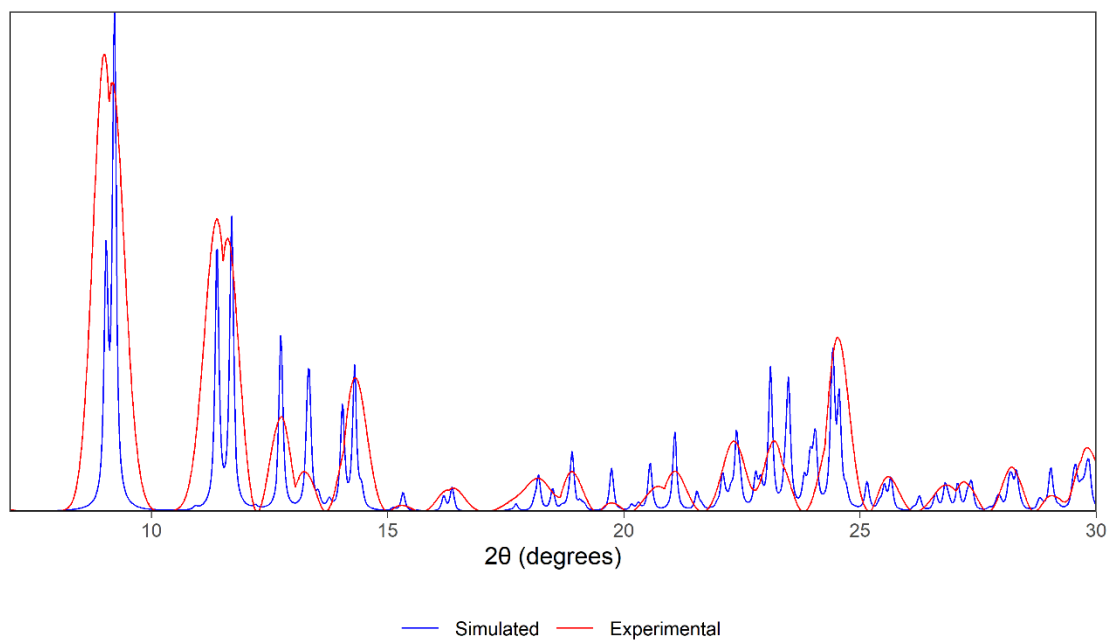

**Figure S34.** Simulated and experimental PXRD diffractogram of **6**.

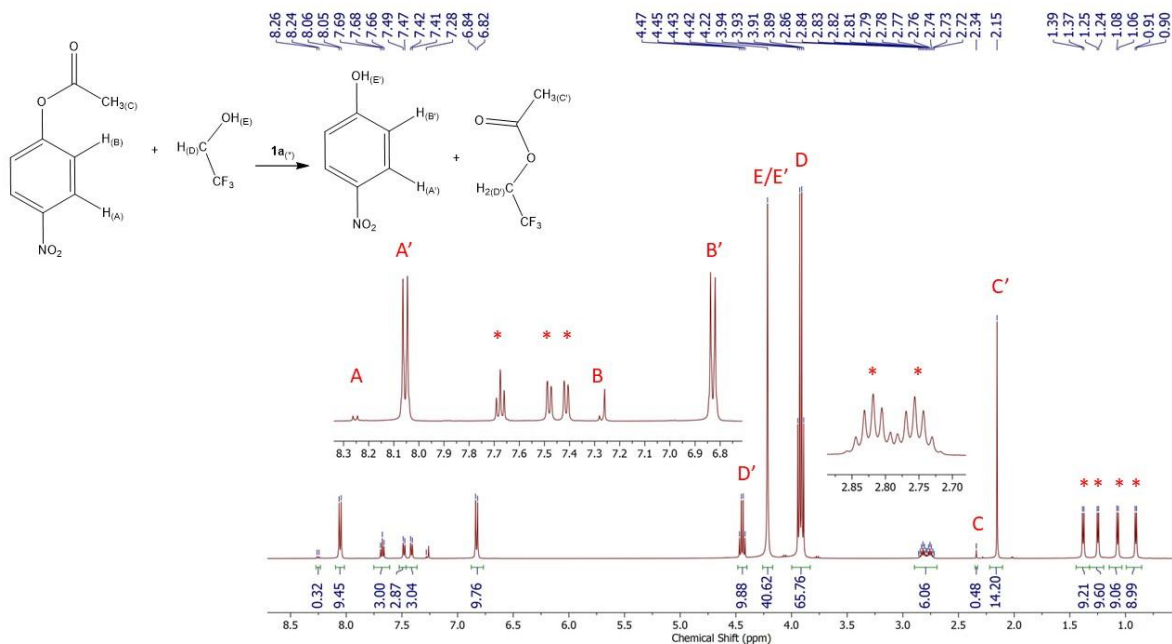

**Figure S35.**  $^1\text{H}$  NMR spectrum ( $\text{CDCl}_3$ , 500 MHz) of **1a**-catalyzed transesterification between *p*-nitrophenyl acetate and 2,2,2-trifluoroethanol reaction mixture at room temperature. Signals arising from pnicline oxide catalyst are denoted with an asterisk. The percent conversion was calculated by dividing the integral of peak C by the sum of the integrals of peaks A and A'. We note that a portion of the original 10 equivalents of 2,2,2-trifluoroethanol added to the mixture evaporated during the reaction.

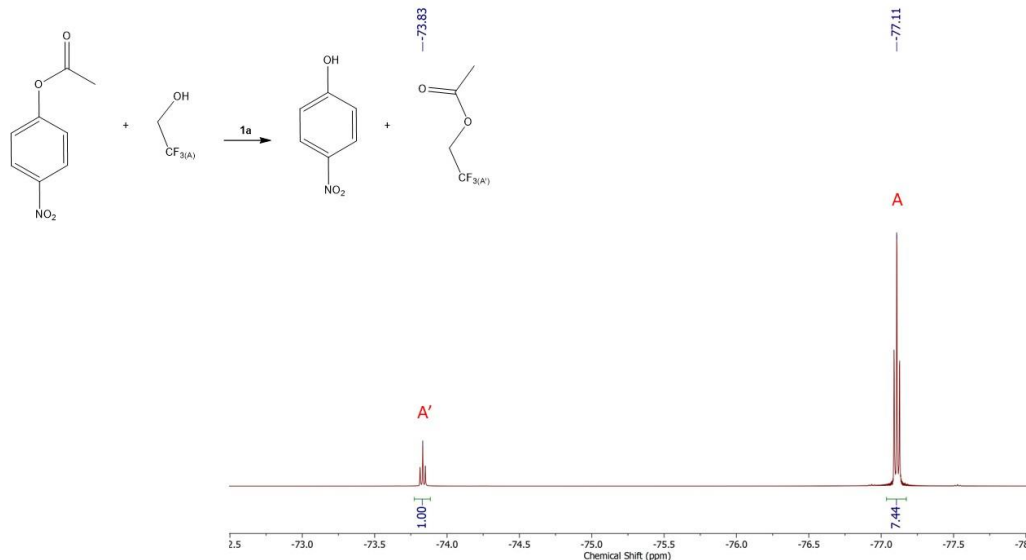

**Figure S36.**  $^{19}\text{F}$  NMR spectrum ( $\text{CDCl}_3$ , 470 MHz) of **1a**-catalyzed transesterification between *p*-nitrophenyl acetate and 2,2,2-trifluoroethanol reaction mixture at room temperature. We note that a portion of the original 10 equivalents of 2,2,2-trifluoroethanol added to the mixture evaporated during the reaction.

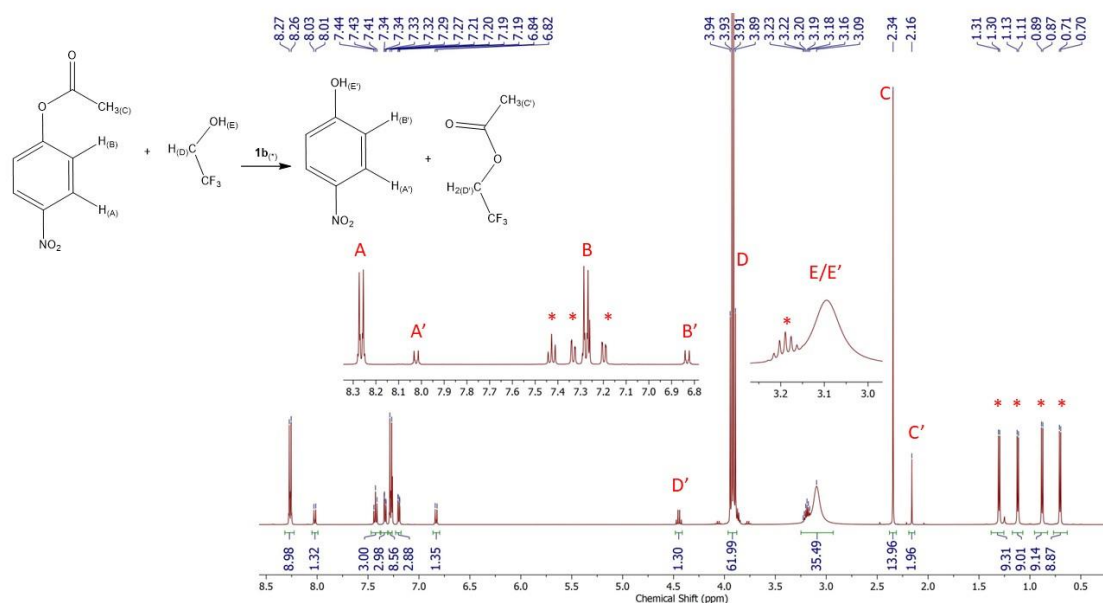

**Figure S37.**  $^1\text{H}$  NMR spectrum ( $\text{CDCl}_3$ , 500 MHz) of **1b**-catalyzed transesterification between *p*-nitrophenyl acetate and 2,2,2-trifluoroethanol reaction mixture at room temperature. Signals arising from pinctine oxide catalyst are denoted with an asterisk. The percent conversion was calculated by dividing the integral of peak C by the sum of the integrals of peaks A and A'. We note that a portion of the original 10 equivalents of 2,2,2-trifluoroethanol added to the mixture evaporated during the reaction.

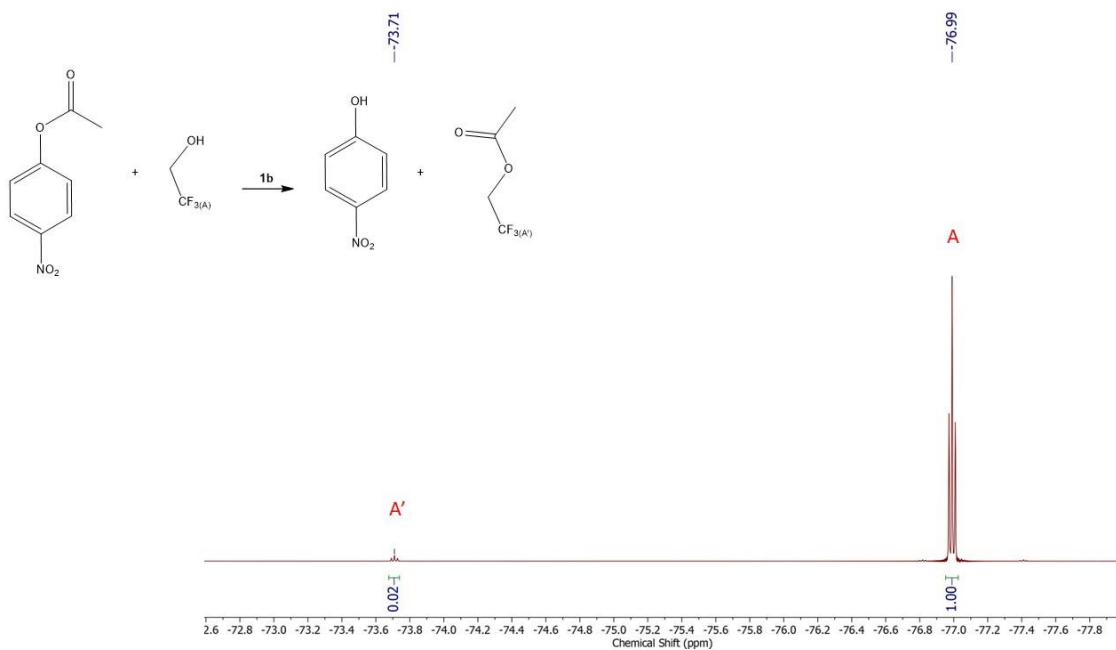

**Figure S38.**  $^{19}\text{F}$  NMR spectrum ( $\text{CDCl}_3$ , 470 MHz) of **1b**-catalyzed transesterification between *p*-nitrophenyl acetate and 2,2,2-trifluoroethanol reaction mixture at room temperature. We note that a portion of the original 10 equivalents of 2,2,2-trifluoroethanol added to the mixture evaporated during the reaction.

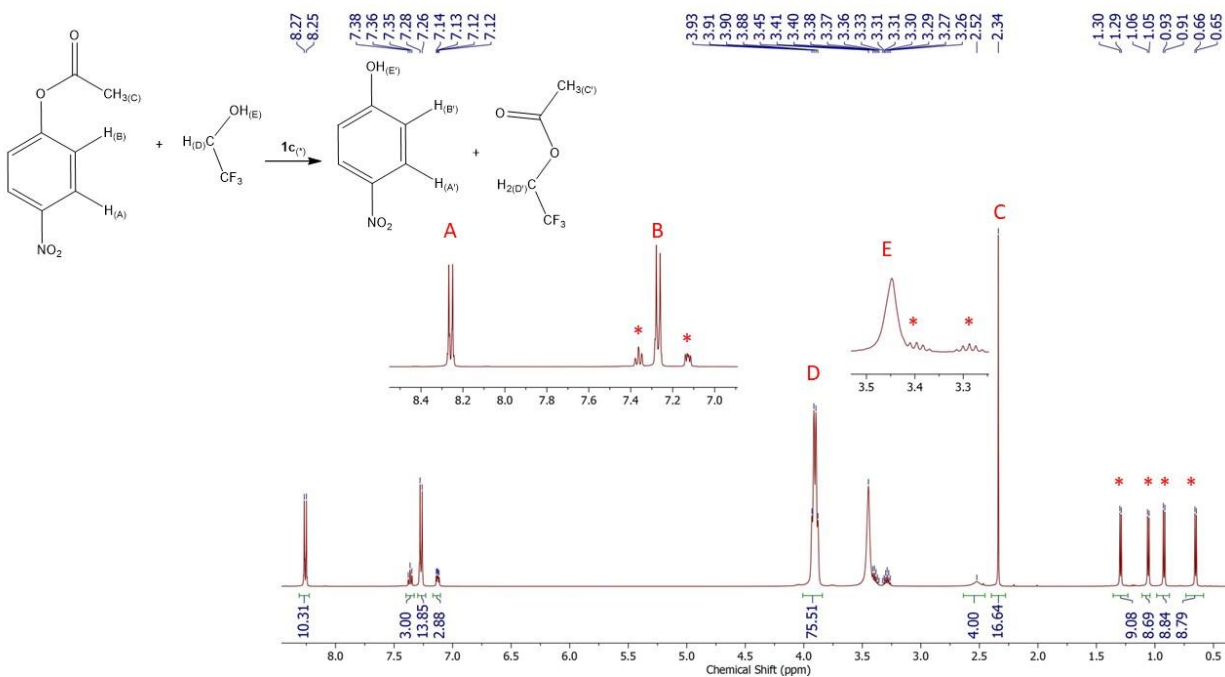

**Figure S39.** <sup>1</sup>H NMR spectrum (CDCl<sub>3</sub>, 500 MHz) of **1c**-catalyzed transesterification between *p*-nitrophenyl acetate and 2,2,2-trifluoroethanol reaction mixture at room temperature. Signals arising from pinctine oxide catalyst are denoted with an asterisk. The percent conversion was calculated by dividing the integral of peak C by the sum of the integrals of peaks A and A'. We note that a portion of the original 10 equivalents of 2,2,2-trifluoroethanol added to the mixture evaporated during the reaction.

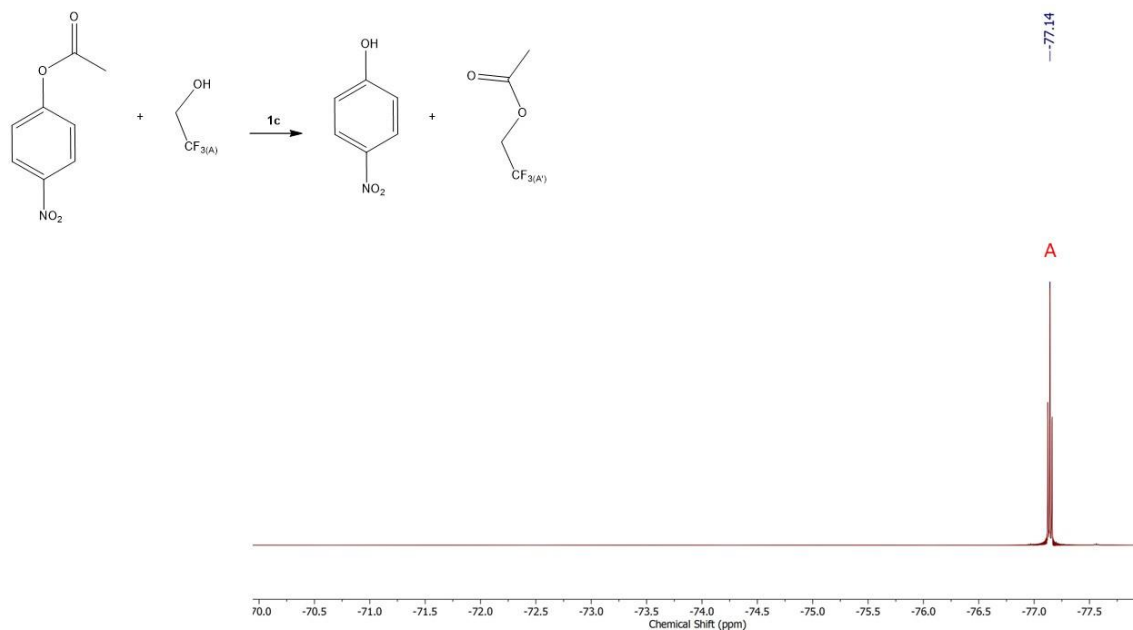

**Figure S40.**  $^{19}\text{F}$  NMR spectrum ( $\text{CDCl}_3$ , 470 MHz) of **1c**-catalyzed transesterification between *p*-nitrophenyl acetate and 2,2,2-trifluoroethanol reaction mixture at room temperature. We note that a portion of the original 10 equivalents of 2,2,2-trifluoroethanol added to the mixture evaporated during the reaction.

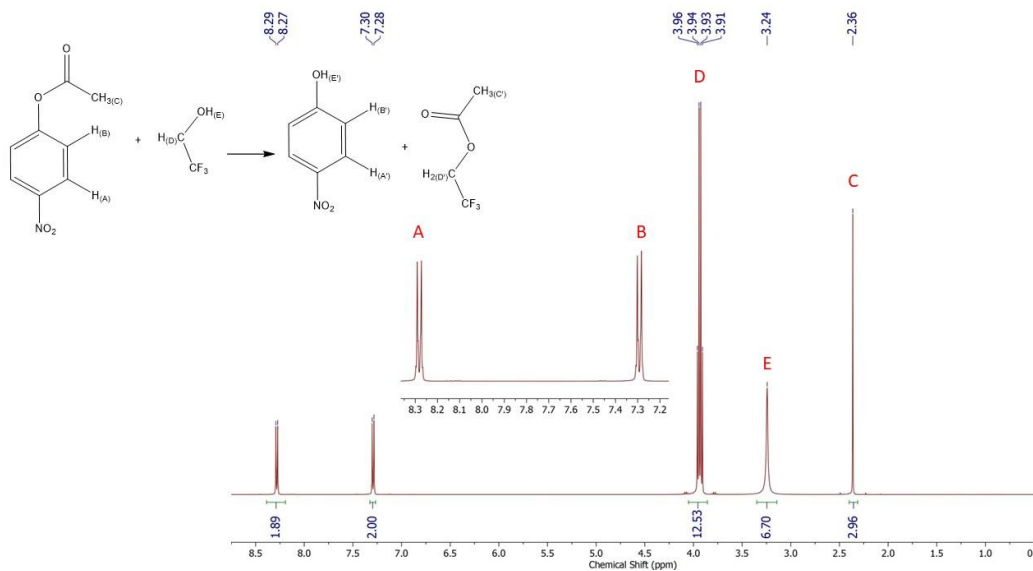

**Figure S41.**  $^1\text{H}$  NMR spectrum ( $\text{CDCl}_3$ , 500 MHz) of uncatalyzed transesterification between *p*-nitrophenyl acetate and 2,2,2-trifluoroethanol reaction mixture at room temperature. The percent conversion was calculated by dividing the integral of peak C by the sum of the integrals of peaks A and A'. We note that a portion of the original 10 equivalents of 2,2,2-trifluoroethanol added to the mixture evaporated during the reaction.

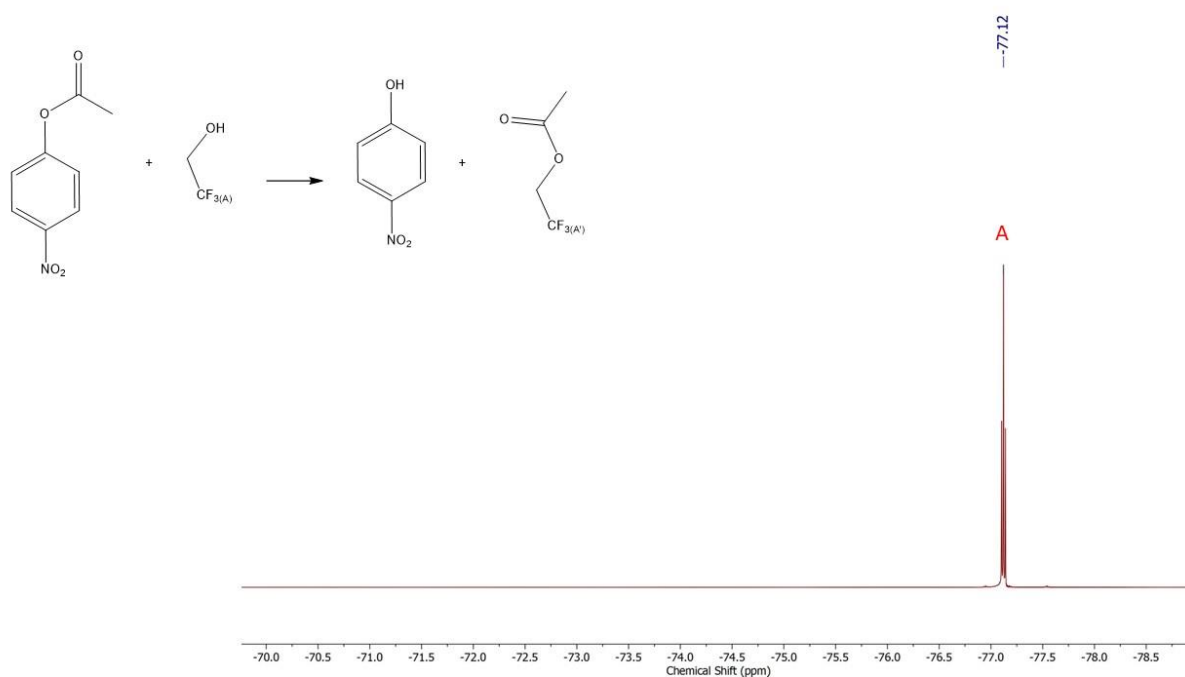

**Figure S42.** <sup>19</sup>F NMR spectrum (CDCl<sub>3</sub>, 470 MHz) of uncatalyzed transesterification between *p*-nitrophenyl acetate and 2,2,2-trifluoroethanol reaction mixture at room temperature. We note that a portion of the original 10 equivalents of 2,2,2-trifluoroethanol added to the mixture evaporated during the reaction.

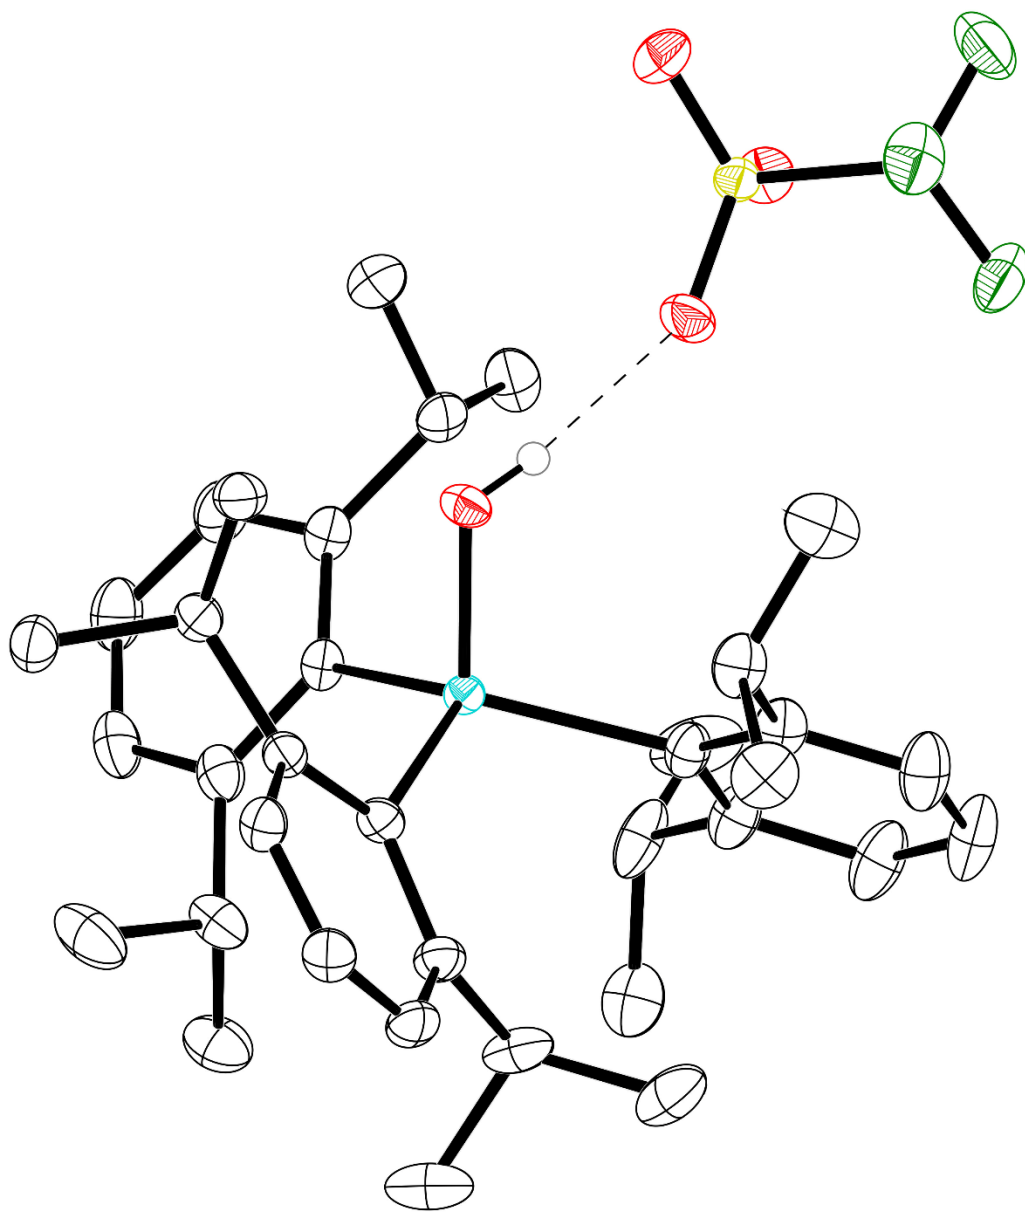

**Figure S43.** Thermal ellipsoid plot (50% probability) of **2a**. Color code: Sb teal, O red, C black, S yellow, F green, and H grey sphere of arbitrary radius. Non-protic H atoms are omitted for clarity.



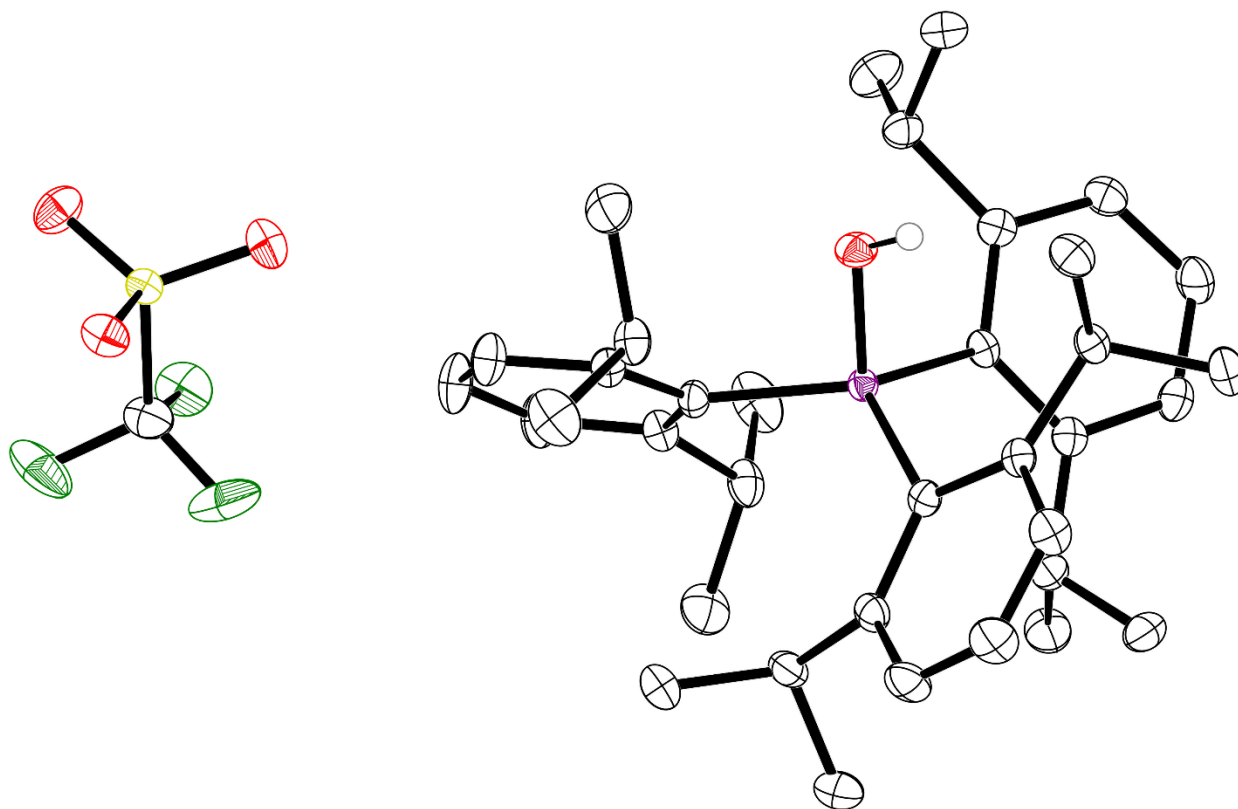

**Figure S44.** Thermal ellipsoid plot (50% probability) of **2b** triclinic. Color code: As purple, O red, C black, S yellow, F green, and H grey sphere of arbitrary radius. Non-protic H atoms are omitted for clarity.

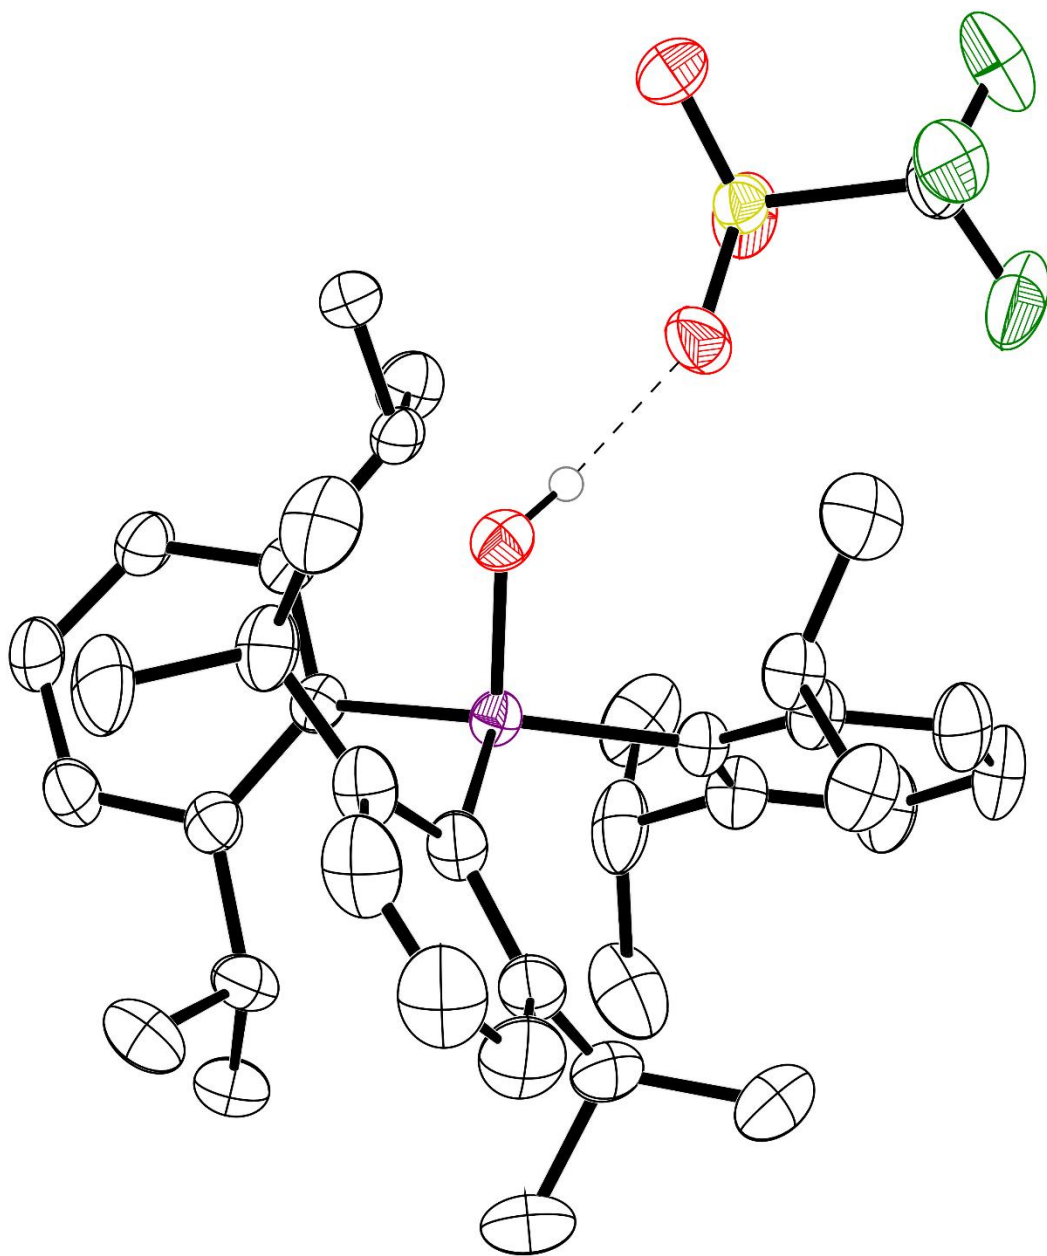

**Figure S45.** Thermal ellipsoid plot (50% probability) of **2b** monoclinic. Color code: As purple, O red, C black, S yellow, F green, and H grey sphere of arbitrary radius. Non-protic H atoms are omitted for clarity.

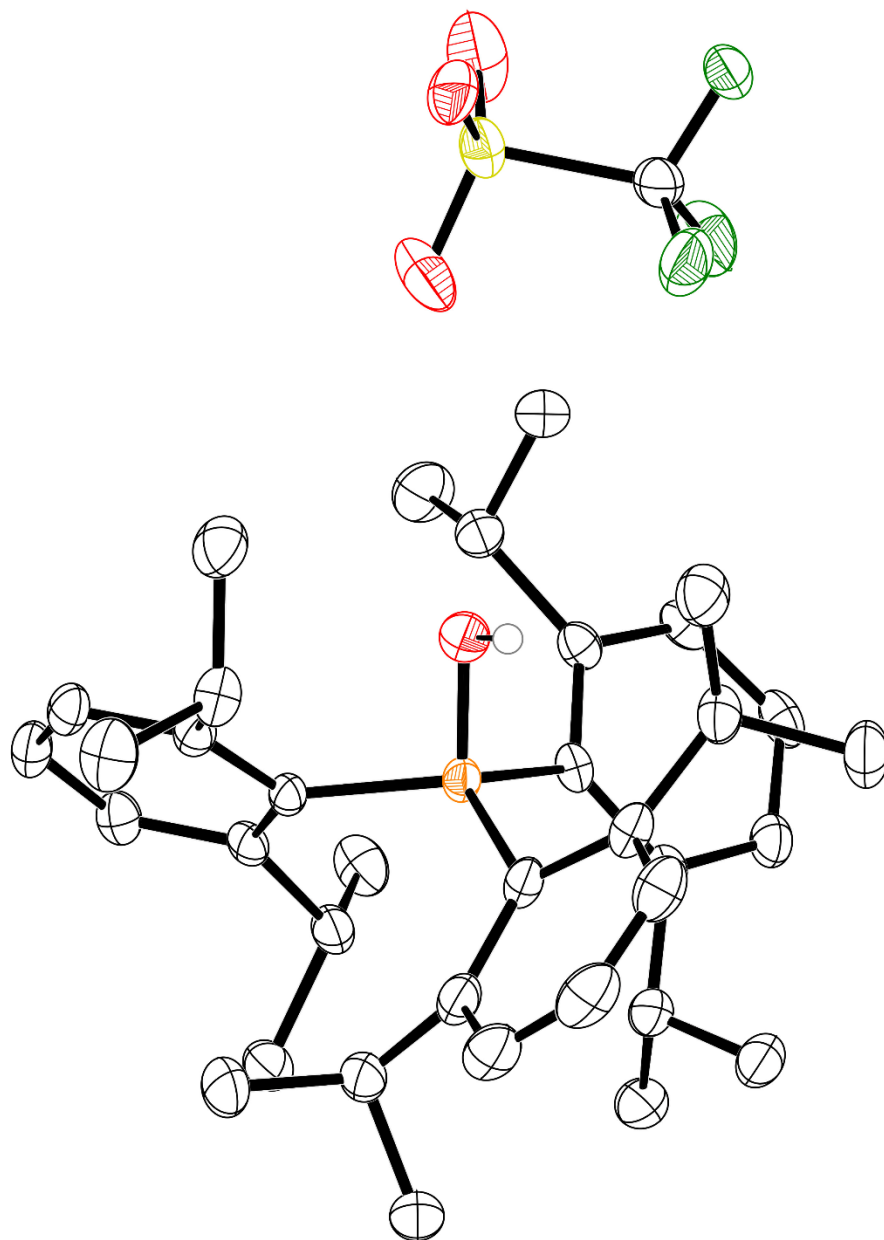

**Figure S46.** Thermal ellipsoid plot (50% probability) of one of the crystallographically independent copies of **2c** in the asymmetric unit. Color code: P orange, O red, C black, S yellow, F green, and H grey sphere of arbitrary radius. Non-protic H atoms are omitted for clarity.

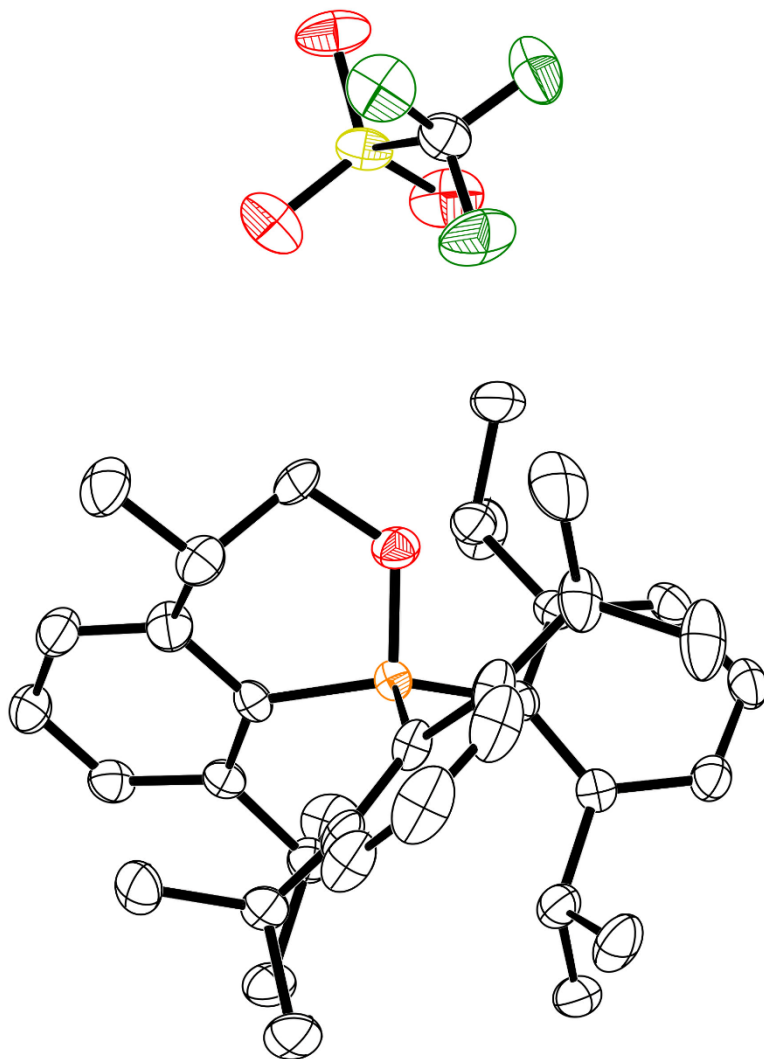

**Figure S47.** Thermal ellipsoid plot (50% probability) of **3**. Color code: P orange, O red, C black, S yellow, F green. Non-protic H atoms are omitted for clarity.

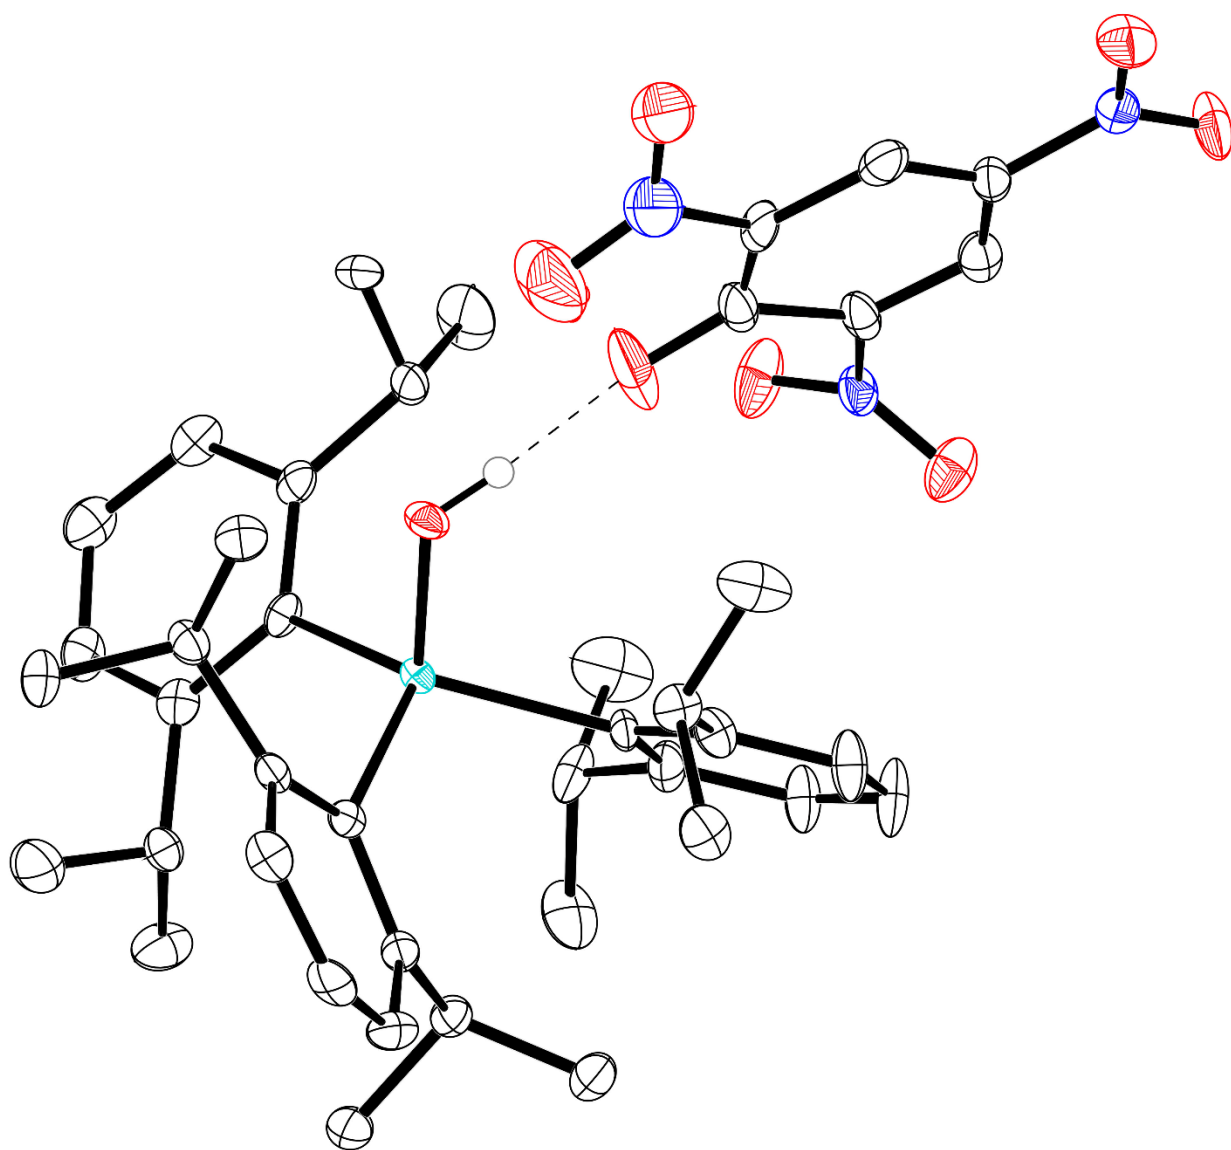

**Figure S48.** Thermal ellipsoid plot (50% probability) of **4a**. Color code: Sb teal, O red, C black, N blue, and H grey sphere of arbitrary radius. Non-protic H atoms are omitted for clarity.

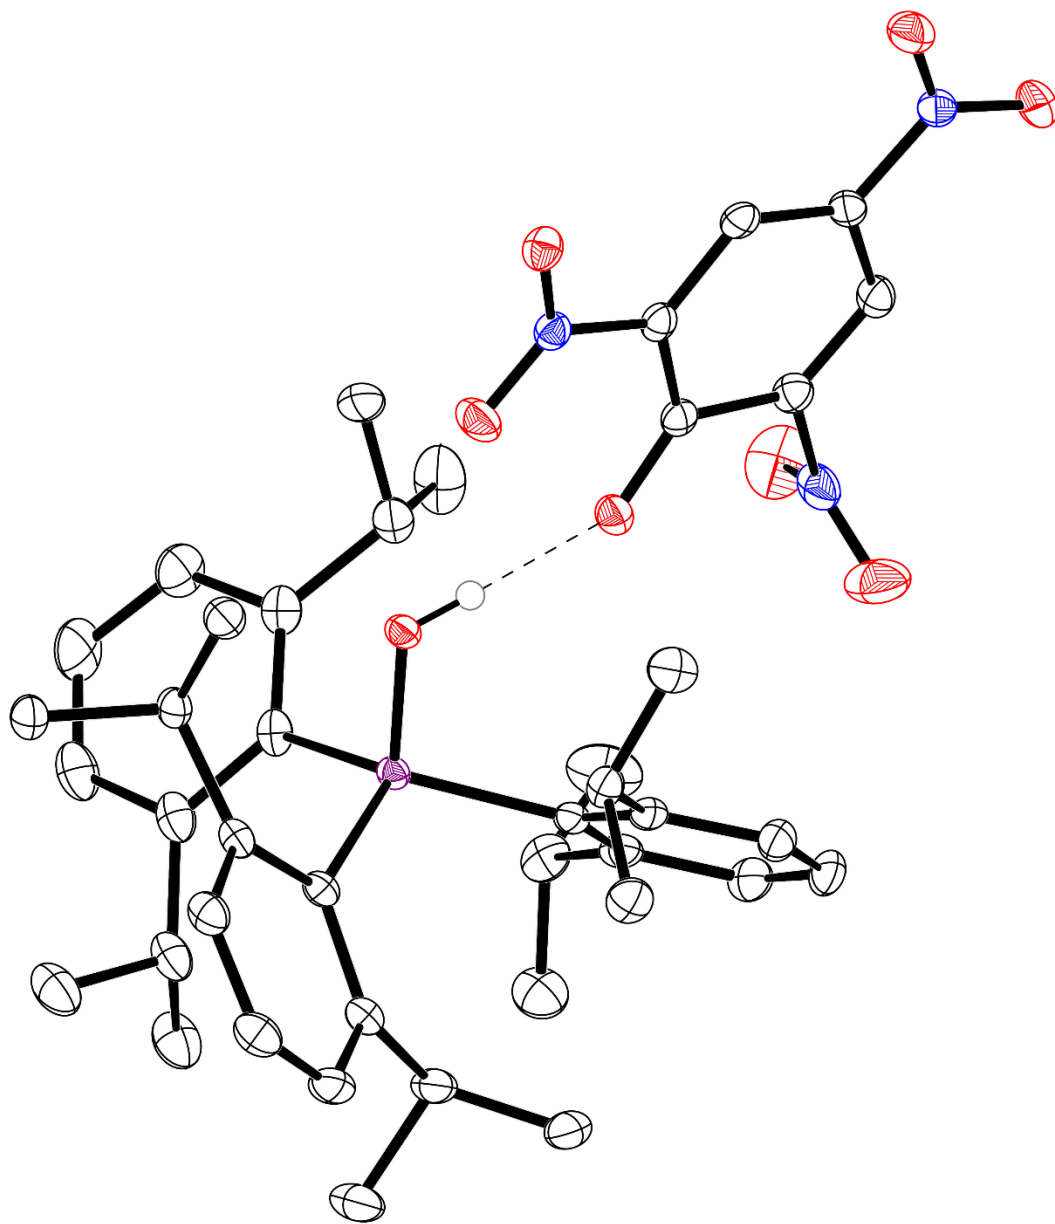

**Figure S49.** Thermal ellipsoid plot (50% probability) of one of the crystallographically independent copies of **4b** present in the asymmetric unit of crystals of  $\mathbf{4b} \cdot \frac{3}{4}(\text{C}_6\text{H}_{12})$ . Color code: As purple, O red, C black, N blue, and H grey sphere of arbitrary radius. Non-protic H atoms are omitted for clarity.

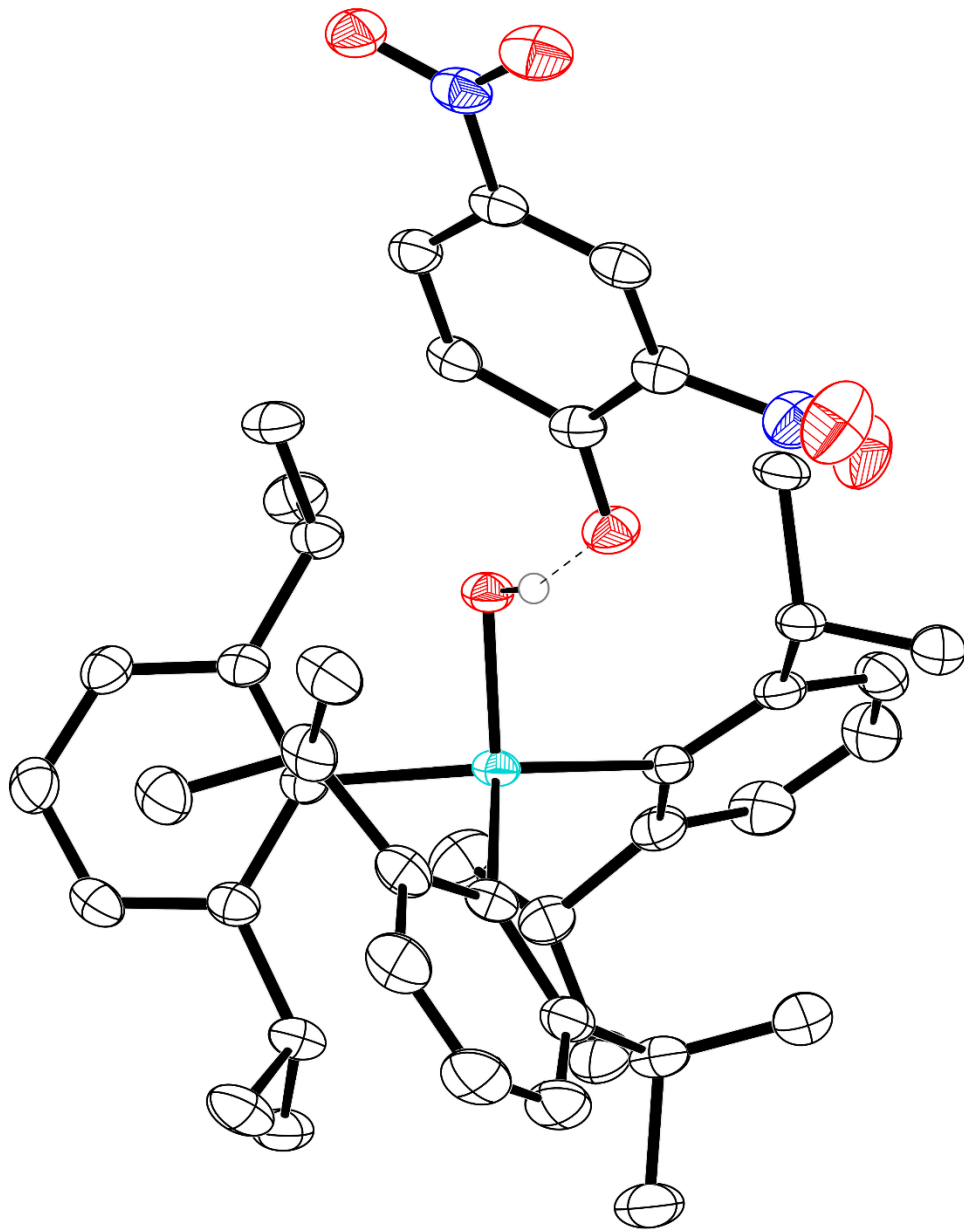

**Figure S50.** Thermal ellipsoid plot (50% probability) of **5**. Color code: Sb teal, O red, C black, N blue, and H grey sphere of arbitrary radius. Non-protic H atoms are omitted for clarity.

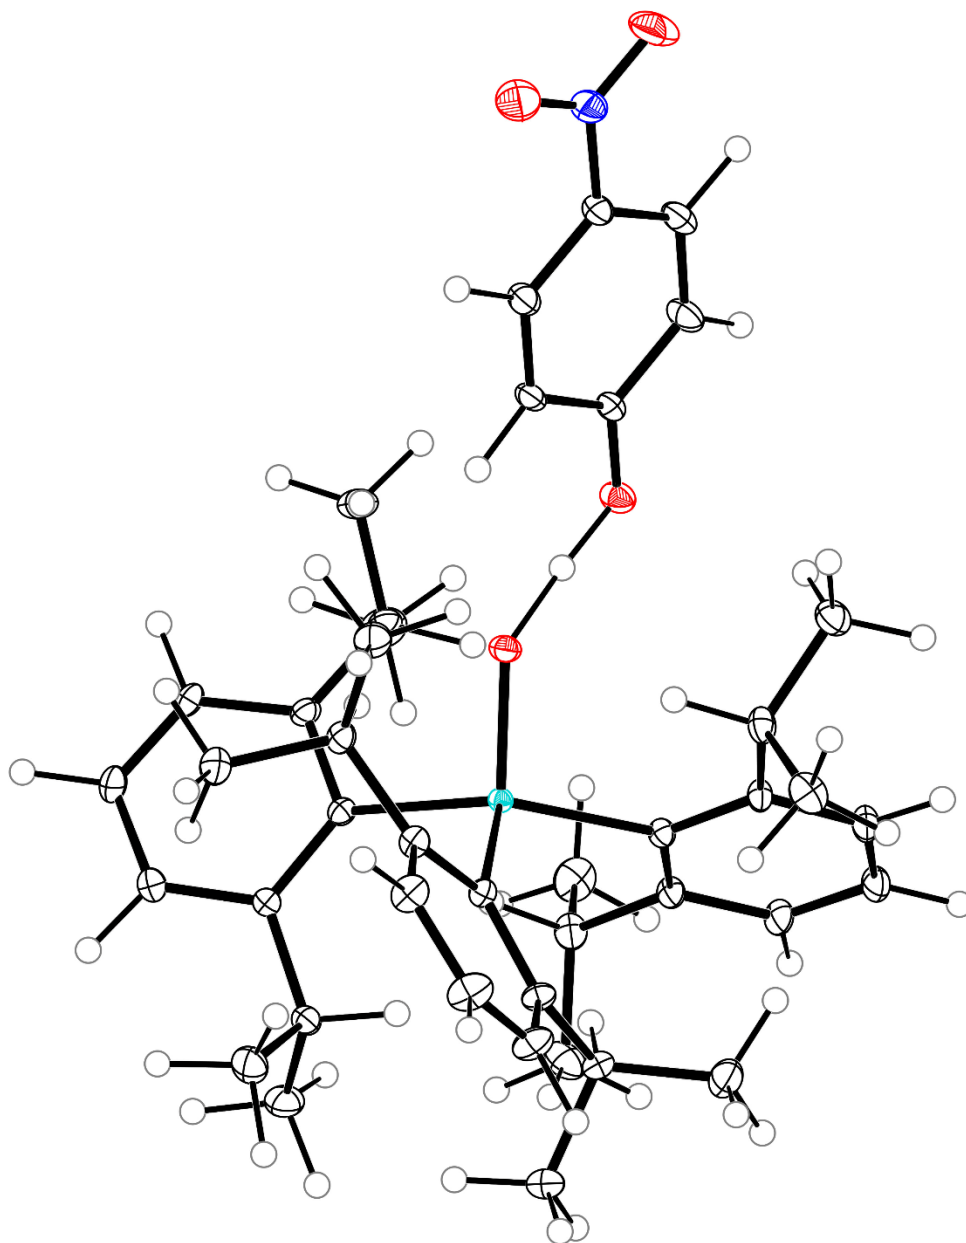

**Figure S51.** Thermal ellipsoid plot (50% probability) of **6**. Color code: Sb teal, O red, C black, N blue, and H grey spheres of arbitrary radius. Structure was obtained by Hirshfeld atom refinement.



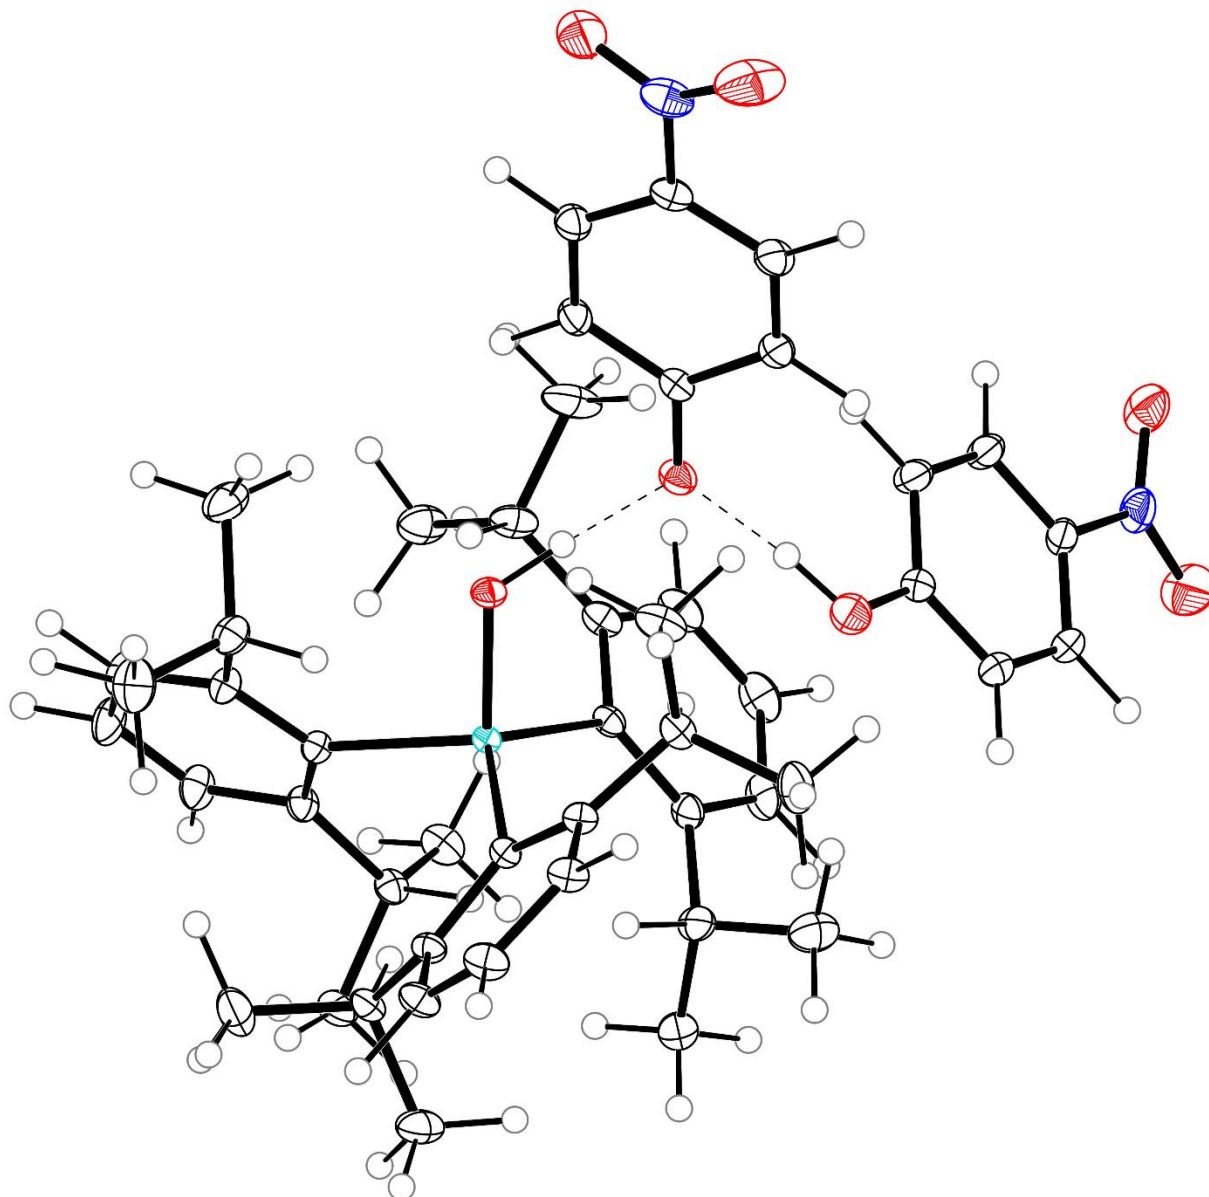

**Figure S52.** Thermal ellipsoid plot (50% probability) of 6-*p*-nitrophenol. Color code: Sb teal, O red, C black, N blue, and H grey spheres of arbitrary radius. Structure was obtained by Hirshfeld atom refinement.

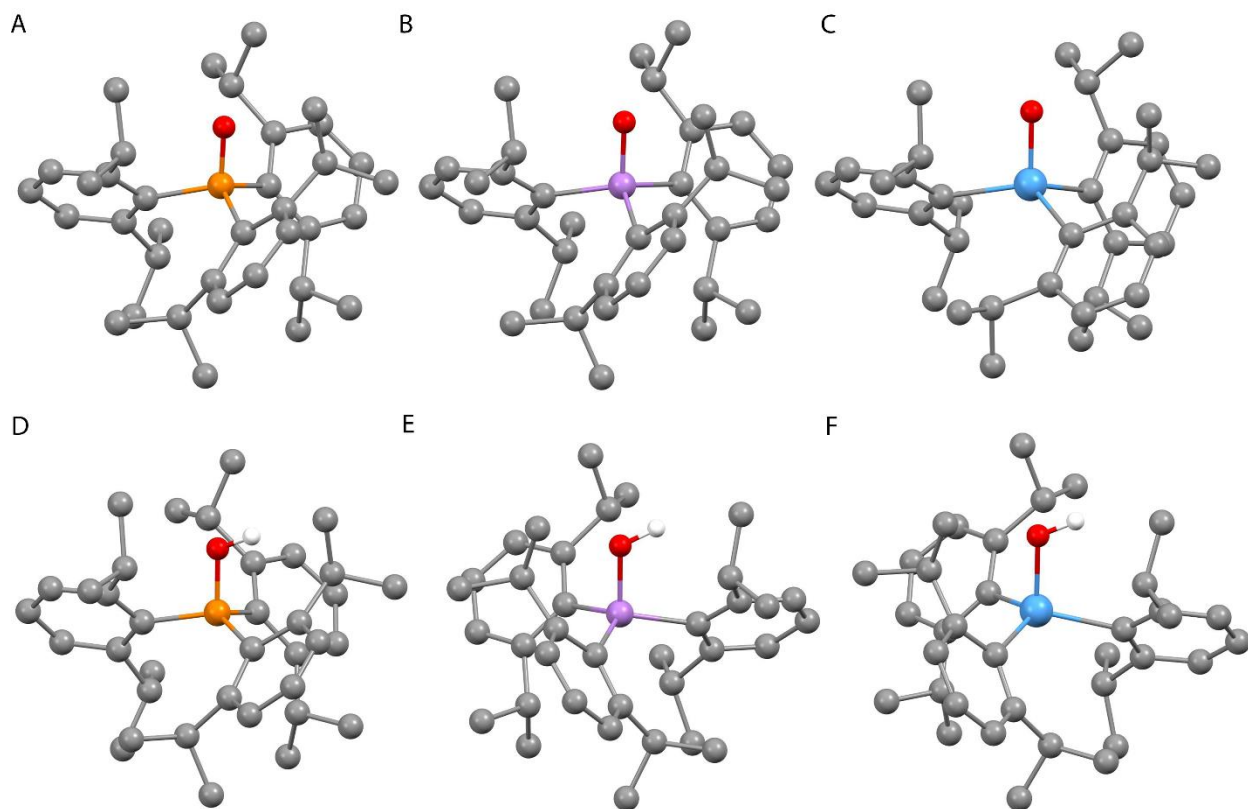

**Figure S53.** Ball-and-stick representations of atomic coordinates of molecules used in theoretical studies. Geometry optimized (PBE0/def2-TZVPP) structure of (A) **1c**, (B) **1b**, (C) **1a**, (D) **1cH<sup>+</sup>**, (E) **1bH<sup>+</sup>**, (F) **1aH<sup>+</sup>**. Color code: C grey, H white, O red, Sb teal, As violet, P orange. Non-protic H atoms are omitted for clarity.

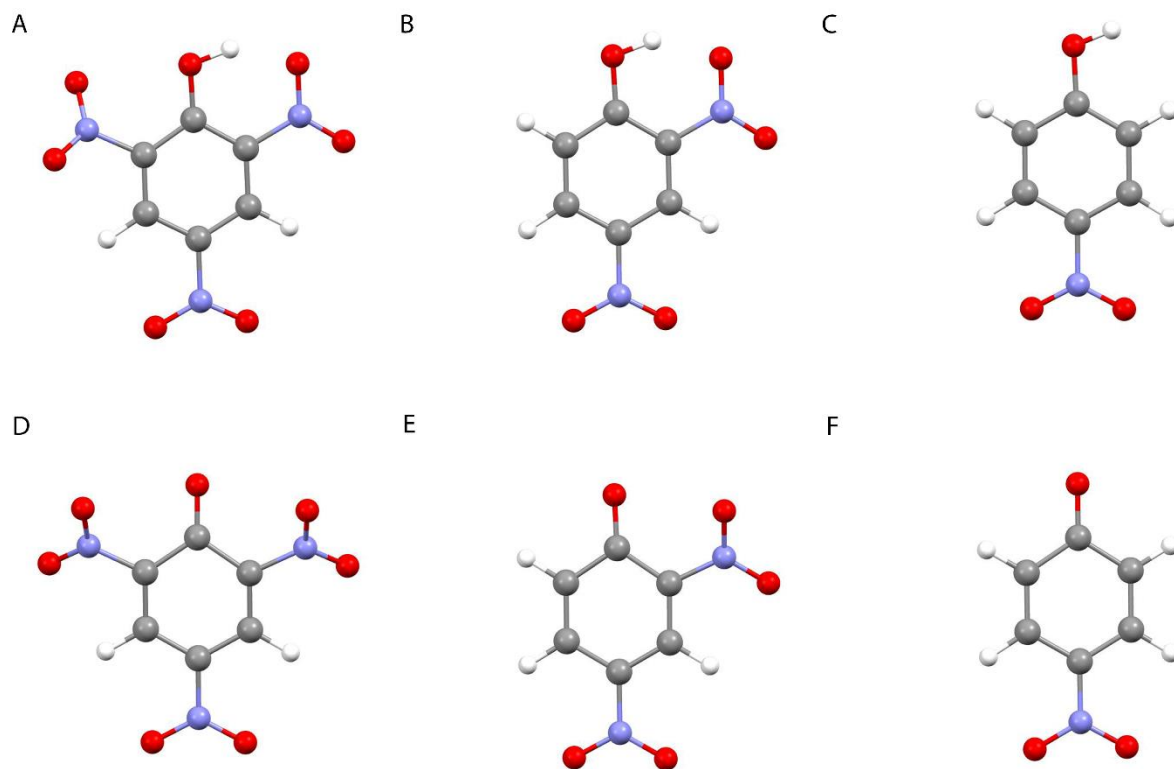

**Figure S54.** Ball-and-stick representations of atomic coordinates of molecules used in theoretical studies. Geometry optimized (PBE0/def2-TZVPP) structure of (A) 2,4,6-trinitrophenol, (B) 2,4-dinitrophenol, (C) 4-nitrophenol, (D) 2,4,6-trinitrophenoxide, (E) 2,4-dinitrophenoxide, (F) 4-nitrophenoxide. Color code: C grey, H white, O red, N blue.

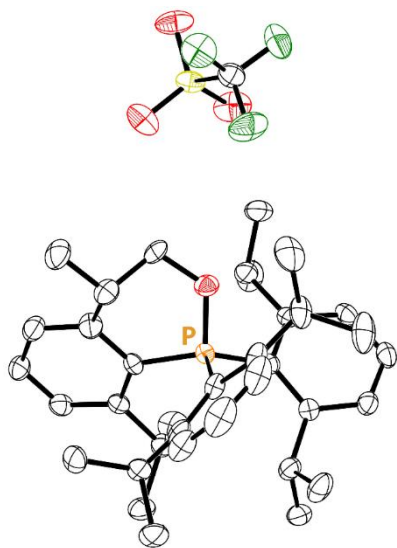

**Figure S55.** Thermal ellipsoid plot (50% probability) of **3**. Color code: P orange, O red, C black, S yellow, F green. H atoms are omitted for clarity.

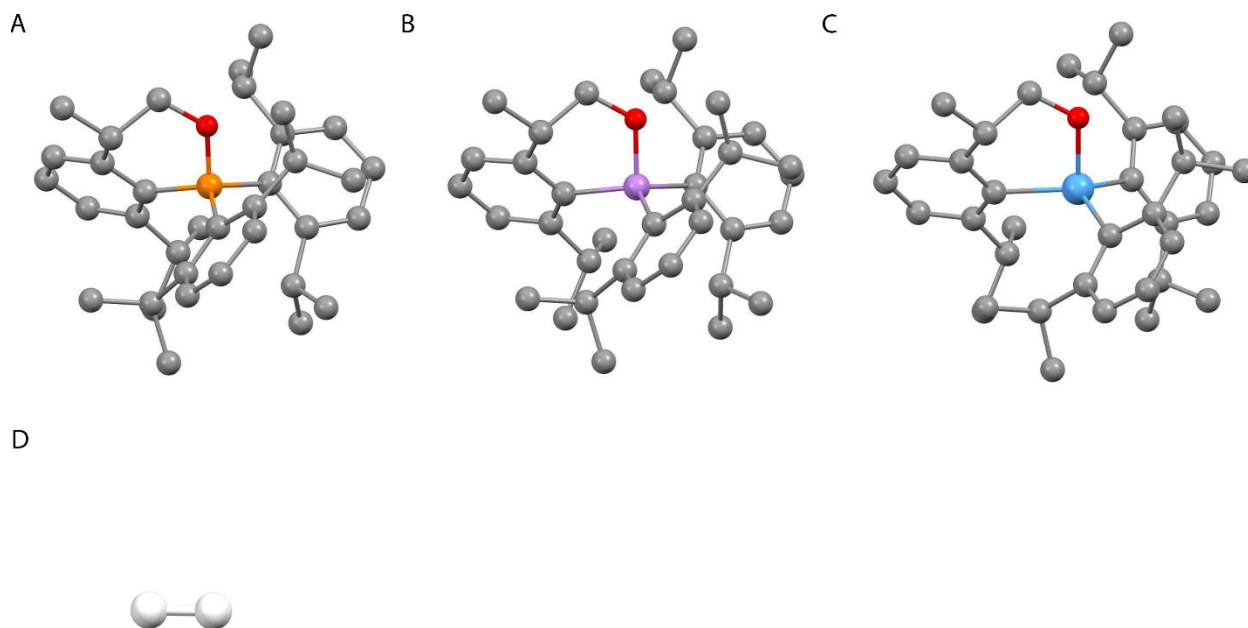

**Figure S56.** Ball-and-stick representations of atomic coordinates of molecules used in theoretical studies. Geometry optimized (PBE0/def2-TZVPP) structure of (A)  $3^+$ , (B)  $3^+(\text{As})$ , (C)  $3^+(\text{Sb})$ , and (D)  $\text{H}_2$ . Color code: C grey, H white, O red, Sb teal, As violet, P orange. H atoms are omitted for clarity from the depictions of the pnictogen compounds.

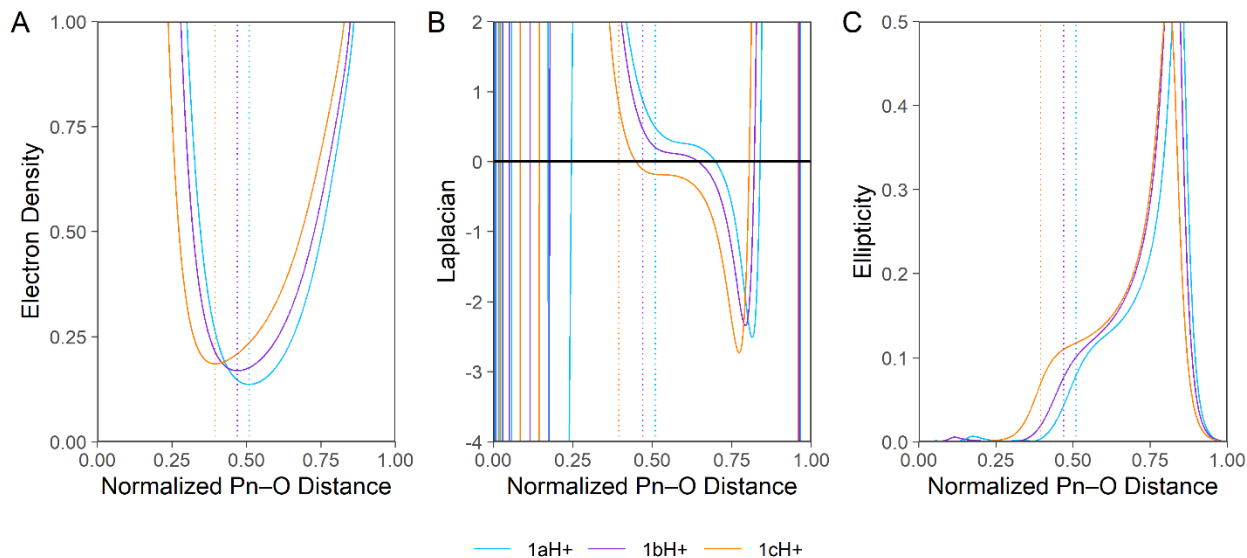

**Figure S57.** Plots of  $\rho$  ( $e^- \text{\AA}^{-3}$ ),  $\nabla^2\rho$  ( $e^- \text{\AA}^{-5}$ ), and  $\epsilon$  along the Pn-O interatomic vector in  $1\mathbf{a-cH}^+$ .

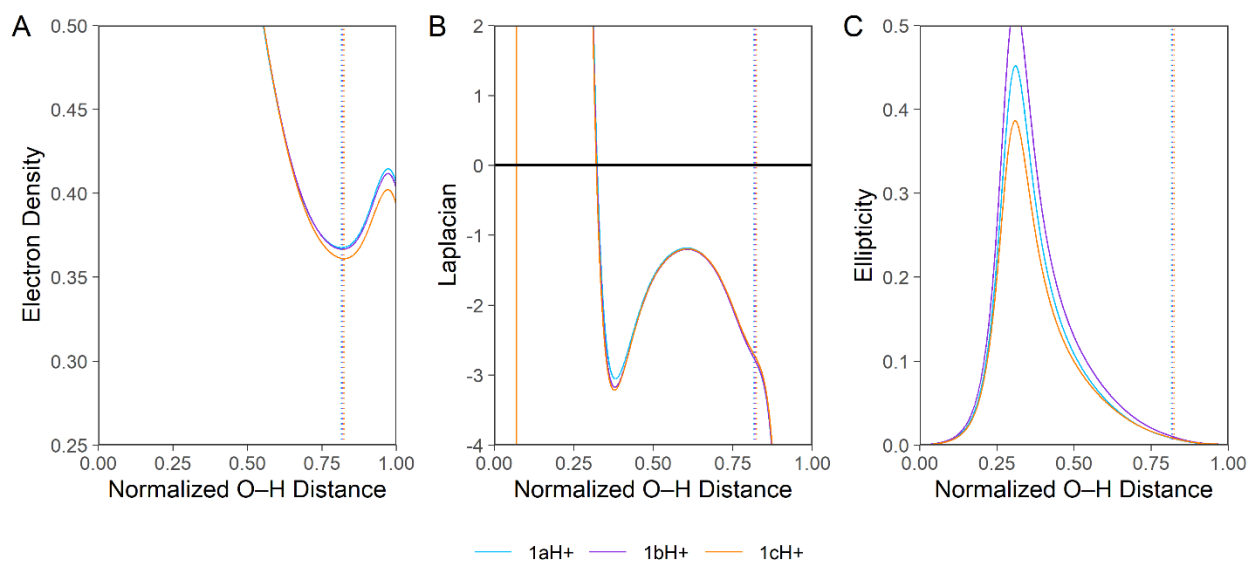

**Figure S58.** Plots of  $\rho$  ( $e^- \text{Å}^{-3}$ ),  $\nabla^2\rho$  ( $e^- \text{Å}^{-5}$ ), and  $\epsilon$  along the O-H interatomic vector in  $1a-cH^+$ .

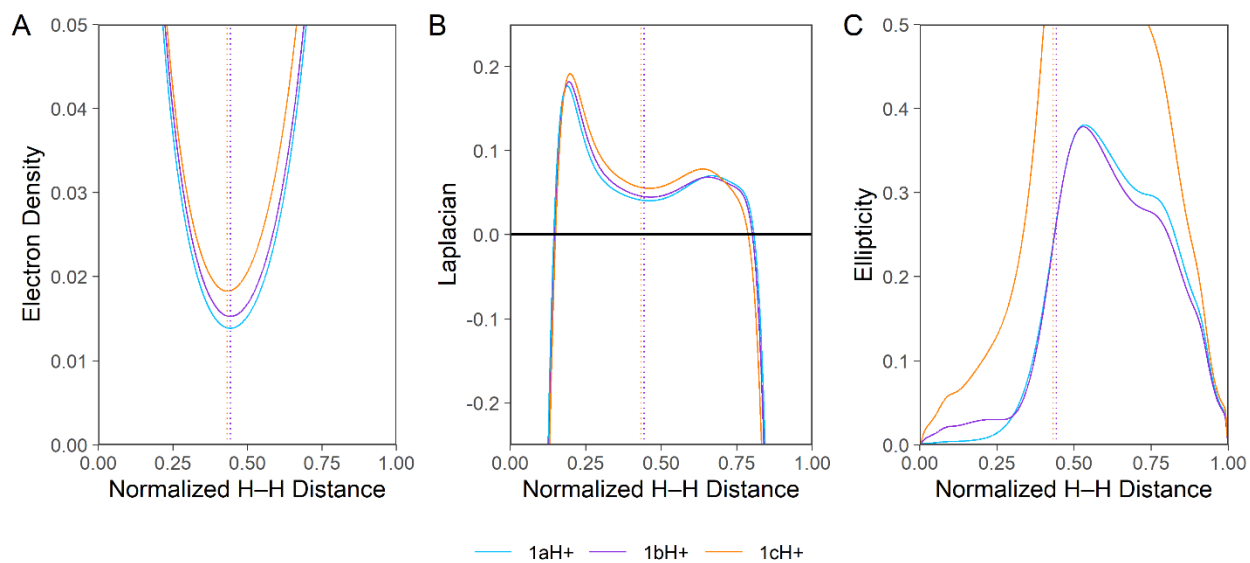

**Figure S59.** Plots of  $\rho$  ( $e^- \text{Å}^{-3}$ ),  $\nabla^2\rho$  ( $e^- \text{Å}^{-5}$ ), and  $\epsilon$  along the OH...HC<sub>methyl</sub> interatomic vector for the primary dihydrogen bonding interaction in  $1a-cH^+$ .

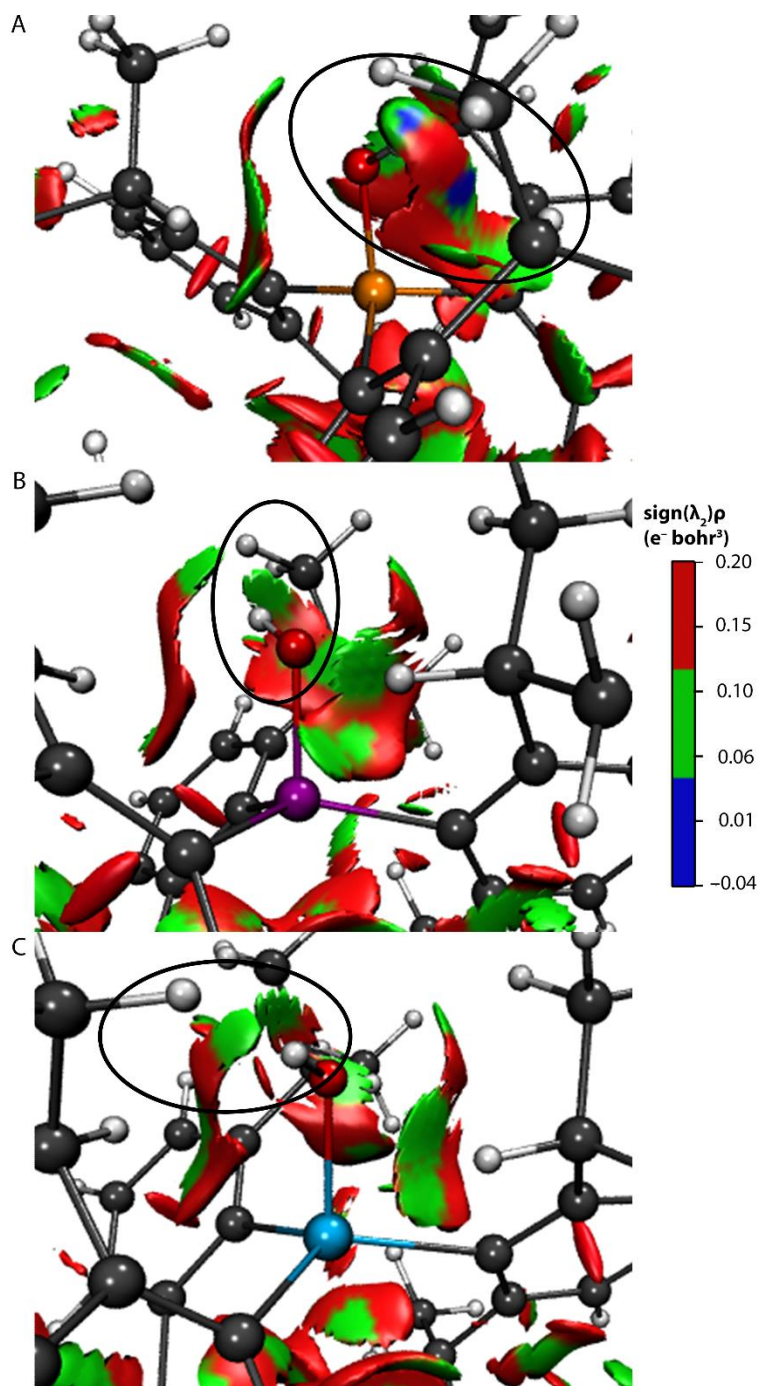

**Figure S60.** NCI analysis of **1cH<sup>+</sup>** (*top*), **1bH<sup>+</sup>** (*middle*), and **1aH<sup>+</sup>** (*bottom*) depicting reduced gradient surfaces (isovalue = 0.45 a.u.) with the function  $\text{sign}(\lambda_2)\rho$  where  $\lambda_2$  is the second-largest eigenvalue of the Laplacian color-mapped on the surface. Blue is indicative of H-bonding interactions, green is indicative of van der Waals interactions, and red is indicative of steric repulsions. Color code: C black, H grey, O red, Sb teal, As violet, P orange.

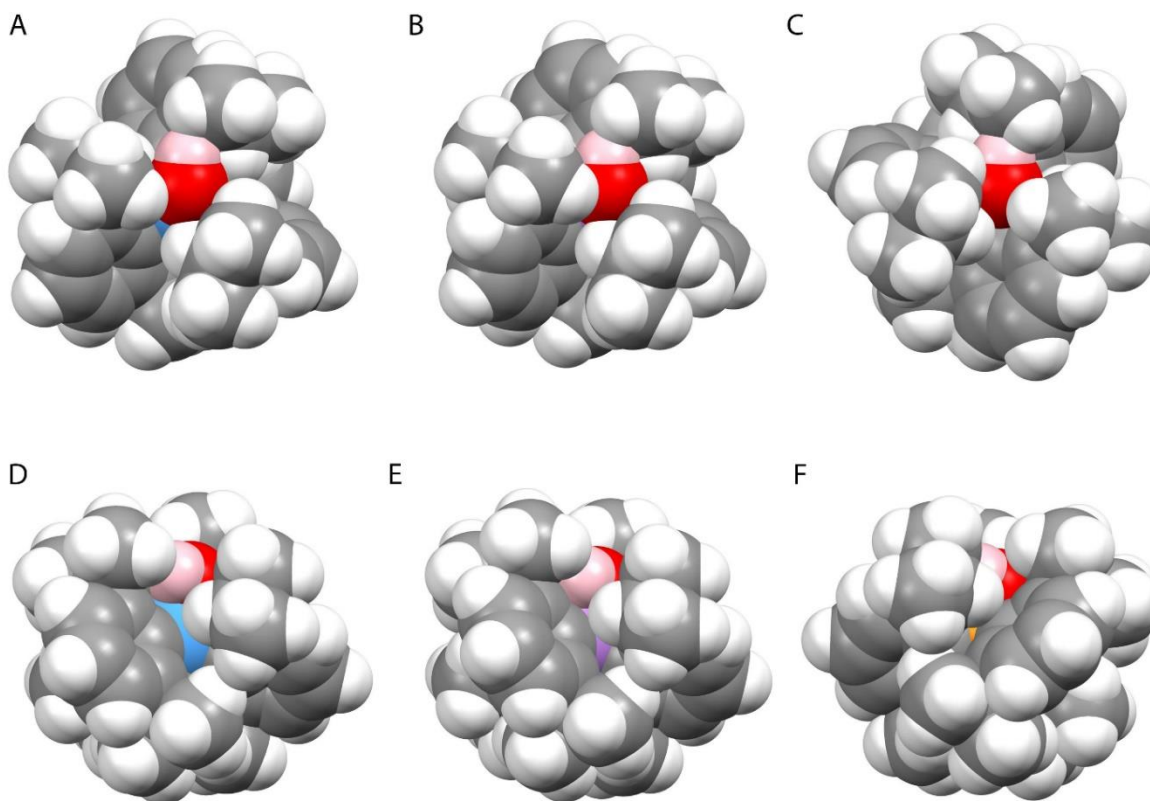

**Figure S61.** Space-filling diagrams of optimized geometries (PBE0/def2-TZVPP) of **1aH<sup>+</sup>** (A, D), **1bH<sup>+</sup>** (B, E) and **1cH<sup>+</sup>** (C, F) viewed along Pn–O bond axis (A-C) and perpendicular to Pn–O bond axis (D-F) (Pn = Sb, As, P). Color code: Sb teal, As purple, P orange, C grey, H white, protic H atom pink.

**Table S1.** Calculated reaction enthalpies and Gibbs free energies of elimination of H<sub>2</sub> from hydroxypnictonium cations **1a-cH<sup>+</sup>** to form cyclized alkoxy-pnictonium cations **3<sup>+</sup>**(Sb), **3<sup>+</sup>**(As), and **3<sup>+</sup>**, respectively.

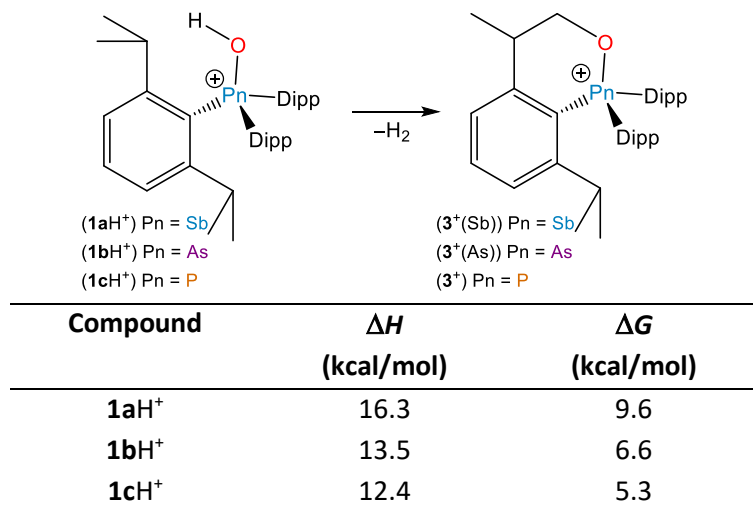

**Table S2.** Crystallographic details for **2a**, **2b**·CHCl<sub>3</sub> triclinic, **2b**·CHCl<sub>3</sub> monoclinic, and **2c**.

| Compound                                          | <b>2a</b>                                                         | <b>2b</b> ·CHCl <sub>3</sub> triclinic                                            | <b>2b</b> ·CHCl <sub>3</sub> monoclinic                                           | <b>2c</b>                                                        |
|---------------------------------------------------|-------------------------------------------------------------------|-----------------------------------------------------------------------------------|-----------------------------------------------------------------------------------|------------------------------------------------------------------|
| Empirical formula                                 | C <sub>37</sub> H <sub>52</sub> F <sub>3</sub> O <sub>4</sub> SSb | C <sub>38</sub> H <sub>53</sub> F <sub>3</sub> Cl <sub>3</sub> O <sub>4</sub> SAs | C <sub>38</sub> H <sub>53</sub> F <sub>3</sub> Cl <sub>3</sub> O <sub>4</sub> SAs | C <sub>37</sub> H <sub>52</sub> F <sub>3</sub> O <sub>4</sub> SP |
| Formula Weight                                    | 771.59                                                            | 844.13                                                                            | 844.13                                                                            | 680.81                                                           |
| Temperature (K)                                   | 100.0(1)                                                          | 100.0(1)                                                                          | 100.0(1)                                                                          | 100.0(1)                                                         |
| Wavelength (Å)                                    | 1.54184                                                           | 1.54184                                                                           | 1.54184                                                                           | 1.54184                                                          |
| Crystal system                                    | Triclinic                                                         | Triclinic                                                                         | Monoclinic                                                                        | Triclinic                                                        |
| Space group                                       | <i>P</i> $\bar{1}$                                                | <i>P</i> $\bar{1}$                                                                | <i>P</i> 2 <sub>1</sub> / <i>n</i>                                                | <i>P</i> $\bar{1}$                                               |
| <i>a</i> (Å)                                      | 10.19520(10)                                                      | 10.1956(2)                                                                        | 10.06410(10)                                                                      | 14.3959(2)                                                       |
| <i>b</i> (Å)                                      | 12.58260(10)                                                      | 14.2779(2)                                                                        | 17.7940(3)                                                                        | 16.0784(2)                                                       |
| <i>c</i> (Å)                                      | 14.95020(10)                                                      | 14.7095(2)                                                                        | 23.5660(3)                                                                        | 16.8118(2)                                                       |
| $\alpha$ (°)                                      | 90.2560(10)                                                       | 92.4510(10)                                                                       |                                                                                   | 106.2340(10)                                                     |
| $\beta$ (°)                                       | 98.4430(10)                                                       | 101.6540(10)                                                                      | 98.6020(10)                                                                       | 99.4490(10)                                                      |
| $\gamma$ (°)                                      | 105.1700(10)                                                      | 100.5970(10)                                                                      |                                                                                   | 97.5890(10)                                                      |
| Volume (Å <sup>3</sup> )                          | 1829.10(3)                                                        | 2054.26(6)                                                                        | 4172.74(10)                                                                       | 3619.84(8)                                                       |
| <i>Z</i>                                          | 2                                                                 | 2                                                                                 | 4                                                                                 | 4                                                                |
| $\rho_{\text{calc}}$ (Mg/m <sup>3</sup> )         | 1.401                                                             | 1.365                                                                             | 1.344                                                                             | 1.249                                                            |
| Crystal size (mm <sup>3</sup> )                   | 0.09 × 0.08 × 0.06                                                | 0.23 × 0.15 × 0.13                                                                | 0.23 × 0.06 × 0.05                                                                | 0.21 × 0.12 × 0.07                                               |
| $\theta$ range (°)                                | 2.991 to 67.073                                                   | 3.078 to 67.078                                                                   | 3.125 to 67.074                                                                   | 2.801 to 67.078                                                  |
| Total reflections                                 | 52573                                                             | 25894                                                                             | 35950                                                                             | 49143                                                            |
| Unique reflections                                | 6525                                                              | 7326                                                                              | 7436                                                                              | 12911                                                            |
| Method                                            | IAM                                                               | IAM                                                                               | IAM                                                                               | IAM                                                              |
| Parameters                                        | 431                                                               | 467                                                                               | 504                                                                               | 928                                                              |
| Completeness                                      | 100                                                               | 100                                                                               | 100                                                                               | 99.9                                                             |
| <i>R</i> <sub>int</sub>                           | 0.0480                                                            | 0.0335                                                                            | 0.0394                                                                            | 0.0339                                                           |
| <i>R</i> <sub>1</sub> ( <i>I</i> > 2 $\sigma$ )   | 0.0198                                                            | 0.0362                                                                            | 0.0535                                                                            | 0.0435                                                           |
| <i>R</i> <sub>1</sub> (all data)                  | 0.0209                                                            | 0.0383                                                                            | 0.0573                                                                            | 0.0486                                                           |
| w <i>R</i> <sub>2</sub> ( <i>I</i> > 2 $\sigma$ ) | 0.0489                                                            | 0.0942                                                                            | 0.1154                                                                            | 0.1207                                                           |
| w <i>R</i> <sub>2</sub> (all data)                | 0.0494                                                            | 0.0957                                                                            | 0.1170                                                                            | 0.1247                                                           |
| Goodness of fit, <i>S</i>                         | 1.031                                                             | 1.056                                                                             | 1.164                                                                             | 1.037                                                            |



**Table S3.** Crystallographic details for **3**, **4a**, **4b**· $\frac{3}{4}$ (C<sub>6</sub>H<sub>12</sub>), and **5**·(CHCl<sub>3</sub>)<sub>2</sub>.

| Compound                                          | <b>3</b>                                                         | <b>4a</b> <sup>†</sup>                                           | <b>4b</b> · $\frac{3}{4}$ (C <sub>6</sub> H <sub>12</sub> )       | <b>5</b> ·(CHCl <sub>3</sub> ) <sub>2</sub>                                      |
|---------------------------------------------------|------------------------------------------------------------------|------------------------------------------------------------------|-------------------------------------------------------------------|----------------------------------------------------------------------------------|
| Empirical formula                                 | C <sub>37</sub> H <sub>50</sub> F <sub>3</sub> O <sub>4</sub> SP | C <sub>42</sub> H <sub>54</sub> N <sub>3</sub> O <sub>8</sub> Sb | C <sub>46.5</sub> H <sub>63</sub> AsN <sub>3</sub> O <sub>8</sub> | C <sub>44</sub> H <sub>57</sub> Cl <sub>6</sub> N <sub>2</sub> O <sub>6</sub> Sb |
| Formula Weight                                    | 678.80                                                           | 850.63                                                           | 866.92                                                            | 1044.36                                                                          |
| Temperature (K)                                   | 100.0(1)                                                         | 100.0(1)                                                         | 100.0(1)                                                          | 100.0(1)                                                                         |
| Wavelength (Å)                                    | 1.54184                                                          | 0.71073                                                          | 1.54184                                                           | 1.54184                                                                          |
| Crystal system                                    | Monoclinic                                                       | Monoclinic                                                       | Triclinic                                                         | Triclinic                                                                        |
| Space group                                       | <i>P</i> 2 <sub>1</sub> / <i>n</i>                               | <i>Pn</i>                                                        | <i>P</i> $\bar{1}$                                                | <i>P</i> $\bar{1}$                                                               |
| <i>a</i> (Å)                                      | 9.49870(10)                                                      | 10.4423(2)                                                       | 11.82030(10)                                                      | 11.1814(2)                                                                       |
| <i>b</i> (Å)                                      | 25.1021(3)                                                       | 20.8325(5)                                                       | 15.2864(2)                                                        | 14.1312(3)                                                                       |
| <i>c</i> (Å)                                      | 14.9869(2)                                                       | 18.7820(4)                                                       | 24.9112(2)                                                        | 16.4708(4)                                                                       |
| $\alpha$ (°)                                      |                                                                  |                                                                  | 87.8670(10)                                                       | 79.673(2)                                                                        |
| $\beta$ (°)                                       | 101.4440(10)                                                     | 93.444(2)                                                        | 80.2660(10)                                                       | 74.232(2)                                                                        |
| $\gamma$ (°)                                      |                                                                  |                                                                  | 88.6100(10)                                                       | 76.038(2)                                                                        |
| Volume (Å <sup>3</sup> )                          | 3502.39(7)                                                       | 4078.44(15)                                                      | 4432.59(8)                                                        | 2412.49(10)                                                                      |
| <i>Z</i>                                          | 4                                                                | 4                                                                | 4                                                                 | 2                                                                                |
| $\rho_{\text{calc}}$ (Mg/m <sup>3</sup> )         | 1.287                                                            | 1.385                                                            | 1.299                                                             | 1.438                                                                            |
| Crystal size (mm <sup>3</sup> )                   | 0.11 × 0.08 × 0.06                                               | 0.27 × 0.21 × 0.14                                               | 0.19 × 0.13 × 0.08                                                | 0.19 × 0.08 × 0.05                                                               |
| $\theta$ range (°)                                | 3.486 to 67.077                                                  | 2.185 to 25.123                                                  | 2.893 to 67.077                                                   | 2.809 to 67.080                                                                  |
| Total reflections                                 | 48293                                                            | 32156                                                            | 60318                                                             | 30917                                                                            |
| Unique reflections                                | 6253                                                             | 12674                                                            | 15821                                                             | 8624                                                                             |
| Method                                            | IAM                                                              | IAM                                                              | IAM                                                               | IAM                                                                              |
| Parameters                                        | 455                                                              | 1087                                                             | 1086                                                              | 621                                                                              |
| Completeness                                      | 100                                                              | 99.9                                                             | 100.0                                                             | 100.0                                                                            |
| <i>R</i> <sub>int</sub>                           | 0.0372                                                           | 0.0338                                                           | 0.0359                                                            | 0.0457                                                                           |
| <i>R</i> <sub>1</sub> ( <i>I</i> > 2 $\sigma$ )   | 0.0491                                                           | 0.0310                                                           | 0.0311                                                            | 0.0346                                                                           |
| <i>R</i> <sub>1</sub> (all data)                  | 0.0524                                                           | 0.0344                                                           | 0.0345                                                            | 0.0367                                                                           |
| w <i>R</i> <sub>2</sub> ( <i>I</i> > 2 $\sigma$ ) | 0.1282                                                           | 0.0693                                                           | 0.0779                                                            | 0.0908                                                                           |
| w <i>R</i> <sub>2</sub> (all data)                | 0.1307                                                           | 0.0709                                                           | 0.0799                                                            | 0.0925                                                                           |
| Goodness of fit, <i>S</i>                         | 1.039                                                            | 1.079                                                            | 1.048                                                             | 1.048                                                                            |

<sup>†</sup> Flack *x* parameter: -0.008(8)

**Table S4.** Crystallographic parameters for **6**-*p*-nitrophenol and **6**.

| Compound                                  | <b>6</b> - <i>p</i> -nitrophenol                                 |        | <b>6</b>                                           |        |
|-------------------------------------------|------------------------------------------------------------------|--------|----------------------------------------------------|--------|
| Empirical formula                         | C <sub>48</sub> H <sub>61</sub> N <sub>2</sub> O <sub>7</sub> Sb |        | C <sub>42</sub> H <sub>56</sub> NO <sub>4</sub> Sb |        |
| Formula Weight                            | 899.788                                                          |        | 760.677                                            |        |
| Temperature (K)                           | 100.0(1)                                                         |        | 99.95(17)                                          |        |
| Wavelength (Å)                            | 0.71073                                                          |        | 0.71073                                            |        |
| Crystal system                            | Monoclinic                                                       |        | Triclinic                                          |        |
| Space group                               | <i>P</i> 2 <sub>1</sub> / <i>n</i>                               |        | <i>P</i> $\bar{1}$                                 |        |
| <i>a</i> (Å)                              | 15.7304(3)                                                       |        | 9.8747(2)                                          |        |
| <i>b</i> (Å)                              | 18.4840(3)                                                       |        | 12.6935(3)                                         |        |
| <i>c</i> (Å)                              | 15.7610(3)                                                       |        | 15.4719(3)                                         |        |
| $\alpha$ (°)                              |                                                                  |        | 87.478(2)                                          |        |
| $\beta$ (°)                               | 101.383(2)                                                       |        | 77.760(2)                                          |        |
| $\gamma$ (°)                              |                                                                  |        | 83.096(2)                                          |        |
| Volume (Å <sup>3</sup> )                  | 4492.54(14)                                                      |        | 1881.15(7)                                         |        |
| <i>Z</i>                                  | 4                                                                |        | 2                                                  |        |
| $\rho_{\text{calc}}$ (Mg/m <sup>3</sup> ) | 1.330                                                            |        | 1.343                                              |        |
| Crystal size (mm <sup>3</sup> )           | 0.21 × 0.14 × 0.1                                                |        | 0.22 × 0.08 × 0.06                                 |        |
| $\theta$ range (°)                        | 2.32 to 33.73                                                    |        | 2.08 to 33.73                                      |        |
| Total reflections                         | 69536                                                            |        | 62483                                              |        |
| Unique reflections                        | 17515                                                            |        | 15034                                              |        |
| Method                                    | IAM                                                              | HAR    | IAM                                                | HAR    |
| Parameters                                | 541                                                              | 706    | 448                                                | 601    |
| Completeness                              | 97.8                                                             | 97.79  | 100.0                                              | 99.96  |
| R <sub>int</sub>                          | 0.0388                                                           | 0.0412 | 0.0487                                             | 0.0515 |
| R <sub>1</sub> ( <i>I</i> > 2 $\sigma$ )  | 0.0296                                                           | 0.0255 | 0.0308                                             | 0.0276 |
| R <sub>1</sub> (all data)                 | 0.0403                                                           | 0.0362 | 0.0374                                             | 0.0341 |
| wR <sub>2</sub> ( <i>I</i> > 2 $\sigma$ ) | 0.0677                                                           | 0.0471 | 0.0664                                             | 0.0488 |
| wR <sub>2</sub> (all data)                | 0.0708                                                           | 0.0496 | 0.0720                                             | 0.0535 |
| Goodness of fit, <i>S</i>                 | 1.059                                                            | 1.0040 | 1.061                                              | 0.9511 |

**Table S5.** Select data from NMR monitoring of titration (replicate 1) of **2a** with triethylamine (TEA).

| Volume TEA added ( $\mu\text{L}$ ) | Chemical Shift (ppm) | Total volume sample ( $\mu\text{L}$ ) | Deprotonated (%) | [1a] (mM) | [1aH <sup>+</sup> ] (mM) | [TEA] (mM) | Equivalents of TEA added |
|------------------------------------|----------------------|---------------------------------------|------------------|-----------|--------------------------|------------|--------------------------|
| 0.05                               | 2.89                 | 600.5                                 | 1.4              | 0.08      | 5.32                     | 0.5        | 0.1                      |
| 0.1                                | 2.93                 | 601                                   | 3.8              | 0.20      | 5.19                     | 1.0        | 0.2                      |
| 0.15                               | 2.96                 | 601.5                                 | 6.3              | 0.34      | 5.05                     | 1.4        | 0.3                      |
| 0.2                                | 2.98                 | 602                                   | 7.5              | 0.40      | 4.98                     | 2.0        | 0.4                      |
| 0.25                               | 3.01                 | 602.5                                 | 9.8              | 0.53      | 4.85                     | 2.4        | 0.6                      |
| 0.35                               | 3.07                 | 603.5                                 | 14.5             | 0.78      | 4.59                     | 3.4        | 0.8                      |
| 0.5                                | 3.12                 | 605                                   | 17.6             | 0.94      | 4.41                     | 5.0        | 1.1                      |
| 0.75                               | 3.22                 | 607.5                                 | 24.8             | 1.33      | 4.01                     | 7.5        | 1.7                      |
| 1                                  | 3.27                 | 610                                   | 28.6             | 1.52      | 3.79                     | 10.2       | 2.2                      |
| 1.5                                | 3.38                 | 610.5                                 | 37.1             | 1.97      | 3.34                     | 15.7       | 3.3                      |
| 2                                  | 3.46                 | 611                                   | 42.3             | 2.25      | 3.06                     | 21.2       | 4.4                      |
| 3                                  | 3.59                 | 612                                   | 51.8             | 2.74      | 2.55                     | 32.4       | 6.6                      |
| 4.5                                | 3.70                 | 613.5                                 | 60.1             | 3.17      | 2.11                     | 49.5       | 10.0                     |
| 7                                  | 3.81                 | 616                                   | 68.4             | 3.60      | 1.66                     | 77.9       | 15.5                     |
| 10                                 | 3.90                 | 619                                   | 74.6             | 3.90      | 1.33                     | 112.0      | 22.1                     |
| 15                                 | 3.99                 | 624                                   | 81.0             | 4.20      | 0.99                     | 168.3      | 33.2                     |
| 25                                 | 4.07                 | 634                                   | 87.0             | 4.45      | 0.66                     | 278.5      | 55.4                     |
| 35                                 | 4.11                 | 644                                   | 89.9             | 4.52      | 0.51                     | 385.4      | 77.5                     |
| 45                                 | 4.14                 | 654                                   | 91.7             | 4.54      | 0.41                     | 489.1      | 99.7                     |
| 55                                 | 4.15                 | 664                                   | 93.0             | 4.54      | 0.34                     | 589.7      | 121.8                    |
| 65                                 | 4.17                 | 674                                   | 94.0             | 4.52      | 0.29                     | 687.4      | 143.9                    |
| 85                                 | 4.18                 | 694                                   | 95.2             | 4.44      | 0.23                     | 874.3      | 188.2                    |

**Table S6.** Select data from NMR monitoring of titration (replicate 2) of **2a** with triethylamine (TEA).

| Volume TEA added ( $\mu\text{L}$ ) | Chemical Shift (ppm) | Total volume sample ( $\mu\text{L}$ ) | Deprotonated (%) | [1a] (mM) | [1aH <sup>+</sup> ] (mM) | [TEA] (mM) | Equivalents of TEA added |
|------------------------------------|----------------------|---------------------------------------|------------------|-----------|--------------------------|------------|--------------------------|
| 0.05                               | 2.93                 | 600.5                                 | 4.1              | 0.22      | 5.17                     | 0.5        | 0.1                      |
| 0.1                                | 2.96                 | 601                                   | 6.6              | 0.36      | 5.03                     | 1.0        | 0.2                      |
| 0.15                               | 3.00                 | 601.5                                 | 9.3              | 0.50      | 4.89                     | 1.4        | 0.3                      |
| 0.2                                | 3.02                 | 602                                   | 10.7             | 0.58      | 4.81                     | 2.0        | 0.4                      |
| 0.25                               | 3.05                 | 602.5                                 | 12.5             | 0.67      | 4.71                     | 2.4        | 0.6                      |
| 0.35                               | 3.08                 | 603.5                                 | 15.3             | 0.82      | 4.55                     | 3.4        | 0.8                      |
| 0.5                                | 3.14                 | 605                                   | 19.1             | 1.02      | 4.33                     | 5.0        | 1.1                      |
| 0.75                               | 3.21                 | 607.5                                 | 24.8             | 1.32      | 4.01                     | 7.5        | 1.7                      |
| 1                                  | 3.28                 | 610                                   | 29.4             | 1.56      | 3.75                     | 10.2       | 2.2                      |
| 1.5                                | 3.38                 | 610.5                                 | 36.9             | 1.96      | 3.35                     | 15.7       | 3.3                      |
| 2                                  | 3.49                 | 611                                   | 44.5             | 2.36      | 2.94                     | 21.2       | 4.4                      |
| 3                                  | 3.61                 | 612                                   | 53.5             | 2.83      | 2.46                     | 32.4       | 6.6                      |
| 4.5                                | 3.73                 | 613.5                                 | 62.4             | 3.29      | 1.99                     | 49.5       | 10.0                     |
| 7                                  | 3.86                 | 616                                   | 71.4             | 3.75      | 1.51                     | 77.9       | 15.5                     |
| 10                                 | 3.94                 | 619                                   | 77.3             | 4.04      | 1.19                     | 112.0      | 22.1                     |
| 15                                 | 4.01                 | 624                                   | 82.8             | 4.30      | 0.89                     | 168.3      | 33.2                     |
| 25                                 | 4.10                 | 634                                   | 89.1             | 4.55      | 0.56                     | 278.5      | 55.4                     |
| 35                                 | 4.14                 | 644                                   | 91.7             | 4.62      | 0.42                     | 385.4      | 77.5                     |
| 45                                 | 4.16                 | 654                                   | 93.4             | 4.62      | 0.33                     | 489.1      | 99.7                     |
| 55                                 | 4.17                 | 664                                   | 94.5             | 4.61      | 0.27                     | 589.7      | 121.8                    |
| 65                                 | 4.18                 | 674                                   | 95.3             | 4.58      | 0.23                     | 687.4      | 143.9                    |
| 85                                 | 4.20                 | 694                                   | 96.5             | 4.50      | 0.16                     | 874.3      | 188.2                    |

**Table S7.** Select data from NMR monitoring of titration (replicate 3) of **2a** with triethylamine (TEA).

| Volume TEA added ( $\mu\text{L}$ ) | Chemical Shift (ppm) | Total volume sample ( $\mu\text{L}$ ) | Deprotonated (%) | [1a] (mM) | [1aH <sup>+</sup> ] (mM) | [TEA] (mM) | Equivalents of TEA added |
|------------------------------------|----------------------|---------------------------------------|------------------|-----------|--------------------------|------------|--------------------------|
| 0.05                               | 2.95                 | 600.5                                 | 5.8              | 0.31      | 5.08                     | 0.5        | 0.1                      |
| 0.1                                | 2.99                 | 601                                   | 8.6              | 0.47      | 4.93                     | 1.0        | 0.2                      |
| 0.15                               | 3.04                 | 601.5                                 | 12.0             | 0.64      | 4.74                     | 1.4        | 0.3                      |
| 0.2                                | 3.07                 | 602                                   | 14.1             | 0.76      | 4.62                     | 2.0        | 0.4                      |
| 0.25                               | 3.10                 | 602.5                                 | 16.6             | 0.89      | 4.48                     | 2.4        | 0.6                      |
| 0.35                               | 3.16                 | 603.5                                 | 20.5             | 1.10      | 4.27                     | 3.4        | 0.8                      |
| 0.5                                | 3.21                 | 605                                   | 24.3             | 1.30      | 4.06                     | 5.0        | 1.1                      |
| 0.75                               | 3.27                 | 607.5                                 | 28.6             | 1.53      | 3.81                     | 7.5        | 1.7                      |
| 1                                  | 3.32                 | 610                                   | 32.3             | 1.71      | 3.60                     | 10.2       | 2.2                      |
| 1.5                                | 3.36                 | 610.5                                 | 35.6             | 1.89      | 3.42                     | 15.7       | 3.3                      |
| 2                                  | 3.45                 | 611                                   | 42.2             | 2.24      | 3.06                     | 21.2       | 4.4                      |
| 3                                  | 3.59                 | 612                                   | 51.8             | 2.74      | 2.55                     | 32.4       | 6.6                      |
| 4.5                                | 3.71                 | 613.5                                 | 60.6             | 3.20      | 2.08                     | 49.5       | 10.0                     |
| 7                                  | 3.82                 | 616                                   | 69.0             | 3.63      | 1.63                     | 77.9       | 15.5                     |
| 10                                 | 3.91                 | 619                                   | 75.0             | 3.93      | 1.31                     | 112.0      | 22.1                     |
| 15                                 | 3.99                 | 624                                   | 81.0             | 4.20      | 0.99                     | 168.3      | 33.2                     |
| 25                                 | 4.07                 | 634                                   | 87.1             | 4.45      | 0.66                     | 278.5      | 55.4                     |
| 35                                 | 4.11                 | 644                                   | 90.1             | 4.53      | 0.50                     | 385.4      | 77.5                     |
| 45                                 | 4.14                 | 654                                   | 91.9             | 4.55      | 0.40                     | 489.1      | 99.7                     |
| 55                                 | 4.15                 | 664                                   | 93.1             | 4.54      | 0.34                     | 589.7      | 121.8                    |
| 65                                 | 4.17                 | 674                                   | 94.0             | 4.52      | 0.29                     | 687.4      | 143.9                    |
| 85                                 | 4.19                 | 694                                   | 95.4             | 4.45      | 0.22                     | 874.3      | 188.2                    |

**Table S8.** Select data from NMR monitoring of titration (replicate 1) of **2b** with acridine (ACR).

| Mass ACR added (mg) | Chemical Shift (ppm) | Total volume sample ( $\mu\text{L}$ ) | Deprotonated (%) | [1b] (mM) | [1bH <sup>+</sup> ] (mM) | [ACR] (mM) | Equivalents of ACR added |
|---------------------|----------------------|---------------------------------------|------------------|-----------|--------------------------|------------|--------------------------|
| 0.05                | 2.79                 | 501                                   | 2.3              | 0.08      | 3.28                     | 0.5        | 0.2                      |
| 0.07                | 2.82                 | 501.5                                 | 4.6              | 0.16      | 3.20                     | 0.7        | 0.2                      |
| 0.12                | 2.85                 | 502.5                                 | 8.0              | 0.27      | 3.08                     | 1.1        | 0.4                      |
| 0.17                | 2.87                 | 503.5                                 | 10.1             | 0.34      | 3.01                     | 1.6        | 0.6                      |
| 0.25                | 2.90                 | 505                                   | 12.7             | 0.42      | 2.91                     | 2.3        | 0.8                      |
| 0.37                | 2.94                 | 507.5                                 | 16.7             | 0.55      | 2.76                     | 3.5        | 1.2                      |
| 0.49                | 2.98                 | 510                                   | 20.0             | 0.66      | 2.64                     | 4.8        | 1.6                      |
| 0.74                | 3.04                 | 515                                   | 25.3             | 0.83      | 2.44                     | 7.2        | 2.5                      |
| 0.99                | 3.08                 | 520                                   | 29.4             | 0.95      | 2.29                     | 9.7        | 3.3                      |
| 1.24                | 3.12                 | 525                                   | 33.1             | 1.06      | 2.15                     | 12.1       | 4.1                      |
| 1.73                | 3.18                 | 535                                   | 39.2             | 1.23      | 1.91                     | 16.8       | 5.7                      |
| 2.47                | 3.26                 | 550                                   | 45.9             | 1.41      | 1.65                     | 23.7       | 8.2                      |
| 3.96                | 3.36                 | 580                                   | 55.7             | 1.62      | 1.29                     | 36.5       | 13.1                     |
| 5.94                | 3.44                 | 620                                   | 62.9             | 1.71      | 1.01                     | 51.7       | 19.7                     |
| 8.90                | 3.53                 | 680                                   | 72.1             | 1.79      | 0.69                     | 71.3       | 29.5                     |
| 12.37               | 3.61                 | 750                                   | 79.2             | 1.78      | 0.47                     | 90.3       | 41.0                     |
| 17.31               | 3.67                 | 850                                   | 84.6             | 1.67      | 0.31                     | 112.0      | 57.4                     |
| 22.26               | 3.70                 | 950                                   | 88.1             | 1.56      | 0.21                     | 129.2      | 73.8                     |
| 27.21               | 3.73                 | 1050                                  | 90.6             | 1.45      | 0.15                     | 143.2      | 90.2                     |
| 32.15               | 3.75                 | 1150                                  | 92.4             | 1.35      | 0.11                     | 154.7      | 106.6                    |
| 42.05               | 3.77                 | 1150                                  | 94.4             | 1.38      | 0.08                     | 202.7      | 139.4                    |
| 51.94               | 3.78                 | 1150                                  | 95.6             | 1.40      | 0.06                     | 250.7      | 172.2                    |

**Table S9.** Select data from NMR monitoring of titration (replicate 2) of **2b** with acridine (ACR).

| Mass ACR added (mg) | Chemical Shift (ppm) | Total volume sample ( $\mu\text{L}$ ) | Deprotonated (%) | [1b] (mM) | [1bH <sup>+</sup> ] (mM) | [ACR] (mM) | Equivalents of ACR added |
|---------------------|----------------------|---------------------------------------|------------------|-----------|--------------------------|------------|--------------------------|
| 0.05                | 2.81                 | 501                                   | 4.6              | 0.15      | 3.21                     | 0.5        | 0.2                      |
| 0.07                | 2.84                 | 501.5                                 | 6.8              | 0.23      | 3.13                     | 0.7        | 0.2                      |
| 0.12                | 2.88                 | 502.5                                 | 10.9             | 0.37      | 2.99                     | 1.1        | 0.4                      |
| 0.17                | 2.91                 | 503.5                                 | 13.3             | 0.44      | 2.90                     | 1.6        | 0.6                      |
| 0.25                | 2.93                 | 505                                   | 15.8             | 0.53      | 2.81                     | 2.3        | 0.8                      |
| 0.37                | 2.99                 | 507.5                                 | 20.6             | 0.68      | 2.63                     | 3.5        | 1.2                      |
| 0.49                | 3.02                 | 510                                   | 23.9             | 0.79      | 2.51                     | 4.8        | 1.6                      |
| 0.74                | 3.08                 | 515                                   | 29.5             | 0.96      | 2.31                     | 7.2        | 2.5                      |
| 0.99                | 3.12                 | 520                                   | 33.3             | 1.08      | 2.16                     | 9.7        | 3.3                      |
| 1.24                | 3.17                 | 525                                   | 37.5             | 1.20      | 2.01                     | 12.1       | 4.1                      |
| 1.73                | 3.22                 | 535                                   | 43.1             | 1.35      | 1.79                     | 16.8       | 5.7                      |
| 2.47                | 3.29                 | 550                                   | 49.4             | 1.51      | 1.55                     | 23.7       | 8.2                      |
| 3.96                | 3.40                 | 580                                   | 59.1             | 1.71      | 1.19                     | 36.5       | 13.1                     |
| 5.94                | 3.49                 | 620                                   | 68.0             | 1.85      | 0.87                     | 51.7       | 19.7                     |
| 8.90                | 3.56                 | 680                                   | 74.7             | 1.85      | 0.63                     | 71.3       | 29.5                     |
| 12.37               | 3.63                 | 750                                   | 81.3             | 1.82      | 0.42                     | 90.3       | 41.0                     |
| 17.31               | 3.70                 | 850                                   | 87.3             | 1.73      | 0.25                     | 112.0      | 57.4                     |
| 22.26               | 3.73                 | 950                                   | 90.4             | 1.60      | 0.17                     | 129.2      | 73.8                     |
| 27.21               | 3.75                 | 1050                                  | 92.4             | 1.48      | 0.12                     | 143.2      | 90.2                     |
| 32.15               | 3.76                 | 1150                                  | 93.3             | 1.37      | 0.10                     | 154.7      | 106.6                    |
| 42.05               | 3.78                 | 1150                                  | 95.4             | 1.40      | 0.07                     | 202.7      | 139.4                    |
| 51.94               | 3.79                 | 1150                                  | 96.5             | 1.41      | 0.05                     | 250.7      | 172.2                    |

**Table S10.** Select data from NMR monitoring of titration (replicate 3) of **2b** with acridine (ACR).

| Mass ACR added (mg) | Chemical Shift (ppm) | Total volume sample ( $\mu\text{L}$ ) | Deprotonated (%) | [1b] (mM) | [1bH <sup>+</sup> ] (mM) | [ACR] (mM) | Equivalents of ACR added |
|---------------------|----------------------|---------------------------------------|------------------|-----------|--------------------------|------------|--------------------------|
| 0.05                | 2.77                 | 501                                   | 0.2              | 0.01      | 3.35                     | 0.5        | 0.2                      |
| 0.07                | 2.78                 | 501.5                                 | 1.6              | 0.05      | 3.30                     | 0.7        | 0.2                      |
| 0.12                | 2.81                 | 502.5                                 | 3.8              | 0.13      | 3.22                     | 1.1        | 0.4                      |
| 0.17                | 2.84                 | 503.5                                 | 6.8              | 0.23      | 3.12                     | 1.6        | 0.6                      |
| 0.25                | 2.86                 | 505                                   | 8.6              | 0.29      | 3.05                     | 2.3        | 0.8                      |
| 0.37                | 2.90                 | 507.5                                 | 12.4             | 0.41      | 2.90                     | 3.5        | 1.2                      |
| 0.49                | 2.93                 | 510                                   | 15.1             | 0.50      | 2.80                     | 4.8        | 1.6                      |
| 0.74                | 2.98                 | 515                                   | 19.7             | 0.64      | 2.63                     | 7.2        | 2.5                      |
| 0.99                | 3.02                 | 520                                   | 23.7             | 0.77      | 2.47                     | 9.7        | 3.3                      |
| 1.24                | 3.05                 | 525                                   | 26.5             | 0.85      | 2.36                     | 12.1       | 4.1                      |
| 1.73                | 3.12                 | 535                                   | 33.1             | 1.04      | 2.11                     | 16.8       | 5.7                      |
| 2.47                | 3.18                 | 550                                   | 39.0             | 1.19      | 1.87                     | 23.7       | 8.2                      |
| 3.96                | 3.29                 | 580                                   | 49.2             | 1.43      | 1.48                     | 36.5       | 13.1                     |
| 5.94                | 3.39                 | 620                                   | 58.3             | 1.58      | 1.13                     | 51.7       | 19.7                     |
| 8.90                | 3.48                 | 680                                   | 67.5             | 1.67      | 0.80                     | 71.3       | 29.5                     |
| 12.37               | 3.55                 | 750                                   | 74.1             | 1.66      | 0.58                     | 90.3       | 41.0                     |
| 17.31               | 3.63                 | 850                                   | 80.8             | 1.60      | 0.38                     | 112.0      | 57.4                     |
| 22.26               | 3.67                 | 950                                   | 84.6             | 1.50      | 0.27                     | 129.2      | 73.8                     |
| 27.21               | 3.70                 | 1050                                  | 87.4             | 1.40      | 0.20                     | 143.2      | 90.2                     |
| 32.15               | 3.72                 | 1150                                  | 89.6             | 1.31      | 0.15                     | 154.7      | 106.6                    |
| 42.05               | 3.75                 | 1150                                  | 92.1             | 1.35      | 0.12                     | 202.7      | 139.4                    |
| 51.94               | 3.77                 | 1150                                  | 93.8             | 1.37      | 0.09                     | 250.7      | 172.2                    |



**Table S11.** Natural population analysis (DKH-PBE0/old-DKH-TZVPP//PBE0/def2-TZVPP) for **1a-cH<sup>+</sup>**.

| Compound               | NPA Pn <sup>a</sup> (e <sup>-</sup> ) | NPA O <sup>b</sup> (e <sup>-</sup> ) | NPA H <sup>c</sup> (e <sup>-</sup> ) |
|------------------------|---------------------------------------|--------------------------------------|--------------------------------------|
| <b>1aH<sup>+</sup></b> | 2.17761                               | -1.07558                             | 0.49758                              |
| <b>1bH<sup>+</sup></b> | 1.84652                               | -0.98745                             | 0.50877                              |
| <b>1cH<sup>+</sup></b> | 1.91694                               | -0.99183                             | 0.53603                              |

<sup>a</sup> Natural population of pnictogen atom. <sup>b</sup> Natural population of O atom. <sup>c</sup> Natural population of protic H atom.

**Table S12.** Optimized coordinates (PBE0/def2-TZVPP) for **1aH<sup>+</sup>**.

|    |          |          |          |
|----|----------|----------|----------|
| Sb | 4.857686 | 3.455658 | 4.213142 |
| O  | 5.781276 | 4.933884 | 5.05092  |
| C  | 5.855477 | 1.81983  | 5.157928 |
| C  | 7.152842 | 1.004911 | 6.990095 |
| H  | 7.521315 | 1.104982 | 8.003394 |
| C  | 3.20321  | 6.432994 | 4.388681 |
| H  | 4.029391 | 6.06504  | 3.773515 |
| C  | 7.533061 | -0.08743 | 6.234865 |
| H  | 8.206765 | -0.82586 | 6.652023 |
| C  | 5.347469 | 3.726753 | 2.145358 |
| C  | 5.900657 | 3.116238 | 7.405674 |
| H  | 5.159074 | 3.741067 | 6.901471 |
| C  | 6.166257 | 0.679823 | 4.397006 |
| C  | 2.86967  | 3.89634  | 4.859413 |
| C  | 7.096305 | 4.00072  | 7.753495 |
| H  | 7.843621 | 3.436396 | 8.315163 |
| H  | 6.776058 | 4.837242 | 8.376893 |
| H  | 7.570258 | 4.404315 | 6.860236 |
| C  | 2.466086 | 5.240845 | 4.967399 |
| C  | 6.299315 | 1.981667 | 6.482806 |
| C  | 5.56381  | 0.360859 | 3.045057 |
| H  | 4.87471  | 1.169845 | 2.774701 |
| C  | 2.353295 | 1.375691 | 5.043859 |
| H  | 3.285877 | 1.304749 | 4.469457 |
| C  | 2.063065 | 2.836971 | 5.306815 |
| C  | 1.272765 | 5.492478 | 5.639078 |
| H  | 0.93916  | 6.516617 | 5.749545 |
| C  | 7.027358 | -0.2564  | 4.960147 |
| H  | 7.29335  | -1.14031 | 4.393347 |
| C  | 6.636466 | 4.18014  | 1.804875 |
| C  | 6.868244 | 4.509972 | 0.47225  |

|   |          |          |          |
|---|----------|----------|----------|
| H | 7.847885 | 4.868382 | 0.181322 |
| C | 0.501881 | 4.470197 | 6.157649 |
| H | -0.4161  | 4.698727 | 6.685085 |
| C | 3.778908 | 7.324202 | 5.488734 |
| H | 2.975104 | 7.760534 | 6.085267 |
| H | 4.344343 | 8.149578 | 5.051062 |
| H | 4.437382 | 6.769599 | 6.155138 |
| C | 2.30957  | 7.260068 | 3.462904 |
| H | 1.868149 | 6.659865 | 2.667424 |
| H | 2.89675  | 8.055107 | 3.000074 |
| H | 1.495566 | 7.735997 | 4.011385 |
| C | 1.252832 | 0.757367 | 4.180483 |
| H | 0.307681 | 0.718192 | 4.724175 |
| H | 1.515764 | -0.2653  | 3.904437 |
| H | 1.083506 | 1.3286   | 3.266904 |
| C | 4.351757 | 3.525701 | 1.175174 |
| C | 2.818861 | 1.620734 | 0.619119 |
| H | 1.893996 | 1.115422 | 0.90194  |
| H | 3.645156 | 0.920751 | 0.748087 |
| H | 2.749239 | 1.85823  | -0.44341 |
| C | 7.794646 | 4.329169 | 2.773724 |
| H | 7.504855 | 3.913852 | 3.742675 |
| C | 8.163692 | 5.801748 | 2.972172 |
| H | 8.59276  | 6.215969 | 2.057801 |
| H | 8.903418 | 5.911357 | 3.766473 |
| H | 7.303845 | 6.436143 | 3.211904 |
| C | 5.241622 | 2.600026 | 8.6847   |
| H | 5.936226 | 2.010144 | 9.284712 |
| H | 4.368756 | 1.980156 | 8.479334 |
| H | 4.91749  | 3.44385  | 9.296156 |
| C | 3.007603 | 2.888554 | 1.452534 |
| H | 2.979443 | 2.586316 | 2.506599 |
| C | 6.603214 | 0.263383 | 1.933641 |
| H | 7.345804 | -0.50358 | 2.160401 |
| H | 7.126157 | 1.207138 | 1.783809 |
| H | 6.126355 | -0.01009 | 0.990433 |
| C | 4.738357 | -0.92567 | 3.112275 |
| H | 4.204713 | -1.08367 | 2.173434 |
| H | 4.00959  | -0.90197 | 3.923086 |
| H | 5.38209  | -1.79184 | 3.273206 |
| C | 9.029696 | 3.543204 | 2.335339 |
| H | 8.815314 | 2.480734 | 2.222892 |
| H | 9.816681 | 3.648005 | 3.084087 |
| H | 9.428654 | 3.908916 | 1.388053 |
| C | 0.883029 | 3.155872 | 5.970979 |

|   |          |          |          |
|---|----------|----------|----------|
| H | 0.248035 | 2.357885 | 6.335693 |
| C | 5.881167 | 4.384482 | -0.48619 |
| H | 6.086467 | 4.657397 | -1.51397 |
| C | 2.548084 | 0.568129 | 6.322108 |
| H | 3.386777 | 0.939138 | 6.909617 |
| H | 2.741171 | -0.47979 | 6.085195 |
| H | 1.654611 | 0.603708 | 6.94805  |
| C | 1.848944 | 3.854343 | 1.23052  |
| H | 0.896329 | 3.363457 | 1.437702 |
| H | 1.823813 | 4.20226  | 0.196069 |
| H | 1.927569 | 4.727258 | 1.877043 |
| C | 4.64263  | 3.881969 | -0.13798 |
| H | 3.88698  | 3.748459 | -0.90226 |
| H | 6.234058 | 5.499507 | 4.419825 |

**Table S13.** Optimized coordinates (PBE0/def2-TZVPP) for **1bH<sup>+</sup>**.

|    |          |          |          |
|----|----------|----------|----------|
| As | 6.289453 | 2.905412 | 4.344392 |
| O  | 5.473318 | 4.237814 | 3.553247 |
| C  | 5.323142 | 1.404029 | 3.569678 |
| C  | 4.902389 | 1.521639 | 2.226964 |
| C  | 8.104357 | 3.177329 | 3.685703 |
| C  | 5.914101 | 3.264246 | 6.227762 |
| C  | 4.64512  | 3.788546 | 6.568949 |
| C  | 6.932098 | 3.118525 | 7.190626 |
| C  | 8.229478 | 2.371248 | 6.964307 |
| H  | 8.213554 | 1.952121 | 5.955363 |
| C  | 8.844619 | 2.069608 | 3.228417 |
| C  | 8.561299 | 4.50172  | 3.497715 |
| C  | 6.701118 | 3.624919 | 8.465017 |
| H  | 7.477754 | 3.53904  | 9.214626 |
| C  | 4.931846 | 0.319215 | 4.379183 |
| C  | 7.939822 | 5.755873 | 4.090177 |
| H  | 7.16298  | 5.461222 | 4.799085 |
| C  | 9.706007 | 4.675272 | 2.726426 |
| H  | 10.07226 | 5.679076 | 2.553641 |
| C  | 3.428534 | 3.869375 | 5.656167 |
| H  | 3.645326 | 3.365663 | 4.713676 |
| C  | 3.984628 | 0.582926 | 1.764687 |
| H  | 3.634604 | 0.654485 | 0.742724 |
| C  | 5.497384 | 4.212858 | 8.797938 |
| H  | 5.340167 | 4.604206 | 9.795438 |
| C  | 5.381507 | 2.565427 | 1.232451 |
| H  | 6.161122 | 3.171411 | 1.693713 |
| C  | 8.562025 | 0.63063  | 3.607415 |

|   |          |          |          |
|---|----------|----------|----------|
| H | 7.691742 | 0.613318 | 4.268412 |
| C | 4.479625 | 4.264753 | 7.866356 |
| H | 3.522101 | 4.681206 | 8.152511 |
| C | 9.457084 | 3.269176 | 7.067218 |
| H | 9.447558 | 4.047414 | 6.306627 |
| H | 10.36762 | 2.68155  | 6.936087 |
| H | 9.51323  | 3.748617 | 8.046242 |
| C | 6.010627 | 1.922482 | -0.00458 |
| H | 6.868192 | 1.298123 | 0.245028 |
| H | 6.35471  | 2.705065 | -0.68309 |
| H | 5.294994 | 1.307943 | -0.55296 |
| C | 9.738746 | 0.058893 | 4.403306 |
| H | 10.61865 | -0.05805 | 3.768902 |
| H | 9.483815 | -0.92711 | 4.796095 |
| H | 10.02052 | 0.700049 | 5.239446 |
| C | 4.003043 | -0.57385 | 3.856587 |
| H | 3.673696 | -1.40796 | 4.463733 |
| C | 9.975265 | 2.316781 | 2.457635 |
| H | 10.55037 | 1.4795   | 2.08225  |
| C | 8.354013 | 1.195553 | 7.935942 |
| H | 8.495884 | 1.543573 | 8.960203 |
| H | 9.221286 | 0.586364 | 7.675861 |
| H | 7.471302 | 0.55522  | 7.92439  |
| C | 10.38859 | 3.604671 | 2.182469 |
| H | 11.26664 | 3.775333 | 1.571717 |
| C | 3.513624 | -0.43301 | 2.572758 |
| H | 2.786181 | -1.13787 | 2.189099 |
| C | 3.055578 | 5.324711 | 5.356317 |
| H | 2.697749 | 5.823617 | 6.25875  |
| H | 2.2598   | 5.368619 | 4.611745 |
| H | 3.888926 | 5.934303 | 4.98999  |
| C | 2.213507 | 3.152265 | 6.246849 |
| H | 2.410008 | 2.095294 | 6.420649 |
| H | 1.376087 | 3.224993 | 5.550858 |
| H | 1.89539  | 3.598191 | 7.189987 |
| C | 8.957115 | 6.570194 | 4.893571 |
| H | 9.439255 | 5.981782 | 5.673305 |
| H | 8.453169 | 7.411767 | 5.37225  |
| H | 9.739175 | 6.983006 | 4.255031 |
| C | 7.320106 | 6.643533 | 3.010071 |
| H | 8.094886 | 7.031348 | 2.345746 |
| H | 6.823883 | 7.503618 | 3.464802 |
| H | 6.595449 | 6.104059 | 2.402864 |
| C | 4.511562 | 0.0275   | 6.871893 |
| H | 4.108369 | 1.026822 | 7.026417 |

|   |          |          |          |
|---|----------|----------|----------|
| H | 4.981384 | -0.29122 | 7.80446  |
| H | 3.678172 | -0.65052 | 6.678419 |
| C | 5.526382 | -0.00829 | 5.734696 |
| H | 6.29762  | 0.732042 | 5.960494 |
| C | 8.252974 | -0.26576 | 2.412771 |
| H | 7.337726 | 0.035121 | 1.905986 |
| H | 8.13114  | -1.30056 | 2.738233 |
| H | 9.067917 | -0.24716 | 1.686939 |
| C | 4.245332 | 3.496101 | 0.811127 |
| H | 3.478948 | 2.948568 | 0.25865  |
| H | 4.62713  | 4.279537 | 0.154019 |
| H | 3.773244 | 3.970553 | 1.66982  |
| C | 6.216967 | -1.37471 | 5.697657 |
| H | 5.487661 | -2.1804  | 5.601827 |
| H | 6.768338 | -1.54101 | 6.624847 |
| H | 6.914136 | -1.45946 | 4.86392  |
| H | 5.115867 | 4.861235 | 4.192602 |

**Table S14.** Optimized coordinates (PBE0/def2-TZVPP) for **1cH<sup>+</sup>**.

|   |          |          |          |
|---|----------|----------|----------|
| P | 8.871935 | 13.11436 | 1.997949 |
| O | 10.03371 | 13.73797 | 2.889692 |
| C | 8.504041 | 14.57381 | 0.978939 |
| C | 6.249361 | 12.95836 | 3.06958  |
| C | 8.070604 | 12.03614 | 4.437406 |
| C | 7.612365 | 12.61648 | 3.223631 |
| C | 8.614216 | 16.84899 | -0.62094 |
| H | 8.690013 | 17.73241 | -1.24308 |
| C | 9.036313 | 10.46444 | 1.009677 |
| C | 5.413193 | 12.85526 | 4.176055 |
| H | 4.372338 | 13.13555 | 4.075029 |
| C | 9.680701 | 11.71759 | 1.153829 |
| C | 11.05883 | 11.86004 | 0.831759 |
| C | 7.178527 | 11.94611 | 5.498037 |
| H | 7.514311 | 11.51899 | 6.434371 |
| C | 5.872426 | 12.38281 | 5.387569 |
| H | 5.204319 | 12.32007 | 6.237666 |
| C | 8.333645 | 14.45848 | -0.42177 |
| C | 8.662883 | 16.96383 | 0.754049 |
| H | 8.755046 | 17.94623 | 1.198494 |
| C | 5.594846 | 13.33069 | 1.753695 |
| H | 6.347822 | 13.27207 | 0.967482 |
| C | 8.598033 | 15.85559 | 1.590686 |
| C | 8.613061 | 16.15188 | 3.085551 |
| H | 8.414819 | 15.23413 | 3.637067 |

|   |          |          |          |
|---|----------|----------|----------|
| C | 8.42029  | 15.60947 | -1.19484 |
| H | 8.312367 | 15.52993 | -2.2691  |
| C | 7.943952 | 13.18443 | -1.14547 |
| H | 7.839177 | 12.38761 | -0.40944 |
| C | 11.7698  | 10.70865 | 0.511722 |
| H | 12.82327 | 10.79357 | 0.277946 |
| C | 9.468646 | 11.47714 | 4.687277 |
| H | 10.02437 | 11.44845 | 3.74501  |
| C | 11.8394  | 13.16711 | 0.776185 |
| H | 11.16278 | 14.00356 | 0.937162 |
| C | 9.967904 | 16.70454 | 3.531835 |
| H | 10.78931 | 16.04068 | 3.26844  |
| H | 9.974076 | 16.85371 | 4.613521 |
| H | 10.15999 | 17.6753  | 3.069964 |
| C | 5.021514 | 14.74305 | 1.737055 |
| H | 4.315734 | 14.89528 | 2.555811 |
| H | 4.482357 | 14.91685 | 0.803839 |
| H | 5.803472 | 15.49567 | 1.815221 |
| C | 4.495957 | 12.32127 | 1.40409  |
| H | 4.846084 | 11.29035 | 1.460165 |
| H | 4.133104 | 12.5041  | 0.391132 |
| H | 3.643599 | 12.41717 | 2.078282 |
| C | 7.534827 | 10.25227 | 1.050735 |
| H | 7.055576 | 11.21743 | 1.216353 |
| C | 9.813081 | 9.354904 | 0.699941 |
| H | 9.335576 | 8.387727 | 0.6056   |
| C | 6.575689 | 13.36098 | -1.81361 |
| H | 5.822355 | 13.73733 | -1.12093 |
| H | 6.228873 | 12.40545 | -2.21127 |
| H | 6.633541 | 14.06162 | -2.6477  |
| C | 8.965005 | 12.72325 | -2.17992 |
| H | 9.170379 | 13.506   | -2.91252 |
| H | 8.579903 | 11.85995 | -2.72602 |
| H | 9.907673 | 12.43184 | -1.72    |
| C | 12.92414 | 13.22213 | 1.852026 |
| H | 13.68035 | 12.45195 | 1.68709  |
| H | 12.52202 | 13.08092 | 2.854947 |
| H | 13.4296  | 14.18904 | 1.824802 |
| C | 11.17147 | 9.464566 | 0.480689 |
| H | 11.75855 | 8.584538 | 0.247811 |
| C | 7.042069 | 9.731523 | -0.30375 |
| H | 7.39141  | 10.3445  | -1.13478 |
| H | 5.950793 | 9.717403 | -0.32278 |
| H | 7.386153 | 8.711437 | -0.48011 |
| C | 9.435467 | 10.02143 | 5.157477 |

|   |          |          |          |
|---|----------|----------|----------|
| H | 8.915741 | 9.915249 | 6.110078 |
| H | 10.45586 | 9.661471 | 5.299182 |
| H | 8.949404 | 9.372783 | 4.4305   |
| C | 7.513537 | 17.13905 | 3.485672 |
| H | 7.655643 | 18.11954 | 3.029385 |
| H | 7.536714 | 17.28103 | 4.567738 |
| H | 6.518372 | 16.78548 | 3.219555 |
| C | 10.24114 | 12.31495 | 5.716284 |
| H | 10.27616 | 13.38743 | 5.493789 |
| H | 11.26582 | 11.95345 | 5.813706 |
| H | 9.766916 | 12.23622 | 6.69587  |
| C | 12.47657 | 13.38759 | -0.59758 |
| H | 12.99361 | 14.34885 | -0.60347 |
| H | 11.73596 | 13.40453 | -1.39612 |
| H | 13.21419 | 12.62037 | -0.83743 |
| C | 7.073017 | 9.311942 | 2.158751 |
| H | 7.576661 | 8.345589 | 2.094577 |
| H | 6.001172 | 9.125375 | 2.068655 |
| H | 7.255001 | 9.728445 | 3.148346 |
| H | 10.21303 | 13.27149 | 3.713139 |

**Table S15.** Optimized coordinates (PBE0/def2-TZVPP) for *p*-nitrophenol.

|   |          |          |          |
|---|----------|----------|----------|
| O | 11.33395 | 10.01982 | 8.156644 |
| H | 10.56261 | 9.640683 | 8.583652 |
| O | 10.22561 | 8.781734 | 2.159532 |
| O | 12.118   | 9.792252 | 2.010708 |
| N | 11.18103 | 9.352491 | 2.644543 |
| C | 10.1565  | 9.027604 | 4.848025 |
| H | 9.335955 | 8.527676 | 4.352994 |
| C | 11.25741 | 9.837114 | 6.824381 |
| C | 11.20594 | 9.520945 | 4.091593 |
| C | 10.1836  | 9.186219 | 6.219297 |
| H | 9.369111 | 8.804352 | 6.82556  |
| C | 12.28066 | 10.17046 | 4.681044 |
| H | 13.08024 | 10.54144 | 4.05549  |
| C | 12.30656 | 10.32898 | 6.049876 |
| H | 13.13029 | 10.83032 | 6.5406   |

**Table S16.** Optimized coordinates (PBE0/def2-TZVPP) for *p*-nitrophenoxide.

|   |          |          |          |
|---|----------|----------|----------|
| O | 11.30498 | 9.975346 | 8.141701 |
| O | 10.21904 | 8.780122 | 2.146187 |
| O | 12.11221 | 9.803221 | 1.989992 |

|   |          |          |          |
|---|----------|----------|----------|
| N | 11.17824 | 9.359612 | 2.665552 |
| C | 10.16001 | 9.024365 | 4.858222 |
| H | 9.336234 | 8.524747 | 4.364111 |
| C | 11.2759  | 9.836869 | 6.904521 |
| C | 11.20825 | 9.51894  | 4.062087 |
| C | 10.18747 | 9.173987 | 6.214135 |
| H | 9.379064 | 8.792793 | 6.828996 |
| C | 12.28874 | 10.17388 | 4.679444 |
| H | 13.08539 | 10.54856 | 4.049117 |
| C | 12.32516 | 10.32875 | 6.034416 |
| H | 13.1588  | 10.8335  | 6.511    |

**Table S17.** Optimized coordinates (PBE0/def2-TZVPP) for 2,4-dinitrophenoxide.

|   |          |          |          |
|---|----------|----------|----------|
| O | 6.083273 | 11.73542 | 6.876694 |
| O | 6.877526 | 12.41523 | 2.923155 |
| O | 1.167935 | 10.24006 | 3.422735 |
| O | 7.572447 | 12.45163 | 4.952385 |
| O | 2.502744 | 10.86709 | 1.854652 |
| N | 6.70983  | 12.22837 | 4.09976  |
| N | 2.228177 | 10.666   | 3.017049 |
| C | 5.437052 | 11.71508 | 4.555889 |
| C | 5.198114 | 11.49872 | 5.929822 |
| C | 4.468727 | 11.44576 | 3.6006   |
| H | 4.67253  | 11.61798 | 2.553706 |
| C | 2.981129 | 10.73386 | 5.363384 |
| H | 2.010886 | 10.34878 | 5.645035 |
| C | 3.254463 | 10.95765 | 4.014774 |
| C | 3.942027 | 11.00264 | 6.30457  |
| H | 3.760035 | 10.83885 | 7.358273 |
| H | 6.890721 | 12.07182 | 6.425699 |

**Table S18.** Optimized coordinates (PBE0/def2-TZVPP) for 2,4-dinitrophenoxide.

|   |          |          |          |
|---|----------|----------|----------|
| O | 6.127129 | 11.68551 | 6.852463 |
| O | 6.760229 | 12.67159 | 2.915998 |
| O | 1.160534 | 10.29019 | 3.426521 |
| O | 7.765341 | 11.90973 | 4.655477 |
| O | 2.490732 | 10.92459 | 1.855459 |
| N | 6.757286 | 12.10927 | 4.007764 |
| N | 2.248703 | 10.71125 | 3.039069 |
| C | 5.494916 | 11.64795 | 4.532107 |
| C | 5.303401 | 11.44358 | 5.970949 |
| C | 4.495863 | 11.43366 | 3.609212 |



|   |          |          |          |
|---|----------|----------|----------|
| H | 4.688159 | 11.62865 | 2.564318 |
| C | 3.005694 | 10.70943 | 5.373375 |
| H | 2.031112 | 10.3348  | 5.65753  |
| C | 3.257621 | 10.95766 | 4.00666  |
| C | 3.973558 | 10.94223 | 6.294121 |
| H | 3.79361  | 10.76541 | 7.348216 |

**Table S19.** Optimized coordinates (PBE0/def2-TZVPP) for 2,4,6-trinitrophenol.

|   |          |          |          |
|---|----------|----------|----------|
| O | 6.997438 | 3.555826 | 10.28335 |
| O | 6.51942  | 5.615749 | 11.9503  |
| O | 7.571542 | 1.242428 | 9.472688 |
| O | 9.367461 | 0.253237 | 10.10184 |
| N | 8.619071 | 1.192469 | 10.11962 |
| O | 12.38459 | 2.287312 | 13.14263 |
| N | 7.716904 | 5.753361 | 11.90637 |
| O | 8.322346 | 6.799038 | 11.983   |
| C | 8.100951 | 3.46676  | 10.97676 |
| C | 8.956331 | 2.339161 | 10.94286 |
| C | 8.531224 | 4.537859 | 11.78539 |
| C | 10.13221 | 2.277337 | 11.66791 |
| H | 10.75385 | 1.394457 | 11.62302 |
| N | 11.73475 | 3.305998 | 13.20949 |
| C | 9.711056 | 4.501444 | 12.48659 |
| H | 10.02093 | 5.35501  | 13.07379 |
| O | 12.01853 | 4.285332 | 13.86136 |
| C | 10.49369 | 3.359016 | 12.43532 |
| H | 6.914601 | 2.707239 | 9.783846 |

**Table S20.** Optimized coordinates (PBE0/def2-TZVPP) for 2,4,6-trinitrophenoxide.

|   |          |          |          |
|---|----------|----------|----------|
| O | 7.213539 | 3.627223 | 9.99123  |
| O | 6.552728 | 5.654361 | 11.75563 |
| O | 7.509566 | 0.877335 | 9.934185 |
| O | 9.604801 | 0.445926 | 9.720113 |
| N | 8.678163 | 1.139481 | 10.11707 |
| O | 12.34863 | 2.264832 | 13.20057 |
| N | 7.754798 | 5.752113 | 11.86921 |
| O | 8.334755 | 6.798323 | 12.1265  |
| C | 8.124653 | 3.504032 | 10.79203 |
| C | 9.002511 | 2.328087 | 10.88047 |
| C | 8.55684  | 4.553238 | 11.72645 |
| C | 10.14419 | 2.27724  | 11.62858 |
| H | 10.76355 | 1.392057 | 11.60561 |

|   |          |          |          |
|---|----------|----------|----------|
| N | 11.67556 | 3.286322 | 13.24029 |
| C | 9.700009 | 4.495837 | 12.47098 |
| H | 9.97543  | 5.329942 | 13.10031 |
| O | 11.96055 | 4.250557 | 13.93816 |
| C | 10.50146 | 3.357063 | 12.43257 |

**Table S21.** Optimized coordinates (PBE0/def2-TZVPP) for  $3^+$ .

|   |          |          |          |
|---|----------|----------|----------|
| P | 1.517571 | 16.0625  | 10.61671 |
| O | 0.581484 | 17.31536 | 10.33881 |
| C | 3.277606 | 15.13647 | 8.633907 |
| C | 2.918345 | 16.80137 | 11.51992 |
| C | 0.421532 | 14.96228 | 11.5576  |
| C | 0.327287 | 13.56824 | 11.3878  |
| C | 1.43951  | 15.62663 | 6.591065 |
| H | 0.730254 | 15.77421 | 5.786891 |
| C | 1.950944 | 15.53268 | 8.938991 |
| C | 3.655368 | 15.0877  | 7.298288 |
| H | 4.670332 | 14.80555 | 7.048531 |
| C | 0.992006 | 15.70366 | 7.90504  |
| C | -0.72796 | 12.90667 | 12.01126 |
| H | -0.82459 | 11.83614 | 11.88143 |
| C | 3.4182   | 16.27237 | 12.73261 |
| C | 2.759893 | 15.36404 | 6.284536 |
| H | 3.08187  | 15.33368 | 5.250751 |
| C | -0.48626 | 15.64801 | 12.4009  |
| C | 1.330335 | 12.72463 | 10.6345  |
| H | 2.145851 | 13.37384 | 10.3178  |
| C | -1.63694 | 13.57396 | 12.80516 |
| H | -2.44411 | 13.02994 | 13.28023 |
| C | 3.389612 | 18.05161 | 11.0309  |
| C | -1.5048  | 14.93655 | 13.01344 |
| H | -2.20463 | 15.44712 | 13.6599  |
| C | 3.134659 | 14.88022 | 13.26202 |
| H | 2.536579 | 14.34293 | 12.52714 |
| C | 4.292449 | 14.62882 | 9.645134 |
| H | 3.830319 | 14.62822 | 10.63411 |
| C | 2.348593 | 14.90672 | 14.57099 |
| H | 2.910577 | 15.41932 | 15.35397 |
| H | 2.155288 | 13.8896  | 14.91724 |
| H | 1.388374 | 15.4117  | 14.46255 |
| C | 4.284308 | 17.05535 | 13.48769 |
| H | 4.656346 | 16.67026 | 14.42854 |

|   |          |          |          |
|---|----------|----------|----------|
| C | 4.663801 | 13.17664 | 9.321269 |
| H | 5.272383 | 13.12085 | 8.417542 |
| H | 3.787597 | 12.54717 | 9.164734 |
| H | 5.250498 | 12.75212 | 10.13805 |
| C | 1.930447 | 11.64636 | 11.53939 |
| H | 1.186874 | 10.89325 | 11.80409 |
| H | 2.3296   | 12.05961 | 12.46632 |
| H | 2.741847 | 11.13348 | 11.02021 |
| C | 4.432977 | 14.09002 | 13.44323 |
| H | 5.026947 | 14.0613  | 12.52859 |
| H | 4.206877 | 13.06247 | 13.73391 |
| H | 5.056369 | 14.51896 | 14.22879 |
| C | -0.49919 | 15.93783 | 8.097184 |
| H | -0.74557 | 15.83156 | 9.153419 |
| C | 3.043368 | 18.68872 | 9.690351 |
| H | 2.39172  | 18.02831 | 9.124096 |
| C | -0.91401 | 17.33544 | 7.636975 |
| H | -0.75097 | 17.45088 | 6.56358  |
| H | -0.35356 | 18.1186  | 8.145865 |
| H | -1.97851 | 17.49298 | 7.822109 |
| C | -1.3346  | 14.89121 | 7.355939 |
| H | -2.3915  | 15.0492  | 7.57846  |
| H | -1.08077 | 13.87318 | 7.650036 |
| H | -1.21758 | 14.9665  | 6.274043 |
| C | 0.734502 | 12.08732 | 9.383147 |
| H | 1.476882 | 11.45615 | 8.890706 |
| H | 0.406669 | 12.83956 | 8.667546 |
| H | -0.1211  | 11.45586 | 9.630306 |
| C | 5.563503 | 15.46752 | 9.732182 |
| H | 6.283087 | 14.98375 | 10.39545 |
| H | 5.369169 | 16.46526 | 10.12089 |
| H | 6.038444 | 15.5662  | 8.754201 |
| C | 4.694575 | 18.30001 | 13.05713 |
| H | 5.366087 | 18.89345 | 13.66552 |
| C | 4.270269 | 18.77068 | 11.83075 |
| H | 4.633099 | 19.72755 | 11.47787 |
| C | 4.28981  | 18.90592 | 8.830216 |
| H | 5.006296 | 19.57439 | 9.310383 |
| H | 4.000775 | 19.36265 | 7.881923 |
| H | 4.798383 | 17.96899 | 8.607331 |
| C | 2.307851 | 20.01551 | 9.875366 |
| H | 1.411562 | 19.90569 | 10.48476 |
| H | 2.01115  | 20.41801 | 8.905235 |
| H | 2.945134 | 20.75918 | 10.35767 |
| C | -0.35294 | 17.1385  | 12.59979 |

|   |          |          |          |
|---|----------|----------|----------|
| H | 0.641855 | 17.34196 | 13.01518 |
| C | -1.37857 | 17.77258 | 13.52382 |
| H | -1.17998 | 18.8405  | 13.623   |
| H | -1.33635 | 17.33883 | 14.52289 |
| H | -2.39561 | 17.65643 | 13.14365 |
| C | -0.41168 | 17.80976 | 11.24288 |
| H | -1.38487 | 17.64766 | 10.77149 |
| H | -0.24233 | 18.88289 | 11.3329  |

**Table S22.** Optimized coordinates (PBE0/def2-TZVPP) for  $\mathbf{3}^+(\text{As})$ .

|    |          |          |          |
|----|----------|----------|----------|
| As | 1.542823 | 16.03719 | 10.61796 |
| O  | 0.517359 | 17.42601 | 10.33048 |
| C  | 3.304847 | 15.09004 | 8.524603 |
| C  | 3.019531 | 16.87136 | 11.57843 |
| C  | 0.330011 | 14.91123 | 11.62266 |
| C  | 0.256106 | 13.5201  | 11.47532 |
| C  | 1.471845 | 15.56977 | 6.473255 |
| H  | 0.764201 | 15.71744 | 5.667361 |
| C  | 1.985399 | 15.49949 | 8.80826  |
| C  | 3.681683 | 15.00563 | 7.189398 |
| H  | 4.692893 | 14.70496 | 6.945124 |
| C  | 1.026543 | 15.67835 | 7.787384 |
| C  | -0.79509 | 12.86543 | 12.11353 |
| H  | -0.88447 | 11.79087 | 12.01355 |
| C  | 3.528651 | 16.30983 | 12.7643  |
| C  | 2.786318 | 15.27222 | 6.172033 |
| H  | 3.105    | 15.21138 | 5.138637 |
| C  | -0.57566 | 15.62826 | 12.42933 |
| C  | 1.268103 | 12.68971 | 10.72113 |
| H  | 2.077503 | 13.35278 | 10.40535 |
| C  | -1.71121 | 13.55243 | 12.88396 |
| H  | -2.51631 | 13.01664 | 13.37169 |
| C  | 3.470358 | 18.1188  | 11.09184 |
| C  | -1.59434 | 14.92225 | 13.05288 |
| H  | -2.30517 | 15.44361 | 13.67856 |
| C  | 3.209825 | 14.91874 | 13.27115 |
| H  | 2.581879 | 14.41539 | 12.53301 |
| C  | 4.306218 | 14.61651 | 9.561315 |
| H  | 3.839466 | 14.67441 | 10.54913 |
| C  | 2.436748 | 14.94904 | 14.5874  |
| H  | 3.023626 | 15.42901 | 15.3728  |
| H  | 2.210033 | 13.93375 | 14.91822 |
| H  | 1.494672 | 15.4909  | 14.49591 |
| C  | 4.429053 | 17.06756 | 13.50593 |

|   |          |          |          |
|---|----------|----------|----------|
| H | 4.821888 | 16.66393 | 14.43074 |
| C | 4.653054 | 13.14446 | 9.316414 |
| H | 5.244452 | 13.03092 | 8.406632 |
| H | 3.764019 | 12.52235 | 9.209021 |
| H | 5.247929 | 12.75576 | 10.14496 |
| C | 1.884975 | 11.61706 | 11.6191  |
| H | 1.147496 | 10.86129 | 11.89331 |
| H | 2.290212 | 12.03632 | 12.54078 |
| H | 2.693511 | 11.10675 | 11.09305 |
| C | 4.481438 | 14.08142 | 13.41726 |
| H | 5.059655 | 14.05229 | 12.49254 |
| H | 4.226995 | 13.05626 | 13.69208 |
| H | 5.130697 | 14.47479 | 14.20076 |
| C | -0.45476 | 15.94094 | 7.994699 |
| H | -0.68079 | 15.86533 | 9.059049 |
| C | 3.057788 | 18.77494 | 9.783762 |
| H | 2.397696 | 18.10778 | 9.23173  |
| C | -0.85154 | 17.33682 | 7.516155 |
| H | -0.6926  | 17.43536 | 6.440364 |
| H | -0.2771  | 18.115   | 8.016557 |
| H | -1.91231 | 17.51289 | 7.705758 |
| C | -1.31559 | 14.89022 | 7.290725 |
| H | -2.36699 | 15.06413 | 7.526679 |
| H | -1.06675 | 13.87507 | 7.59967  |
| H | -1.21413 | 14.94352 | 6.205819 |
| C | 0.672386 | 12.05665 | 9.467535 |
| H | 1.421529 | 11.45032 | 8.954707 |
| H | 0.314729 | 12.81212 | 8.769328 |
| H | -0.1648  | 11.40284 | 9.719417 |
| C | 5.584935 | 15.44646 | 9.609046 |
| H | 6.287763 | 15.00978 | 10.32107 |
| H | 5.39551  | 16.47398 | 9.914723 |
| H | 6.076924 | 15.46415 | 8.634769 |
| C | 4.844531 | 18.31271 | 13.07835 |
| H | 5.544914 | 18.88577 | 13.67348 |
| C | 4.384892 | 18.81452 | 11.87688 |
| H | 4.743704 | 19.77613 | 11.53224 |
| C | 4.257687 | 19.04788 | 8.876233 |
| H | 4.975666 | 19.72494 | 9.341609 |
| H | 3.915388 | 19.51938 | 7.953292 |
| H | 4.782456 | 18.13146 | 8.607405 |
| C | 2.289747 | 20.07056 | 10.04079 |
| H | 1.425855 | 19.90741 | 10.68409 |
| H | 1.938522 | 20.49353 | 9.097971 |
| H | 2.926458 | 20.81701 | 10.51999 |

|   |          |          |          |
|---|----------|----------|----------|
| C | -0.45037 | 17.12601 | 12.57941 |
| H | 0.553027 | 17.35043 | 12.96522 |
| C | -1.45861 | 17.76513 | 13.51965 |
| H | -1.25644 | 18.83286 | 13.61    |
| H | -1.40279 | 17.33419 | 14.51935 |
| H | -2.48188 | 17.65056 | 13.15573 |
| C | -0.54678 | 17.77553 | 11.20822 |
| H | -1.49526 | 17.50634 | 10.73098 |
| H | -0.51049 | 18.8624  | 11.30775 |

**Table S23.** Optimized coordinates (PBE0/def2-TZVPP) for  $\mathbf{3}^+(\text{Sb})$ .

|    |          |          |          |
|----|----------|----------|----------|
| Sb | 1.575269 | 16.04027 | 10.62815 |
| O  | 0.430463 | 17.58398 | 10.4121  |
| C  | 3.331053 | 15.00889 | 8.354546 |
| C  | 3.19324  | 16.95923 | 11.66451 |
| C  | 0.203432 | 14.84589 | 11.707   |
| C  | 0.172197 | 13.45399 | 11.58581 |
| C  | 1.480991 | 15.47654 | 6.311214 |
| H  | 0.767636 | 15.62795 | 5.510558 |
| C  | 2.027835 | 15.45452 | 8.635452 |
| C  | 3.68412  | 14.85699 | 7.017788 |
| H  | 4.682763 | 14.51905 | 6.768847 |
| C  | 1.064856 | 15.64494 | 7.6292   |
| C  | -0.87874 | 12.78139 | 12.20635 |
| H  | -0.93552 | 11.70212 | 12.13441 |
| C  | 3.735203 | 16.35133 | 12.80649 |
| C  | 2.778167 | 15.11178 | 6.005234 |
| H  | 3.077409 | 14.99711 | 4.970567 |
| C  | -0.7542  | 15.56925 | 12.44213 |
| C  | 1.215745 | 12.65247 | 10.84279 |
| H  | 2.0167   | 13.33827 | 10.5374  |
| C  | -1.84229 | 13.46742 | 12.91833 |
| H  | -2.65012 | 12.92412 | 13.39322 |
| C  | 3.627631 | 18.21098 | 11.19534 |
| C  | -1.77783 | 14.84631 | 13.042   |
| H  | -2.53546 | 15.36056 | 13.61652 |
| C  | 3.340962 | 14.97765 | 13.30297 |
| H  | 2.699539 | 14.50867 | 12.54679 |
| C  | 4.337621 | 14.59302 | 9.407796 |
| H  | 3.883642 | 14.72828 | 10.39833 |
| C  | 2.529098 | 15.05959 | 14.59341 |
| H  | 3.124617 | 15.49686 | 15.3972  |
| H  | 2.213957 | 14.06449 | 14.91272 |
| H  | 1.635707 | 15.67335 | 14.46876 |

|   |          |          |          |
|---|----------|----------|----------|
| C | 4.698452 | 17.06091 | 13.51659 |
| H | 5.128134 | 16.62628 | 14.41073 |
| C | 4.665633 | 13.10457 | 9.275061 |
| H | 5.203778 | 12.90644 | 8.346809 |
| H | 3.766635 | 12.48654 | 9.273135 |
| H | 5.303732 | 12.78274 | 10.10011 |
| C | 1.852727 | 11.589   | 11.73524 |
| H | 1.127966 | 10.81912 | 12.00457 |
| H | 2.244675 | 12.01392 | 12.66026 |
| H | 2.672604 | 11.09481 | 11.21121 |
| C | 4.552822 | 14.06444 | 13.47453 |
| H | 5.143731 | 13.99952 | 12.55934 |
| H | 4.232771 | 13.05703 | 13.74601 |
| H | 5.210523 | 14.41847 | 14.26978 |
| C | -0.39042 | 15.98426 | 7.878504 |
| H | -0.5753  | 15.9508  | 8.955973 |
| C | 3.112857 | 18.90124 | 9.947393 |
| H | 2.425257 | 18.2326  | 9.42118  |
| C | -0.73553 | 17.38839 | 7.388013 |
| H | -0.59297 | 17.46709 | 6.308199 |
| H | -0.1177  | 18.14457 | 7.871389 |
| H | -1.78255 | 17.61622 | 7.597601 |
| C | -1.32271 | 14.95158 | 7.244133 |
| H | -2.35737 | 15.1747  | 7.510244 |
| H | -1.09925 | 13.93792 | 7.578158 |
| H | -1.25577 | 14.96614 | 6.155131 |
| C | 0.646079 | 12.02317 | 9.574603 |
| H | 1.419082 | 11.46605 | 9.041897 |
| H | 0.244597 | 12.77763 | 8.898163 |
| H | -0.1575  | 11.32529 | 9.817444 |
| C | 5.614641 | 15.42595 | 9.382602 |
| H | 6.313125 | 15.07142 | 10.14282 |
| H | 5.415546 | 16.4792  | 9.575836 |
| H | 6.113112 | 15.34597 | 8.414767 |
| C | 5.123488 | 18.30686 | 13.09526 |
| H | 5.874647 | 18.84199 | 13.6632  |
| C | 4.602608 | 18.86525 | 11.94385 |
| H | 4.958729 | 19.83323 | 11.6137  |
| C | 4.234447 | 19.23124 | 8.963561 |
| H | 4.960863 | 19.92044 | 9.396867 |
| H | 3.817407 | 19.7118  | 8.076899 |
| H | 4.769834 | 18.33846 | 8.639421 |
| C | 2.326063 | 20.16036 | 10.30554 |
| H | 1.501953 | 19.93606 | 10.98198 |
| H | 1.914027 | 20.61638 | 9.403621 |

|   |          |          |          |
|---|----------|----------|----------|
| H | 2.969719 | 20.8995  | 10.787   |
| C | -0.68415 | 17.07838 | 12.56178 |
| H | 0.296137 | 17.34275 | 12.98422 |
| C | -1.74465 | 17.68806 | 13.46556 |
| H | -1.57626 | 18.76108 | 13.56055 |
| H | -1.71665 | 17.25927 | 14.46733 |
| H | -2.74955 | 17.54525 | 13.06211 |
| C | -0.74666 | 17.73827 | 11.18521 |
| H | -1.6119  | 17.35593 | 10.62959 |
| H | -0.88026 | 18.81592 | 11.31016 |

**Table S24.** Optimized coordinates (PBE0/def2-TZVPP) for H<sub>2</sub>.

|   |          |          |          |
|---|----------|----------|----------|
| H | 1.213722 | 16.39218 | 10.49317 |
| H | 0.776893 | 16.97779 | 10.34751 |
